# Supplementary material
Source: Research Square preprint supplement (doi:10.21203/rs.3.rs-9417145/v1)
Supplement: Supplementary file 2 [file 7b366249acfebcab0772eb2a.xlsx]

## Sheet: Dataset S1
Dataset S1. List of OTS-1000ex
Gene	CDS_Change	AA_Change	Chromosome_Position	Mutation_Type	Legacy_Mutation_ID	Count_in _COSMIC	Frequency_in _COSMIC(%)	ClinVar	InterVar	ToMMo_ 54KJPN	ToMMo_ 38KJPN	ToMMo_ 14KJPN	gnomAD_v3 _Genome	Highest_SNP _Frequency	SNP (Y:1, N:0)	AssayNo_Validated_ HumanDNA	AssayNo_ Validated_ SynthesizedDNA	Validation_ by_HumanDNA (Y:1, N:0)	Designed (Y:1, N:0)	Validation (Y:1, N:0)
AKT1	c.49G>A	p.E17K	104780214	Substitution - Missense	COSM33765	767	49.9024	Pathogenic	Likely pathogenic​	NA	NA	NA	NA	NA	0	16	9	1	1	1
AKT1	c.726G>A	p.E242=	104773557	Substitution - coding silent	COSM3765730	65	4.22902	Benign​	Benign​	0.474623	0.475156	0.477493	0.233525	0.477493	1	0	0	0	0	0
AKT1	c.155T>G	p.L52R	104780108	Substitution - Missense	COSM93893	17	1.10605	NA	Uncertain significance	NA	NA	NA	NA	NA	0	0	0	0	1	0
AKT1	c.235C>A	p.Q79K	104776711	Substitution - Missense	COSM159008	16	1.04099	Likely pathogenic​	Likely pathogenic​	NA	NA	NA	NA	NA	0	0	0	0	1	0
ALK	c.3522C>A	p.F1174L	29220829	Substitution - Missense	COSM28055	111	4.41703	Pathogenic/Likely pathogenic​	Uncertain significance	NA	NA	NA	NA	NA	0	0	0	0	1	0
ALK	c.3824G>A	p.R1275Q	29209798	Substitution - Missense	COSM28056	105	4.17827	Pathogenic​	Likely pathogenic​	NA	NA	NA	NA	NA	0	0	1	0	1	1
ALK	c.4338C>T	p.T1446=	29193749	Substitution - coding silent	COSM5019786	97	2.06867	Benign	Benign	9e-06	NA	NA	0.104095	0.104095	1	0	0	0	0	0
ALK	c.2535T>C	p.G845=	29232401	Substitution - coding silent	COSM148825	40	1.59172	Benign​	Benign​	0.161661	0.161743	0.162467	0.624808	0.624808	1	0	0	0	0	0
ARID1A	c.5965C>T	p.R1989X	26779863	Substitution - Nonsense	COSM51425	78	2.47934	Pathogenic​	Uncertain significance	NA	NA	NA	NA	NA	0	0	1	0	1	1
ARID1A	c.5548dupG	p.D1850GfsX4	26779446..26779447	Insertion - Frameshift	COSM133004	75	2.08528	NA	NA	NA	NA	NA	NA	NA	0	0	1	0	1	1
ARID1A	c.3826C>T	p.R1276X	26773456	Substitution - Nonsense	COSM83884	36	1.14431	Pathogenic​	Pathogenic​	NA	NA	NA	NA	NA	0	24	2	1	1	1
ARID1A	c.5161C>T	p.R1721X	26779059	Substitution - Nonsense	COSM51441	36	1.14431	NA	Uncertain significance	NA	NA	NA	NA	NA	0	1	0	1	1	1
ARID1A	c.2077C>T	p.R693X	26761012	Substitution - Nonsense	COSM184236	35	1.11252	NA	Pathogenic​	NA	NA	NA	NA	NA	0	0	1	0	1	1
ARID1A	c.4003C>T	p.R1335X	26773716	Substitution - Nonsense	COSM907723	24	0.762873	Pathogenic​	Pathogenic​	NA	NA	NA	NA	NA	0	30	0	1	1	1
ARID1A	c.2830C>T	p.Q944X	26766318	Substitution - Nonsense	COSM130413	22	0.699301	NA	Pathogenic​	NA	NA	NA	NA	NA	0	0	1	0	1	1
ARID1A	c.5164C>T	p.R1722X	26779062	Substitution - Nonsense	COSM51418	22	0.699301	Pathogenic​	Uncertain significance	NA	NA	NA	NA	NA	0	0	1	0	1	1
ARID1A	c.4336C>T	p.R1446X	26774563	Substitution - Nonsense	COSM907726	21	0.667514	NA	Pathogenic​	NA	NA	NA	NA	NA	0	0	1	0	1	1
ARID1A	c.6259G>A	p.G2087R	26780157	Substitution - Missense	COSM132992	21	0.667514	other​	Uncertain significance	NA	NA	NA	NA	NA	0	0	1	0	1	1
ARID1A	c.6472C>T	p.R2158X	26780370	Substitution - Nonsense	COSM51432	18	0.572155	NA	Uncertain significance	NA	NA	NA	NA	NA	0	0	1	0	1	1
ARID1A	c.4381C>T	p.R1461X	26774608	Substitution - Nonsense	COSM4031017	16	0.508582	NA	Pathogenic​	NA	NA	NA	NA	NA	0	5	1	1	1	1
ARID1A	c.4582C>T	p.R1528X	26774809	Substitution - Nonsense	COSM51475	16	0.508582	NA	Pathogenic​	NA	NA	NA	NA	NA	0	0	0	0	0	0
ARID1A	c.3634C>T	p.Q1212X	26772906	Substitution - Nonsense	COSM254541	14	0.44501	NA	Pathogenic​	NA	NA	NA	NA	NA	0	0	0	0	0	0
ARID1A	c.1897C>T	p.Q633X	26732769	Substitution - Nonsense	COSM254551	12	0.381437	NA	Pathogenic​	NA	NA	NA	NA	NA	0	0	2	0	1	1
ARID1A	c.2248C>T	p.R750X	26761470	Substitution - Nonsense	COSM907698	12	0.381437	NA	Pathogenic​	NA	NA	NA	NA	NA	0	0	0	0	0	0
ARID1A	c.3598C>T	p.Q1200X	26772870	Substitution - Nonsense	COSM1296224	12	0.381437	NA	Pathogenic​	NA	NA	NA	NA	NA	0	0	0	0	0	0
ARID1A	c.1435C>T	p.Q479X	26731236	Substitution - Nonsense	COSM332817	11	0.34965	NA	Pathogenic​	NA	NA	NA	NA	NA	0	0	0	0	0	0
ARID1A	c.3424C>T	p.Q1142X	26772517	Substitution - Nonsense	COSM251400	10	0.317864	NA	Pathogenic​	NA	NA	NA	NA	NA	0	0	0	0	0	0
ARID1A	c.4750C>T	p.Q1584X	26774977	Substitution - Nonsense	COSM254547	10	0.317864	NA	Pathogenic​	NA	NA	NA	NA	NA	0	0	0	0	0	0
ARID1A	c.1210C>T	p.Q404X	26729723	Substitution - Nonsense	COSM251401	9	0.286078	Pathogenic​	Pathogenic​	NA	NA	NA	NA	NA	0	0	0	0	0	0
ARID1A	c.1901C>G	p.S634X	26732773	Substitution - Nonsense	COSM1296222	9	0.286078	NA	Pathogenic​	NA	NA	NA	NA	NA	0	0	0	0	0	0
ARID1A	c.1177C>T	p.Q393X	26729690	Substitution - Nonsense	COSM51446	8	0.254291	NA	Pathogenic​	NA	NA	NA	NA	NA	0	0	0	0	0	0
ARID1A	c.1696C>T	p.Q566X	26731497	Substitution - Nonsense	COSM1296220	8	0.254291	NA	Pathogenic​	NA	NA	NA	NA	NA	0	0	0	0	0	0
ARID1A	c.2032C>T	p.Q678X	26760967	Substitution - Nonsense	COSM5607834	8	0.254291	NA	Pathogenic​	NA	NA	NA	NA	NA	0	0	0	0	0	0
ARID1A	c.4477C>T	p.Q1493X	26774704	Substitution - Nonsense	COSM254550	8	0.254291	NA	Pathogenic​	NA	NA	NA	NA	NA	0	0	0	0	0	0
ARID1A	c.4624G>T	p.E1542X	26774851	Substitution - Nonsense	COSM51483	8	0.254291	NA	Pathogenic​	NA	NA	NA	NA	NA	0	0	0	0	0	0
ARID1A	c.1543C>T	p.Q515X	26731344	Substitution - Nonsense	COSM5752706	7	0.222505	NA	Pathogenic​	NA	NA	NA	NA	NA	0	0	0	0	0	0
ARID1A	c.2518C>T	p.Q840X	26763071	Substitution - Nonsense	COSM1341405	7	0.222505	NA	Pathogenic​	NA	NA	NA	NA	NA	0	0	0	0	0	0
ARID1A	c.2632C>T	p.Q878X	26763185	Substitution - Nonsense	COSM251399	7	0.222505	Pathogenic​	Pathogenic​	NA	NA	NA	NA	NA	0	0	0	0	0	0
ARID1A	c.4087C>T	p.Q1363X	26773884	Substitution - Nonsense	COSM1296226	7	0.222505	Pathogenic​	Pathogenic​	NA	NA	NA	NA	NA	0	0	0	0	0	0
ARID1A	c.6260G>A	p.G2087E	26780158	Substitution - Missense	COSM251421	7	0.222505	NA	Uncertain significance	NA	NA	NA	NA	NA	0	0	0	0	0	0
ARID2	c.890C>T	p.S297F	45836858	Substitution - Missense	COSM1167991	28	1.5855	NA	Uncertain significance	NA	NA	NA	NA	NA	0	0	0	0	1	0
ARID2	c.940C>T	p.R314C	45836908	Substitution - Missense	COSM278971	23	1.30238	NA	Uncertain significance	NA	NA	NA	NA	NA	0	0	0	0	0	0
ARID2	c.1624C>T	p.R542X	45848879	Substitution - Nonsense	COSM1245454	16	0.906002	NA	Pathogenic​	NA	NA	NA	NA	NA	0	0	0	0	0	0
ARID2	c.820C>T	p.R274X	45836788	Substitution - Nonsense	COSM1512174	14	0.792752	Likely pathogenic​	Pathogenic​	NA	NA	NA	NA	NA	0	0	0	0	0	0
ASXL1	c.1934dup	p.G646WfsX12	32434646..32434647	Insertion - Frameshift	COSM34210	566	35.375	Pathogenic/Likely pathogenic​	NA	NA	NA	NA	NA	NA	0	0	6	0	1	1
ASXL1	c.2077C>T	p.R693X	32434789	Substitution - Nonsense	COSM51388	118	7.375	Pathogenic/Likely pathogenic​	Uncertain significance	9e-06	1.3e-05	NA	2e-05	2e-05	0	0	0	0	1	0
ATM	c.5557G>A	p.D1853N	108304735	Substitution - Missense	COSM41596	65	1.84293	NA	Benign	0.000285	0.00031	0.000248	0.106394	0.106394	1	0	0	0	0	0
ATM	c.1009C>T	p.R337C	108247071	Substitution - Missense	COSM21323	60	1.70116	Conflicting interpretations of pathogenicity​ Uncertain significance(13); Likely benign(1)	Uncertain significance	NA	NA	NA	0.000171	0.000171	0	1	0	1	1	1
ATM	c.9023G>A	p.R3008H	108365360	Substitution - Missense	COSM21626	34	0.963992	Pathogenic/Likely pathogenic​	Uncertain significance	9e-06	NA	NA	1.3e-05	1.3e-05	0	0	0	0	0	0
ATM	c.1010G>A	p.R337H	108247072	Substitution - Missense	COSM21301	33	0.935639	Conflicting interpretations of pathogenicity​ Uncertain significance(9); Benign(1); Likely benign(2)	Uncertain significance	NA	NA	NA	7.2e-05	7.2e-05	0	0	0	0	0	0
ATR	c.7875G>A	p.Q2625=	142449489	Substitution - coding silent	COSM9213154	418	16.2204	Benign/Likely benign	Benign	0.879225	0.879436	0.880282	0.886622	0.886622	1	0	0	0	0	0
ATR	c.5460T>C	p.Y1820=	142498695	Substitution - coding silent	COSM9213216	100	3.88048	Benign/Likely benign​	Benign	0.000193	0.000194	0.000212	0.078655	0.078655	1	0	0	0	0	0
ATRX	c.4276C>T	p.R1426X	77654139	Substitution - Nonsense	COSM144223	19	0.892019	NA	Pathogenic​	NA	NA	NA	NA	NA	0	0	0	0	0	0
ATRX	c.5579A>G	p.N1860S	77600552	Substitution - Missense	COSM5001990	12	0.56338	Uncertain significance​	Benign	NA	NA	NA	0.006482	0.006482	0	0	0	0	0	0
ATRX	c.2719C>T	p.R907X	77682537	Substitution - Nonsense	COSM13837	10	0.469484	NA	Likely pathogenic​	NA	NA	NA	NA	NA	0	1	0	1	1	1
ATRX	c.2341C>T	p.R781X	77682915	Substitution - Nonsense	COSM1716656	8	0.375587	Pathogenic​	Pathogenic​	NA	NA	NA	NA	NA	0	0	0	0	0	0
ATRX	c.5408G>A	p.R1803H	77618846	Substitution - Missense	COSM96934	8	0.375587	NA	Uncertain significance	NA	NA	NA	NA	NA	0	0	0	0	0	0
ATRX	c.748C>T	p.R250X	77684508	Substitution - Nonsense	COSM4993587	7	0.328638	Pathogenic​	Pathogenic​	NA	NA	NA	9e-06	9e-06	0	0	0	0	0	0
BCL6	c.1781G>A	p.R594Q	187725557	Substitution - Missense	COSM209193	11	1.86441	NA	Uncertain significance	NA	NA	NA	NA	NA	0	0	0	0	1	0
BCOR	c.4376A>G	p.N1459S	40062191	Substitution - Missense	COSM403987	73	5.15173	Uncertain significance​	Likely benign	NA	NA	NA	9e-06	9e-06	0	0	0	0	1	0
BRAF	c.1799T>A	p.V600E	140753336	Substitution - Missense	COSM476	28368	94.2928	NA	Likely pathogenic​	NA	NA	NA	NA	NA	0	24	5	1	1	1
BRAF	c.1798_1799delinsAA	p.V600K	140753336..140753337	Substitution - Missense	COSM473	748	2.08853	drug response​	NA	NA	NA	NA	NA	NA	0	0	1	0	1	1
BRAF	c.1801A>G	p.K601E	140753334	Substitution - Missense	COSM478	146	0.485292	NA	Uncertain significance	NA	NA	NA	NA	NA	0	3	2	1	1	1
BRAF	c.1781A>G	p.D594G	140753354	Substitution - Missense	COSM467	108	0.358983	Conflicting interpretations of pathogenicity Pathogenic(1); Uncertain significance(1)	Likely pathogenic​	NA	NA	NA	NA	NA	0	1	0	1	1	1
BRAF	c.1406G>C	p.G469A	140781602	Substitution - Missense	COSM460	88	0.292505	NA	Likely pathogenic​	NA	NA	NA	NA	NA	0	2	0	1	1	1
BRAF	c.1780G>A	p.D594N	140753355	Substitution - Missense	COSM27639	54	0.179491	Likely pathogenic​	Likely pathogenic​	NA	NA	NA	NA	NA	0	11	0	1	1	1
BRAF	c.1397G>T	p.G466V	140781611	Substitution - Missense	COSM451	37	0.122985	Pathogenic/Likely pathogenic​	Likely pathogenic​	NA	NA	NA	NA	NA	0	0	0	0	0	0
BRAF	c.1798G>A	p.V600M	140753337	Substitution - Missense	COSM1130	32	0.106365	Likely pathogenic​	Likely pathogenic​	NA	NA	NA	NA	NA	0	0	2	0	1	1
BRAF	c.1742A>G	p.N581S	140753393	Substitution - Missense	COSM462	32	0.106365	NA	Likely pathogenic​	9e-06	1.3e-05	NA	NA	1.3e-05	0	0	0	0	0	0
BRAF	c.1397G>A	p.G466E	140781611	Substitution - Missense	COSM453	28	0.0930696	Conflicting interpretations of pathogenicity​ Likely pathogenic(1); Uncertain significance(1)	Likely pathogenic​	NA	NA	NA	NA	NA	0	0	0	0	0	0
BRAF	c.1405G>A	p.G469R	140781603	Substitution - Missense	COSM457	28	0.0930696	NA	Likely pathogenic​	NA	NA	NA	NA	NA	0	0	0	0	0	0
BRAF	c.1406G>T	p.G469V	140781602	Substitution - Missense	COSM459	28	0.0930696	NA	Likely pathogenic​	NA	NA	NA	NA	NA	0	0	0	0	0	0
BRCA1	c.2612C>T	p.P871L	43092919	Substitution - Missense	COSM148278	79	4.69121	Benign​	Benign​	0.328047	0.326994	0.324262	0.487082	0.487082	1	0	0	0	0	0
BRCA1	c.3548A>G	p.K1183R	43091983	Substitution - Missense	COSM148277	76	4.51306	Benign​	Benign​	0.328227	0.327115	0.324368	0.31546	0.328227	1	0	0	0	0	0
BRCA1	c.2077G>A	p.D693N	43093454	Substitution - Missense	COSM4989394	72	4.27553	Benign​	Benign​	9e-06	1.3e-05	NA	0.056913	0.056913	1	0	0	0	0	0
BRCA1	c.4900A>G	p.S1634G	43071077	Substitution - Missense	COSM3755559	62	3.68171	Uncertain significance​	Benign​	0.328757	0.327725	0.324616	0.317852	0.328757	1	0	0	0	0	0
BRCA1	c.3113A>G	p.E1038G	43092418	Substitution - Missense	COSM3755562	52	3.08789	Benign​	Benign​	0.328025	0.327022	0.324227	0.300299	0.328025	1	0	0	0	0	0
BRCA1	c.3119G>A	p.S1040N	43092412	Substitution - Missense	COSM1166811	33	1.95962	Benign​	Benign​	NA	NA	NA	0.014323	0.014323	1	0	0	0	0	0
BRCA2	c.7397T>C	p.V2466A	32355250	Substitution - Missense	COSM7335572	78	2.76008	Benign​	Benign​	1	1	1	0.98061	1	1	0	0	0	0	0
BRCA2	c.865A>C	p.N289H	32332343	Substitution - Missense	COSM3999066	64	2.26469	Benign	Benign​	0.131483	0.13119	0.128105	0.040874	0.131483	1	0	0	0	0	0
BRCA2	c.2971A>G	p.N991D	32337326	Substitution - Missense	COSM4986759	61	2.15853	Benign	Benign​	0.131262	0.13098	0.128176	0.046832	0.131262	1	0	0	0	0	0
BRCA2	c.1365A>G	p.S455=	32332843	Substitution - coding silent	COSM3999068	58	2.05237	Benign	Benign​	0.131449	0.131197	0.128141	0.040827	0.131449	1	0	0	0	0	0
BRCA2	c.1114A>C	p.N372H	32332592	Substitution - Missense	COSM147663	57	2.01699	Benign	Benign​	0.2135	0.213579	0.213532	0.237922	0.237922	1	0	0	0	0	0
BRCA2	c.2229T>C	p.H743=	32336584	Substitution - coding silent	COSM5019762	57	2.01699	Benign	Benign​	0.131498	0.131234	0.128105	0.040873	0.131498	1	0	0	0	0	0
BRCA2	c.3807T>C	p.V1269=	32338162	Substitution - coding silent	COSM6849605	56	1.9816	Benign​	Benign​	0.135922	0.136126	0.140704	0.181136	0.181136	1	0	0	0	0	0
CALR	c.1099_1150del	p.L367Tfs*46	12943758..12943809	Deletion - Frameshift	COSM1738055	1884	47.648	Pathogenic​	NA	NA	NA	NA	NA	NA	0	0	0	0	0	0
CARD11	c.1876G>A	p.E626K	2924297	Substitution - Missense	COSM461608	24	1.26917	Uncertain significance​	Uncertain significance​	NA	NA	NA	NA	NA	0	0	0	0	1	0
CARD11	c.688G>A	p.D230N	2939925	Substitution - Missense	COSM41657	21	1.11052	NA	Uncertain significance​	NA	NA	NA	NA	NA	0	0	0	0	0	0
CD79B	c.589T>C	p.Y197H	63929439	Substitution - Missense	COSM220734	52	13.4715	Likely pathogenic​	Uncertain significance​	NA	NA	NA	NA	NA	0	0	1	0	1	1
CD79B	c.589T>A	p.Y197N	63929439	Substitution - Missense	COSM144393	23	9.09091	NA	Uncertain significance​	NA	NA	NA	NA	NA	0	0	1	0	1	1
CD79B	c.590A>G	p.Y197C	63929438	Substitution - Missense	COSM220736	25	8.99281	NA	Uncertain significance​	NA	NA	NA	NA	NA	0	0	1	0	1	1
CD79B	c.590A>C	p.Y197S	63929438	Substitution - Missense	COSM220733	29	8.68263	NA	Uncertain significance​	NA	NA	NA	NA	NA	0	0	1	0	1	1
CD79B	c.589T>G	p.Y197D	63929439	Substitution - Missense	COSM1737939	14	6.08696	NA	Uncertain significance​	NA	NA	NA	NA	NA	0	0	1	0	1	1
CD79B	c.590A>T	p.Y197F	63929438	Substitution - Missense	COSM220735	13	6.01852	NA	Uncertain significance​	NA	NA	NA	NA	NA	0	0	1	0	1	1
CDH1	c.67C>T	p.Q23X	68738315	Substitution - Nonsense	COSM19503	70	5.42636	Pathogenic​	Pathogenic​	NA	NA	NA	NA	NA	0	0	0	0	1	0
CDH1	c.1774G>A	p.A592T	68822063	Substitution - Missense	COSM19758	18	1.39535	Benign​	Likely pathogenic​	3.7e-05	5.2e-05	3.5e-05	0.003117	0.003117	0	0	0	0	0	0
CDH1	c.1901C>T	p.A634V	68822190	Substitution - Missense	COSM19822	14	1.08527	Pathogenic/Likely pathogenic​	Uncertain significance​	NA	NA	NA	NA	NA	0	0	0	0	0	0
CDH1	c.187C>T	p.R63X	68801693	Substitution - Nonsense	COSM435585	12	0.930233	Pathogenic​	Pathogenic​	9e-06	1.3e-05	3.5e-05	NA	3.5e-05	0	0	0	0	0	0
CDKN2A	c.238C>T	p.R80X	21971121	Substitution - Nonsense	COSM12475	307	12.7439	Pathogenic/Likely pathogenic	Pathogenic​	NA	NA	NA	NA	NA	0	3	1	1	1	1
CDKN2A	c.172C>T	p.R58X	21971187	Substitution - Nonsense	COSM12473	207	9.84776	Pathogenic​	Pathogenic​	NA	NA	NA	NA	NA	0	0	0	0	1	0
CDKN2A	c.247C>T	p.H83Y	21971112	Substitution - Missense	COSM12504	127	6.70185	Conflicting interpretations of pathogenicity​ Likely pathogenic(1); Uncertain significance(2)	Likely pathogenic​	NA	NA	NA	NA	NA	0	0	0	0	0	0
CDKN2A	c.330G>A	p.W110X	21971029	Substitution - Nonsense	COSM12547	75	4.24208	Pathogenic​	Pathogenic​	NA	NA	NA	NA	NA	0	0	0	0	1	0
CDKN2A	c.341C>T	p.P114L	21971018	Substitution - Missense	COSM12476	70	4.13467	Conflicting interpretations of pathogenicity​ Pathogenic(1); Likely pathogenic(1); Uncertain significance(1)	Likely pathogenic​	NA	NA	NA	NA	NA	0	0	0	0	0	0
CDKN2A	c.329G>A	p.W110X	21971030	Substitution - Nonsense	COSM12481	49	3.11309	Pathogenic​	Pathogenic​	NA	NA	NA	NA	NA	0	0	0	0	1	0
CDKN2A	c.262G>T	p.E88X	21971097	Substitution - Nonsense	COSM12512	49	3.0191	Pathogenic​	Pathogenic​	NA	NA	NA	NA	NA	0	0	0	0	1	0
CDKN2A	c.358G>T	p.E120X	21971001	Substitution - Nonsense	COSM12479	37	2.42623	NA	Pathogenic​	NA	NA	NA	NA	NA	0	8	0	1	1	1
CDKN2A	c.322G>T	p.D108Y	21971037	Substitution - Missense	COSM13489	35	2.35215	Conflicting interpretations of pathogenicity​ Likely pathogenic(1); Uncertain significance(1)	Uncertain significance​	NA	NA	NA	NA	NA	0	0	0	0	1	0
CDKN2A	c.250G>T	p.D84Y	21971109	Substitution - Missense	COSM13299	32	2.20234	Conflicting interpretations of pathogenicity​ Pathogenic(1); Uncertain significance(2)	Uncertain significance​	NA	NA	NA	NA	NA	0	0	0	0	1	0
CDKN2A	c.205G>T	p.E69X	21971154	Substitution - Nonsense	COSM13281	30	2.15672	Likely pathogenic​	Pathogenic​	NA	NA	NA	NA	NA	0	0	0	0	1	0
CDKN2A	c.250G>A	p.D84N	21971109	Substitution - Missense	COSM13488	30	2.11119	Conflicting interpretations of pathogenicity​ Likely pathogenic(2); Uncertain significance(2)	Uncertain significance​	NA	NA	NA	NA	NA	0	0	0	0	0	0
CDKN2A	c.242C>T	p.P81L	21971117	Substitution - Missense	COSM13224	26	1.91036	Likely pathogenic	Uncertain significance​	NA	NA	NA	NA	NA	0	0	0	0	0	0
CDKN2A	c.148C>T	p.Q50X	21974680	Substitution - Nonsense	COSM12506	25	1.87266	Pathogenic​	Pathogenic​	NA	NA	NA	NA	NA	0	0	0	0	0	0
CDKN2A	c.35C>A	p.S12X	21974793	Substitution - Nonsense	COSM13522	23	1.7871	Pathogenic​	Pathogenic​	NA	NA	NA	NA	NA	0	7	0	1	1	1
CDKN2A	c.322G>A	p.D108N	21971037	Substitution - Missense	COSM12484	23	1.75573	Conflicting interpretations of pathogenicity​ Likely pathogenic(1); Uncertain significance(3)	Uncertain significance​	NA	NA	NA	NA	NA	0	0	0	0	1	0
CDKN2A	c.143C>T	p.P48L	21974685	Substitution - Missense	COSM12743	21	1.66139	NA	Uncertain significance​	NA	NA	NA	NA	NA	0	0	0	0	0	0
CDKN2A	c.181G>T	p.E61X	21971178	Substitution - Nonsense	COSM13486	20	1.60901	Likely pathogenic​	Pathogenic​	NA	NA	NA	NA	NA	0	0	0	0	0	0
CDKN2A	c.251A>G	p.D84G	21971108	Substitution - Missense	COSM13274	15	0.622665	NA	Uncertain significance​	NA	NA	NA	NA	NA	0	0	0	0	0	0
CDKN2A	c.262G>A	p.E88K	21971097	Substitution - Missense	COSM12550	15	0.622665	Uncertain significance​	Uncertain significance​	NA	NA	NA	NA	NA	0	0	0	0	0	0
CDKN2A	c.322G>C	p.D108H	21971037	Substitution - Missense	COSM13520	12	0.498132	NA	Uncertain significance​	NA	NA	NA	NA	NA	0	1	0	1	1	1
CDKN2A	c.387C>A	p.Y129X	21970972	Substitution - Nonsense	COSM28562	12	0.498132	Pathogenic​	Likely pathogenic​	NA	NA	NA	NA	NA	0	0	0	0	1	0
CDKN2A	c.442G>A	p.A148T	21970917	Substitution - Missense	COSM3736958	12	0.498132	Benign​	Benign​	NA	NA	NA	0.019701	0.019701	1	0	0	0	0	0
CDKN2A	c.107C>G	p.A36G	21974721	Substitution - Missense	COSM3926636	11	0.456621	NA	Uncertain significance​	NA	NA	NA	NA	NA	0	0	0	0	0	0
CDKN2A	c.170C>T	p.A57V	21971189	Substitution - Missense	COSM13252	10	0.41511	Conflicting interpretations of pathogenicity​ Uncertain significance(6); Benign(2); Likely benign(2)	Uncertain significance​	NA	NA	NA	5.9e-05	5.9e-05	0	0	0	0	0	0
CDKN2A	c.248A>G	p.H83R	21971111	Substitution - Missense	COSM13253	10	0.41511	Conflicting interpretations of pathogenicity​ Pathogenic(1); Uncertain significance(1)	Likely pathogenic​	NA	NA	NA	7e-06	7e-06	0	0	0	0	0	0
CDKN2A	c.305C>T	p.A102V	21971054	Substitution - Missense	COSM13675	10	0.41511	Uncertain significance​	Uncertain significance​	NA	NA	NA	NA	NA	0	0	0	0	0	0
CDKN2A	c.45G>A	p.W15X	21974783	Substitution - Nonsense	COSM13625	10	0.41511	Pathogenic​	Pathogenic​	NA	NA	NA	NA	NA	0	0	0	0	0	0
CDKN2A	c.220G>T	p.D74Y	21971139	Substitution - Missense	COSM12509	9	0.373599	NA	Uncertain significance​	NA	NA	NA	NA	NA	0	0	0	0	1	0
CDKN2A	c.97G>T	p.E33X	21974731	Substitution - Nonsense	COSM13806	9	0.373599	Pathogenic​	Likely pathogenic​	NA	NA	NA	NA	NA	0	0	0	0	0	0
CDKN2A	c.132C>A	p.Y44X	21974696	Substitution - Nonsense	COSM13964	8	0.332088	Pathogenic​	Pathogenic​	NA	NA	NA	NA	NA	0	0	0	0	0	0
CDKN2A	c.220G>A	p.D74N	21971139	Substitution - Missense	COSM13474	8	0.332088	Uncertain significance​	Uncertain significance​	NA	NA	NA	NA	NA	0	0	0	0	0	0
CDKN2A	c.227C>T	p.A76V	21971132	Substitution - Missense	COSM13766	8	0.332088	Uncertain significance​	Uncertain significance​	NA	NA	NA	NA	NA	0	0	0	0	0	0
CDKN2A	c.244G>A	p.V82M	21971115	Substitution - Missense	COSM12469	8	0.332088	Uncertain significance​	Uncertain significance​	NA	NA	NA	NA	NA	0	0	0	0	0	0
CDKN2A	c.247C>G	p.H83D	21971112	Substitution - Missense	COSM4388670	8	0.332088	Likely pathogenic​	Uncertain significance​	NA	NA	NA	NA	NA	0	0	0	0	0	0
CDKN2A	c.355G>T	p.E119X	21971004	Substitution - Nonsense	COSM13300	8	0.332088	NA	Pathogenic​	NA	NA	NA	NA	NA	0	0	0	0	0	0
CDKN2A	c.387C>G	p.Y129X	21970972	Substitution - Nonsense	COSM13221	8	0.332088	NA	Likely pathogenic​	NA	NA	NA	NA	NA	0	0	0	0	0	0
CDKN2A	c.457G>A	p.E153K	21970902	Substitution - Missense	COSM753752	8	0.332088	Uncertain significance​	Uncertain significance​	NA	NA	NA	NA	NA	0	0	0	0	0	0
CDKN2A	c.202G>A	p.A68T	21971157	Substitution - Missense	COSM13604	7	0.290577	Uncertain significance​	Uncertain significance​	NA	NA	NA	NA	NA	0	2	0	1	1	1
CDKN2A	c.221A>C	p.D74A	21971138	Substitution - Missense	COSM4163709	7	0.290577	Uncertain significance​	Uncertain significance​	NA	NA	NA	2.7e-05	2.7e-05	0	2	1	1	1	1
CDKN2A	c.226G>A	p.A76T	21971133	Substitution - Missense	COSM13712	7	0.290577	Uncertain significance​	Uncertain significance​	NA	NA	NA	2e-05	2e-05	0	0	0	0	0	0
CDKN2A	c.290T>G	p.L97R	21971069	Substitution - Missense	COSM87425	7	0.290577	NA	Uncertain significance​	NA	NA	NA	NA	NA	0	0	0	0	0	0
CDKN2A	c.301G>T	p.G101W	21971058	Substitution - Missense	COSM48298	7	0.290577	Pathogenic​	Likely pathogenic​	NA	NA	NA	1.3e-05	1.3e-05	0	0	0	0	0	0
CDKN2A	c.305C>A	p.A102E	21971054	Substitution - Missense	COSM12502	7	0.290577	Uncertain significance​	Uncertain significance​	NA	NA	NA	NA	NA	0	0	0	0	0	0
CDKN2A	c.389T>A	p.L130Q	21970970	Substitution - Missense	COSM13670	7	0.290577	NA	Uncertain significance​	NA	NA	NA	NA	NA	0	0	0	0	0	0
CDKN2A	c.128G>T	p.S43I	21974700	Substitution - Missense	COSM13653	6	0.249066	NA	Uncertain significance​	NA	NA	NA	NA	NA	0	0	0	0	0	0
CDKN2A	c.251A>T	p.D84V	21971108	Substitution - Missense	COSM13295	6	0.249066	Likely pathogenic​	Uncertain significance​	NA	NA	NA	NA	NA	0	0	0	0	0	0
CDKN2A	c.323A>G	p.D108G	21971036	Substitution - Missense	COSM753739	6	0.249066	NA	Uncertain significance​	NA	NA	NA	NA	NA	0	0	0	0	0	0
CDKN2A	c.392G>A	p.R131H	21970967	Substitution - Missense	COSM12741	6	0.249066	Uncertain significance​	Uncertain significance​	NA	NA	NA	NA	NA	0	0	0	0	0	0
CDKN2A	c.79G>T	p.E27X	21974749	Substitution - Nonsense	COSM28676	6	0.249066	Pathogenic​	Pathogenic​	NA	NA	NA	NA	NA	0	0	0	0	0	0
CHD4	c.417G>T	p.E139D	6601981	Substitution - Missense	COSM1363775	30	2.54453	Benign	Benign	0.425471	0.426979	0.423809	0.532376	0.532376	1	0	0	0	0	0
CHD4	c.2924G>A	p.R975H	6592417	Substitution - Missense	COSM179512	18	1.52672	NA	Likely pathogenic​	NA	NA	NA	NA	NA	0	0	0	0	1	0
CHD4	c.3484C>T	p.R1162W	6587931	Substitution - Missense	COSM942712	13	1.10263	NA	Likely pathogenic​	NA	NA	NA	NA	NA	0	0	0	0	0	0
CHD4	c.3313C>T	p.R1105W	6591493	Substitution - Missense	COSM179508	11	0.932994	NA	Likely pathogenic​	NA	NA	NA	NA	NA	0	0	0	0	0	0
CHD4	c.4013G>T	p.R1338I	6583245	Substitution - Missense	COSM179505	11	0.932994	NA	Likely pathogenic​	NA	NA	NA	NA	NA	0	0	0	0	0	0
CIC	c.2816G>C	p.G939A	42291675	Substitution - Missense	COSM4283618	46	3.34302	NA	Uncertain significance​	NA	NA	NA	NA	NA	0	0	0	0	0	0
CIC	c.4533C>T	p.I1511=	42294897	Substitution - coding silent	COSM3756833	31	2.25291	NA	Benign	1.8e-05	5.2e-05	3.5e-05	0.256592	0.256592	1	0	0	0	0	0
CIC	c.643C>T	p.R215W	42287605	Substitution - Missense	COSM132818	28	2.03488	NA	Likely pathogenic​	NA	NA	NA	NA	NA	0	1	2	1	1	1
CIC	c.604C>T	p.R202W	42287566	Substitution - Missense	COSM303949	15	1.09012	NA	Uncertain significance​	NA	NA	NA	NA	NA	0	0	0	0	0	0
CIC	c.644G>A	p.R215Q	42287606	Substitution - Missense	COSM132675	14	1.01744	NA	Uncertain significance​	NA	NA	NA	NA	NA	0	1	0	1	1	1
CIC	c.601C>T	p.R201W	42287563	Substitution - Missense	COSM132673	14	1.01744	Benign	Uncertain significance​	NA	NA	NA	NA	NA	0	0	0	0	0	0
CTNNB1	c.121A>G	p.T41A	41224633	Substitution - Missense	COSM5664	1351	19.6024	Conflicting interpretations of pathogenicity; association; other​ Pathogenic(2); Likely pathogenic(9); Uncertain significance(1)	Uncertain significance​	NA	NA	NA	NA	NA	0	2	2	1	1	1
CTNNB1	c.134C>T	p.S45F	41224646	Substitution - Missense	COSM5667	838	12.159	Pathogenic/Likely pathogenic; other​	Uncertain significance​	NA	NA	NA	NA	NA	0	1	0	1	1	1
CTNNB1	c.133T>C	p.S45P	41224645	Substitution - Missense	COSM5663	473	6.86303	Pathogenic/Likely pathogenic​	Uncertain significance​	NA	NA	NA	NA	NA	0	0	2	0	1	1
CTNNB1	c.110C>T	p.S37F	41224622	Substitution - Missense	COSM5662	334	4.8462	Pathogenic/Likely pathogenic​	Uncertain significance​	NA	NA	NA	NA	NA	0	15	0	1	1	1
CTNNB1	c.98C>G	p.S33C	41224610	Substitution - Missense	COSM5677	290	4.20778	Likely pathogenic; other​	Uncertain significance​	NA	NA	NA	NA	NA	0	8	0	1	1	1
CTNNB1	c.110C>G	p.S37C	41224622	Substitution - Missense	COSM5679	222	3.22113	Pathogenic/Likely pathogenic​	Uncertain significance​	NA	NA	NA	NA	NA	0	40	0	1	1	1
CTNNB1	c.94G>T	p.D32Y	41224606	Substitution - Missense	COSM5661	202	2.93093	Pathogenic/Likely pathogenic; other​	Uncertain significance​	NA	NA	NA	NA	NA	0	0	0	0	1	0
CTNNB1	c.98C>T	p.S33F	41224610	Substitution - Missense	COSM5669	175	2.53918	Pathogenic/Likely pathogenic; other​	Uncertain significance​	NA	NA	NA	NA	NA	0	1	0	1	1	1
CTNNB1	c.122C>T	p.T41I	41224634	Substitution - Missense	COSM5676	158	2.29251	Pathogenic/Likely pathogenic​	Uncertain significance​	NA	NA	NA	NA	NA	0	1	0	1	1	1
CTNNB1	c.94G>A	p.D32N	41224606	Substitution - Missense	COSM5672	149	2.16193	Pathogenic​	Likely pathogenic	NA	NA	NA	NA	NA	0	14	0	1	1	1
CTNNB1	c.101G>T	p.G34V	41224613	Substitution - Missense	COSM5670	132	1.91526	Conflicting interpretations of pathogenicity​ Pathogenic(1); Likely pathogenic(10); Uncertain significance(1)	Likely pathogenic​	NA	NA	NA	NA	NA	0	1	0	1	1	1
CTNNB1	c.101G>A	p.G34E	41224613	Substitution - Missense	COSM5671	130	1.88624	Pathogenic/Likely pathogenic; other​	Uncertain significance​	NA	NA	NA	NA	NA	0	0	0	0	1	0
CTNNB1	c.95A>G	p.D32G	41224607	Substitution - Missense	COSM5681	120	1.74115	Pathogenic/Likely pathogenic​	Uncertain significance​	NA	NA	NA	NA	NA	0	0	1	0	1	1
CTNNB1	c.100G>A	p.G34R	41224612	Substitution - Missense	COSM5686	118	1.71213	Pathogenic/Likely pathogenic​	Uncertain significance​	NA	NA	NA	NA	NA	0	1	0	1	1	1
CTNNB1	c.97T>C	p.S33P	41224609	Substitution - Missense	COSM5682	97	1.40743	Likely pathogenic​	Uncertain significance​	NA	NA	NA	NA	NA	0	0	0	0	1	0
CTNNB1	c.98C>A	p.S33Y	41224610	Substitution - Missense	COSM5673	94	1.3639	Pathogenic/Likely pathogenic​	Uncertain significance​	NA	NA	NA	NA	NA	0	3	0	1	1	1
CTNNB1	c.109T>G	p.S37A	41224621	Substitution - Missense	COSM5675	85	1.23331	Likely pathogenic​	Uncertain significance​	NA	NA	NA	NA	NA	0	7	0	1	1	1
CTNNB1	c.95A>T	p.D32V	41224607	Substitution - Missense	COSM5691	79	1.14626	Likely pathogenic	Uncertain significance​	NA	NA	NA	NA	NA	0	0	0	0	1	0
CTNNB1	c.94G>C	p.D32H	41224606	Substitution - Missense	COSM5668	77	1.11724	Likely pathogenic​	Uncertain significance​	NA	NA	NA	NA	NA	0	0	0	0	1	0
CTNNB1	c.107A>C	p.H36P	41224619	Substitution - Missense	COSM5678	62	0.899594	NA	Uncertain significance​	NA	NA	NA	NA	NA	0	1	0	1	1	1
CTNNB1	c.110C>A	p.S37Y	41224622	Substitution - Missense	COSM5666	61	0.885084	Pathogenic/Likely pathogenic​	Uncertain significance​	NA	NA	NA	NA	NA	0	0	0	0	0	0
CTNNB1	c.104T>G	p.I35S	41224616	Substitution - Missense	COSM5674	60	0.870575	NA	Uncertain significance​	NA	NA	NA	NA	NA	0	0	0	0	0	0
CTNNB1	c.1004A>T	p.K335I	41227275	Substitution - Missense	COSM17797	49	0.710969	NA	Uncertain significance​	NA	NA	NA	NA	NA	0	1	0	1	1	1
CTNNB1	c.134C>A	p.S45Y	41224646	Substitution - Missense	COSM5692	46	0.667441	Pathogenic/Likely pathogenic​	Uncertain significance​	NA	NA	NA	NA	NA	0	0	1	0	1	1
CTNNB1	c.109T>C	p.S37P	41224621	Substitution - Missense	COSM5687	46	0.667441	Likely pathogenic​	Uncertain significance​	NA	NA	NA	NA	NA	0	0	0	0	0	0
CTNNB1	c.134C>G	p.S45C	41224646	Substitution - Missense	COSM5689	46	0.667441	Likely pathogenic​	Uncertain significance​	NA	NA	NA	NA	NA	0	0	0	0	0	0
CTNNB1	c.97T>G	p.S33A	41224609	Substitution - Missense	COSM5683	41	0.594893	Likely pathogenic​	Uncertain significance​	NA	NA	NA	NA	NA	0	0	0	0	0	0
CTNNB1	c.100G>C	p.G34R	41224612	Substitution - Missense	COSM5684	38	0.551364	Likely pathogenic​	Uncertain significance​	NA	NA	NA	NA	NA	0	3	0	1	1	1
CTNNB1	c.133T>G	p.S45A	41224645	Substitution - Missense	COSM5685	31	0.449797	Likely pathogenic​	Uncertain significance​	NA	NA	NA	NA	NA	0	0	0	0	0	0
CTNNB1	c.95A>C	p.D32A	41224607	Substitution - Missense	COSM5690	27	0.391759	Likely pathogenic​	Uncertain significance​	NA	NA	NA	NA	NA	0	0	0	0	0	0
CTNNB1	c.1161T>A	p.N387K	41233420	Substitution - Missense	COSM131449	25	0.362739	NA	Uncertain significance​	NA	NA	NA	NA	NA	0	0	0	0	0	0
CTNNB1	c.104T>C	p.I35T	41224616	Substitution - Missense	COSM13168	24	0.34823	NA	Uncertain significance​	NA	NA	NA	NA	NA	0	0	0	0	0	0
CTNNB1	c.1004A>C	p.K335T	41227275	Substitution - Missense	COSM1725761	20	0.290192	NA	Uncertain significance​	NA	NA	NA	NA	NA	0	0	0	0	0	0
CTNNB1	c.130C>G	p.P44A	41224642	Substitution - Missense	COSM17661	18	0.261172	NA	Uncertain significance​	NA	NA	NA	NA	NA	0	1	0	1	1	1
CTNNB1	c.1161T>G	p.N387K	41233420	Substitution - Missense	COSM188063	18	0.261172	NA	Uncertain significance​	NA	NA	NA	NA	NA	0	0	0	0	0	0
CTNNB1	c.122C>A	p.T41N	41224634	Substitution - Missense	COSM5730	15	0.217644	Likely pathogenic​	Uncertain significance​	NA	NA	NA	NA	NA	0	0	0	0	0	0
DICER1	c.5113G>A	p.E1705K	95094139	Substitution - Missense	COSM959251	56	3.9548	Conflicting interpretations of pathogenicity​ Pathogenic(1); Uncertain significance(1)	Likely pathogenic	NA	NA	NA	NA	NA	0	0	0	0	1	0
DICER1	c.5125G>A	p.D1709N	95094127	Substitution - Missense	COSM959249	55	3.88418	Pathogenic​	Likely pathogenic	NA	NA	NA	NA	NA	0	0	0	0	1	0
DICER1	c.5438A>G	p.E1813G	95091292	Substitution - Missense	COSM959244	33	2.33051	Conflicting interpretations of pathogenicity​ Pathogenic(1); Uncertain significance(1)	Likely pathogenic	NA	NA	NA	NA	NA	0	0	0	0	0	0
DICER1	c.5425G>A	p.G1809R	95091305	Substitution - Missense	COSM4169595	32	2.25989	Pathogenic​	Likely pathogenic	NA	NA	NA	NA	NA	0	0	0	0	0	0
DNMT3A	c.2645G>A	p.R882H	25234373	Substitution - Missense	COSM52944	905	28.7667	Conflicting interpretations of pathogenicity​ Pathogenic(2); Likely pathogenic(2); Uncertain significance(2)	Uncertain significance​	0.000424	0.000362	0.000318	0.000369	0.000424	0	0	0	0	1	0
DNMT3A	c.2644C>T	p.R882C	25234374	Substitution - Missense	COSM53042	398	12.651	Pathogenic​	Uncertain significance​	0.000138	7.7e-05	0.000177	0.000158	0.000177	0	0	0	0	0	0
EGFR	exon 19 any	exon 19 any	-	Deletion/insertion	-	-	-	NA	NA	NA	NA	NA	NA	NA	0	0	0	0	0	0
EGFR	exon 20 any	exon 20 any	-	Deletion/insertion	-	-	-	NA	NA	NA	NA	NA	NA	NA	0	0	0	0	0	0
EGFR	c.2573T>G	p.L858R	55191822	Substitution - Missense	COSM6224	2500	34.4923	drug response​	Likely pathogenic​	NA	NA	NA	NA	NA	0	37	2	1	1	1
EGFR	c.2235_2249del	p.E746_A750del	55174772..55174786	Deletion - In frame	COSM6223	1122	15.4801	Conflicting interpretations of pathogenicity​ Pathogenic(1); Uncertain significance(1)	NA	NA	NA	NA	NA	NA	0	13	58	1	1	1
EGFR	c.2236_2250del	p.E746_A750del	55174773..55174787	Deletion - In frame	COSM6225	535	7.38135	Pathogenic​	NA	NA	NA	NA	NA	NA	0	1	1	1	1	1
EGFR	c.2369C>T	p.T790M	55181378	Substitution - Missense	COSM6240	369	5.09106	drug response​	Likely pathogenic​	NA	NA	NA	4.6e-05	4.6e-05	0	50	10	1	1	1
EGFR	c.2582T>A	p.L861Q	55191831	Substitution - Missense	COSM6213	107	1.47627	Pathogenic/Likely pathogenic; drug response​	Likely pathogenic​	NA	NA	NA	NA	NA	0	11	7	1	1	1
EGFR	c.2156G>C	p.G719A	55174015	Substitution - Missense	COSM6239	71	0.979581	Pathogenic​	Likely pathogenic​	NA	NA	NA	NA	NA	0	2	4	1	1	1
EGFR	c.2155G>A	p.G719S	55174014	Substitution - Missense	COSM6252	59	0.814018	Uncertain significance; drug response​	Likely pathogenic​	NA	NA	NA	NA	NA	0	0	6	0	1	1
EGFR	c.2303G>T	p.S768I	55181312	Substitution - Missense	COSM6241	57	0.786424	Pathogenic​	Likely pathogenic​	NA	NA	NA	NA	NA	0	0	0	0	1	0
EGFR	c.866C>T	p.A289V	55154129	Substitution - Missense	COSM21687	55	0.75883	Likely pathogenic​	Likely pathogenic​	NA	NA	NA	NA	NA	0	13	1	1	1	1
EGFR	c.1793G>T	p.G598V	55165350	Substitution - Missense	COSM21690	47	0.648455	Likely pathogenic​	Uncertain significance​	NA	NA	NA	NA	NA	0	0	2	0	1	1
EGFR	c.2155G>T	p.G719C	55174014	Substitution - Missense	COSM6253	43	0.593267	Pathogenic/Likely pathogenic; drug response​	Likely pathogenic​	NA	NA	NA	NA	NA	0	0	0	0	0	0
EGFR	c.2125G>A	p.E709K	55173984	Substitution - Missense	COSM12988	33	0.455298	NA	Uncertain significance​	NA	NA	NA	NA	NA	0	0	0	0	0	0
EGFR	c.323G>A	p.R108K	55143387	Substitution - Missense	COSM5576118	31	0.427704	NA	Likely pathogenic​	NA	NA	NA	NA	NA	0	0	0	0	0	0
EGFR	c.865G>A	p.A289T	55154128	Substitution - Missense	COSM6356510	24	0.331126	Likely pathogenic​	Likely pathogenic​	NA	NA	NA	NA	NA	0	0	0	0	0	0
EGFR	c.2497T>G	p.L833V	55191746	Substitution - Missense	COSM13424	23	0.317329	Uncertain significance​	Uncertain significance​	NA	NA	NA	NA	NA	0	0	0	0	0	0
EGFR	c.2126A>C	p.E709A	55173985	Substitution - Missense	COSM13427	19	0.262141	Uncertain significance​	Uncertain significance​	NA	NA	NA	NA	NA	0	0	0	0	0	0
EGFR	c.664C>T	p.R222C	55152581	Substitution - Missense	COSM35508	18	0.248344	Uncertain significance​	Likely pathogenic​	NA	NA	NA	NA	NA	0	2	1	1	1	1
EGFR	c.1562G>A	p.R521K	55161562	Substitution - Missense	COSM3721608	16	0.220751	NA	Benign	0.621377	0.620487	0.622231	0.233122	0.622231	1	0	0	0	0	0
EGFR	c.2543C>T	p.P848L	55191792	Substitution - Missense	COSM22943	16	0.220751	Conflicting interpretations of pathogenicity​ Uncertain significance(3); Likely benign(3)	Uncertain significance​	NA	NA	NA	0.000256	0.000256	0	0	0	0	0	0
EGFR	c.185T>G	p.L62R	55142382	Substitution - Missense	COSM601589	15	0.206954	NA	Likely pathogenic​	NA	NA	NA	NA	NA	0	0	0	0	0	0
EGFR	c.2240T>C	p.L747S	55174777	Substitution - Missense	COSM26704	14	0.193157	Conflicting interpretations of pathogenicity​ Likely pathogenic(2); Uncertain significance(1)	Likely pathogenic​	NA	NA	NA	NA	NA	0	0	0	0	0	0
EGFR	c.2320G>A	p.V774M	55181329	Substitution - Missense	COSM13006	14	0.193157	NA	Likely pathogenic​	9e-06	1.3e-05	NA	NA	1.3e-05	0	0	0	0	0	0
EGFR	c.2504A>T	p.H835L	55191753	Substitution - Missense	COSM6227	11	0.151766	Uncertain significance​	Likely pathogenic	NA	NA	NA	NA	NA	0	0	0	0	0	0
EGFR	c.787A>C	p.T263P	55154050	Substitution - Missense	COSM21684	11	0.151766	Likely pathogenic​	Likely pathogenic	NA	NA	NA	NA	NA	0	0	0	0	0	0
EGFR	c.866C>A	p.A289D	55154129	Substitution - Missense	COSM21685	11	0.151766	Likely pathogenic​	Likely pathogenic​	NA	NA	NA	NA	NA	0	0	0	0	0	0
EGFR	c.2527G>A	p.V843I	55191776	Substitution - Missense	COSM85894	10	0.137969	Uncertain significance​	Uncertain significance​	0.00012	0.000129	0.000212	7e-06	0.000212	0	0	0	0	0	0
EGFR	c.2327G>A	p.R776H	55181336	Substitution - Missense	COSM22940	9	0.124172	Conflicting interpretations of pathogenicity​ Pathogenic(1); Likely pathogenic(1); Uncertain significance(2)	Uncertain significance​	NA	NA	NA	7e-06	7e-06	0	0	0	0	0	0
EGFR	c.754C>T	p.R252C	55154017	Substitution - Missense	COSM1559807	9	0.124172	NA	Likely pathogenic	NA	NA	NA	NA	NA	0	0	0	0	0	0
EGFR	c.340G>A	p.E114K	55143404	Substitution - Missense	COSM174732	8	0.110375	Uncertain significance​	Uncertain significance​	NA	NA	NA	7e-06	7e-06	0	0	0	0	0	0
ERBB2	c.929C>T	p.S310F	39711955	Substitution - Missense	COSM48358	175	8.13953	Likely pathogenic​	Uncertain significance​	NA	NA	NA	NA	NA	0	3	1	1	1	1
ERBB2	c.2264T>C	p.L755S	39723967	Substitution - Missense	COSM14060	159	7.39535	Likely pathogenic​	Likely pathogenic​	NA	NA	NA	NA	NA	0	0	0	0	1	0
ERBB2	c.2329G>T	p.V777L	39724747	Substitution - Missense	COSM14062	88	4.09302	Uncertain significance​	Likely pathogenic​	NA	NA	NA	NA	NA	0	1	0	1	1	1
ERBB2	c.2033G>A	p.R678Q	39723405	Substitution - Missense	COSM436498	86	4	Likely pathogenic	Uncertain significance​	NA	NA	NA	NA	NA	0	0	0	0	1	0
ERBB2	c.3508C>G	p.P1170A	39727784	Substitution - Missense	COSM5436892	76	3.53488	Benign​	Benign​	0.509622	0.507644	0.507573	0.522611	0.522611	1	0	0	0	0	0
ERBB2	c.2524G>A	p.V842I	39725079	Substitution - Missense	COSM14065	75	3.48837	Uncertain significance​	Likely pathogenic​	NA	NA	NA	NA	NA	0	1	0	1	1	1
ERBB2	c.929C>A	p.S310Y	39711955	Substitution - Missense	COSM94225	53	2.46512	Pathogenic​	Uncertain significance​	NA	NA	NA	NA	NA	0	1	0	1	1	1
ERBB2	c.1963A>G	p.I655V	39723335	Substitution - Missense	COSM4000121	46	2.13953	Benign​	Benign​	0.135568	0.134785	0.133388	0.174312	0.174312	1	0	0	0	0	0
ERBB2	c.2305G>T	p.D769Y	39724008	Substitution - Missense	COSM1251412	41	1.90698	Pathogenic/Likely pathogenic​	Likely pathogenic​	NA	NA	NA	NA	NA	0	1	0	1	1	1
ERBB2	c.2301C>G	p.I767M	39724004	Substitution - Missense	COSM51317	26	1.2093	NA	Uncertain significance​	NA	NA	NA	NA	NA	0	0	0	0	0	0
ERBB2	c.2329G>C	p.V777L	39724747	Substitution - Missense	COSM436500	23	1.06977	Likely pathogenic​	Uncertain significance​	NA	NA	NA	NA	NA	0	0	0	0	0	0
ERBB2	c.2606T>G	p.L869R	39725161	Substitution - Missense	COSM249793	18	0.837209	Pathogenic​	Likely pathogenic​	NA	NA	NA	NA	NA	0	0	0	0	0	0
ERBB2	c.2584A>G	p.T862A	39725139	Substitution - Missense	COSM88803	17	0.790698	NA	Uncertain significance​	NA	NA	NA	NA	NA	0	19	0	1	1	1
ERBB2	c.2305G>C	p.D769H	39724008	Substitution - Missense	COSM13170	15	0.697674	Pathogenic/Likely pathogenic​	Likely pathogenic​	NA	NA	NA	NA	NA	0	0	0	0	0	0
ERBB2	c.3647C>A	p.A1216D	39727923	Substitution - Missense	COSM7342251	14	0.651163	Benign​	Benign​	NA	NA	NA	0.00559	0.00559	0	0	0	0	0	0
ERBB2	c.2198C>T	p.T733I	39723650	Substitution - Missense	COSM14059	12	0.55814	NA	Uncertain significance​	NA	NA	NA	NA	NA	0	1	0	1	1	1
ERBB2	c.1960A>G	p.I654V	39723332	Substitution - Missense	COSM6854579	12	0.55814	Benign​	Likely benign	NA	NA	NA	0.00515	0.00515	0	0	0	0	0	0
ERBB2	c.2327G>T	p.G776V	39724745	Substitution - Missense	COSM18609	11	0.511628	not provided​	Uncertain significance​	NA	NA	NA	NA	NA	0	0	0	0	0	0
ERBB2	c.829G>T	p.D277Y	39710409	Substitution - Missense	COSM1749995	11	0.511628	NA	Uncertain significance​	NA	NA	NA	NA	NA	0	0	0	0	0	0
ERBB2	c.520C>T	p.H174Y	39709398	Substitution - Missense	COSM9102620	9	0.418605	NA	Uncertain significance​	NA	NA	NA	NA	NA	0	0	0	0	0	0
ERBB2	c.808G>T	p.A270S	39710388	Substitution - Missense	COSM5574359	9	0.418605	Likely benign	Likely benign	0.001151	0.001253	0.001309	0.000145	0.001309	0	0	0	0	0	0
ERBB2	c.1979G>A	p.G660D	39723351	Substitution - Missense	COSM4681497	8	0.372093	NA	Uncertain significance​	NA	NA	NA	NA	NA	0	8	1	1	1	1
ERBB2	c.3382G>A	p.V1128I	39727517	Substitution - Missense	COSM3378169	8	0.372093	Uncertain significance​	Uncertain significance​	9e-06	1.3e-05	NA	4.6e-05	4.6e-05	0	0	0	0	0	0
ERBB2	c.428G>A	p.R143Q	39708523	Substitution - Missense	COSM1382867	8	0.372093	Benign/Likely benign​	Likely benign​	0.014843	0.015676	0.014969	0.000322	0.015676	1	0	0	0	0	0
ERBB2	c.874G>C	p.G292R	39710454	Substitution - Missense	COSM4767524	8	0.372093	NA	Uncertain significance​	NA	NA	NA	NA	NA	0	0	0	0	0	0
ERBB2	c.2305G>A	p.D769N	39724008	Substitution - Missense	COSM1302747	7	0.325581	Likely pathogenic​	Likely pathogenic​	NA	NA	NA	NA	NA	0	0	0	0	0	0
ERBB2	c.2350C>T	p.R784C	39724768	Substitution - Missense	COSM24613	7	0.325581	NA	Uncertain significance​	NA	NA	NA	NA	NA	0	0	0	0	0	0
ERBB3	c.3348G>A	p.R1116=	56101207	Substitution - coding silent	COSM6849613	82	4.87805	Benign	Benign	0.322097	0.321368	0.318989	0.308257	0.322097	1	0	0	0	0	0
ERBB3	c.310G>A	p.V104M	56085070	Substitution - Missense	COSM20710	78	4.6401	Pathogenic/Likely pathogenic​	Likely pathogenic	1.8e-05	1.3e-05	NA	NA	1.8e-05	0	7	2	1	1	1
ERBB3	c.2783A>G	p.E928G	56098849	Substitution - Missense	COSM94228	57	3.39084	NA	Likely pathogenic	NA	NA	NA	NA	NA	0	0	0	0	1	0
ERBB3	c.310G>T	p.V104L	56085070	Substitution - Missense	COSM191840	43	2.558	Likely pathogenic	Likely pathogenic	NA	NA	NA	NA	NA	0	0	0	0	0	0
ERBB3	c.889G>T	p.D297Y	56088557	Substitution - Missense	COSM160822	32	1.90363	Likely pathogenic	Likely pathogenic	NA	NA	NA	NA	NA	0	0	0	0	1	0
ERBB3	c.850G>A	p.G284R	56088138	Substitution - Missense	COSM48360	31	1.84414	Likely pathogenic​	Likely pathogenic​	NA	NA	NA	NA	NA	0	0	0	0	1	0
ERBB3	c.695C>T	p.A232V	56087876	Substitution - Missense	COSM1242239	27	1.60619	NA	Likely pathogenic​	NA	NA	NA	NA	NA	0	0	0	0	0	0
ERBB3	c.3355A>T	p.S1119C	56101214	Substitution - Missense	COSM4989442	24	1.42772	Benign	Benign	9e-06	1.3e-05	NA	0.095176	0.095176	1	0	0	0	0	0
ERBB3	c.994G>A	p.E332K	56088753	Substitution - Missense	COSM254677	24	1.42772	NA	Likely pathogenic​	NA	NA	NA	NA	NA	0	0	0	0	0	0
ERBB3	c.2537G>T	p.S846I	56097861	Substitution - Missense	COSM176613	16	0.951814	NA	Uncertain significance​	NA	NA	NA	NA	NA	0	0	0	0	0	0
ERBB3	c.1423C>T	p.R475W	56093493	Substitution - Missense	COSM941493	13	0.773349	NA	Uncertain significance​	NA	NA	NA	NA	NA	0	0	0	0	0	0
ERBB3	c.985A>G	p.K329E	56088653	Substitution - Missense	COSM280844	13	0.773349	NA	Uncertain significance​	NA	NA	NA	NA	NA	0	0	0	0	0	0
ERBB3	c.2000G>A	p.R667H	56095751	Substitution - Missense	COSM1677075	11	0.654372	NA	Likely pathogenic​	NA	NA	NA	NA	NA	0	0	0	0	0	0
ERBB3	c.273G>A	p.M91I	56085033	Substitution - Missense	COSM122890	10	0.594884	NA	Uncertain significance​	NA	NA	NA	NA	NA	0	0	0	0	0	0
ERBB4	c.2131C>T	p.R711C	211623993	Substitution - Missense	COSM160827	22	0.938567	NA	Uncertain significance​	NA	NA	NA	NA	NA	0	0	0	0	0	0
ERBB4	c.316C>T	p.R106C	211947535	Substitution - Missense	COSM1205582	12	0.511945	NA	Likely pathogenic	NA	NA	NA	NA	NA	0	0	0	0	0	0
ERBB4	c.55A>G	p.T19A	212538476	Substitution - Missense	COSM4592166	11	0.469283	NA	Uncertain significance​	0.001575	0.00204	0.005415	NA	0.005415	0	0	0	0	0	0
ERBB4	c.1354G>A	p.E452K	211702102	Substitution - Missense	COSM131768	10	0.426621	Likely pathogenic	Likely pathogenic	NA	NA	NA	NA	NA	0	0	0	0	0	0
ERBB4	c.2512C>T	p.R838X	211431076	Substitution - Nonsense	COSM1578992	10	0.426621	NA	Pathogenic	NA	NA	NA	NA	NA	0	0	0	0	0	0
ERBB4	c.283C>T	p.R95C	211947568	Substitution - Missense	COSM2716441	10	0.426621	Uncertain significance​	Uncertain significance​	NA	NA	NA	2.6e-05	2.6e-05	0	0	0	0	0	0
ERCC2	c.934G>A	p.D312N	45364001	Substitution - Missense	COSM3749518	97	13.1793	Benign/Likely benign	Benign	0.035925	0.036135	0.035833	0.264706	0.036135	1	0	0	0	0	0
ERCC2	c.713A>G	p.N238S	45364429	Substitution - Missense	COSM418170	20	2.71739	NA	Uncertain significance​	NA	NA	NA	NA	NA	0	1	0	1	1	1
ERCC5	c.1586G>C	p.C529S	102862735	Substitution - Missense	COSM3736079	44	4.94382	Benign	Likely benign	0.061701	0.061296	0.061682	0.043678	0.061701	1	0	0	0	0	0
ERCC5	c.760A>G	p.M254V	102861594	Substitution - Missense	COSM4984943	29	3.25843	Benign	Likely benign	9e-06	1.3e-05	NA	0.025422	0.025422	1	0	0	0	0	0
ERCC5	c.641G>A	p.R214H	102858387	Substitution - Missense	COSM3793095	18	2.02247	Benign/Likely benign	Likely benign	NA	NA	NA	0.00324	0.00324	0	0	0	0	1	0
ERCC5	c.2636A>G	p.N879S	102868215	Substitution - Missense	COSM7342270	17	1.91011	Benign	Likely benign	5.5e-05	9e-05	3.5e-05	0.009334	0.009334	0	0	0	0	0	0
ERCC5	c.3310G>C	p.D1104H	102875652	Substitution - Missense	COSM3753566	11	1.23596	Benign	Benign	0.564952	0.566074	0.56699	0.302726	0.56699	1	0	0	0	0	0
ERCC5	c.3157G>C	p.G1053R	102875499	Substitution - Missense	COSM9118290	10	1.1236	Benign	Benign	0.999899	0.999923	1	0.997963	1	1	0	0	0	0	0
ESR1	c.908A>G	p.K303R	151944320	Substitution - Missense	COSM4745827	207	15.6463	risk factor​	Uncertain significance​	NA	NA	NA	NA	NA	0	1	0	1	1	1
ESR1	c.1613A>G	p.D538G	152098791	Substitution - Missense	COSM94250	167	12.6228	NA	Uncertain significance​	NA	NA	NA	NA	NA	0	0	0	0	0	0
ESR1	c.1610A>C	p.Y537S	152098788	Substitution - Missense	COSM1074639	85	6.42479	NA	Uncertain significance​	NA	NA	NA	NA	NA	0	0	0	0	0	0
ESR1	c.1138G>C	p.E380Q	152011697	Substitution - Missense	COSM3829320	53	4.00605	Likely pathogenic​	Uncertain significance​	NA	NA	NA	NA	NA	0	0	0	0	0	0
ESR1	c.1610A>G	p.Y537C	152098788	Substitution - Missense	COSM1074637	46	3.47695	NA	Uncertain significance​	NA	NA	NA	NA	NA	0	0	0	0	0	0
ESR1	c.1609T>A	p.Y537N	152098787	Substitution - Missense	COSM1074635	31	2.34316	NA	Uncertain significance​	NA	NA	NA	NA	NA	0	0	0	0	0	0
ESR1	c.1607T>A	p.L536H	152098785	Substitution - Missense	COSM6843697	13	0.982615	NA	Likely pathogenic	NA	NA	NA	NA	NA	0	0	0	0	0	0
ESR1	c.739G>A	p.E247K	151880750	Substitution - Missense	COSM280867	12	0.907029	NA	Uncertain significance​	3.7e-05	2.6e-05	NA	NA	3.7e-05	0	0	0	0	0	0
ESR1	c.1387T>C	p.S463P	152094402	Substitution - Missense	COSM4771561	9	0.680272	Pathogenic	Likely pathogenic	NA	NA	NA	NA	NA	0	0	0	0	0	0
ESR1	c.932C>T	p.T311M	151944344	Substitution - Missense	COSM206426	9	0.680272	NA	Uncertain significance​	9e-06	1.3e-05	NA	7e-06	1.3e-05	0	0	0	0	0	0
ESR1	c.1688C>T	p.T563M	152098866	Substitution - Missense	COSM216739	6	0.453515	NA	Uncertain significance​	NA	NA	NA	2.6e-05	2.6e-05	0	0	0	0	0	0
EZH2	c.1937A>T	p.Y646F	148811635	Substitution - Missense	COSM37028	130	8.99032	Likely pathogenic	Likely pathogenic	NA	NA	NA	NA	NA	0	6	1	1	1	1
EZH2	c.1936T>A	p.Y646N	148811636	Substitution - Missense	COSM37031	126	8.71369	Likely pathogenic	Likely pathogenic	NA	NA	NA	NA	NA	0	1	1	1	1	1
EZH2	c.1937A>C	p.Y646S	148811635	Substitution - Missense	COSM37029	63	4.35685	Likely pathogenic	Likely pathogenic	NA	NA	NA	NA	NA	0	0	10	0	1	1
EZH2	c.1936T>C	p.Y646H	148811636	Substitution - Missense	COSM37030	47	3.25035	Likely pathogenic	Likely pathogenic	NA	NA	NA	NA	NA	0	0	1	0	1	1
EZH2	c.2045C>G	p.A682G	148809375	Substitution - Missense	COSM220386	14	0.968188	Likely pathogenic​	Likely pathogenic	NA	NA	NA	NA	NA	0	0	1	0	1	1
EZH2	c.2075C>T	p.A692V	148809345	Substitution - Missense	COSM220529	9	0.622407	NA	Likely pathogenic	NA	NA	NA	NA	NA	0	0	1	0	1	1
FANCA	c.2151G>T	p.M717I	89771678	Substitution - Missense	COSM3755238	31	2.98077	Benign/Likely benign​	Likely benign	NA	NA	NA	0.02218	0.02218	1	0	0	0	0	0
FANCA	c.4303G>C	p.A1435P	89738666	Substitution - Missense	COSM4591376	13	1.25	NA	Uncertain significance​	NA	NA	NA	NA	NA	0	0	0	0	1	0
FANCA	c.1501G>A	p.G501S	89783072	Substitution - Missense	COSM4984954	12	1.15385	Benign​	Benign​	0.842001	0.842114	0.840848	0.513366	0.842114	1	0	0	0	0	0
FANCA	c.2426G>A	p.G809D	89769915	Substitution - Missense	COSM435949	11	1.05769	Benign/Likely benign​	Benign​	0.975959	0.976086	0.975476	0.472231	0.976086	1	0	0	0	0	0
FBXW7	c.1393C>T	p.R465C	152328233	Substitution - Missense	COSM22932	251	9.98806	Pathogenic	Likely pathogenic​	NA	NA	NA	NA	NA	0	0	0	0	1	0
FBXW7	c.1394G>A	p.R465H	152328232	Substitution - Missense	COSM22965	219	8.71468	Likely pathogenic	Likely pathogenic​	NA	NA	NA	NA	NA	0	1	0	1	1	1
FBXW7	c.1513C>T	p.R505C	152326137	Substitution - Missense	COSM22975	184	7.32193	Likely pathogenic​	Likely pathogenic​	NA	NA	NA	NA	NA	0	4	0	1	1	1
FBXW7	c.1436G>A	p.R479Q	152326214	Substitution - Missense	COSM22974	138	5.49144	Likely pathogenic​	Likely pathogenic​	NA	NA	NA	NA	NA	0	1	0	1	1	1
FBXW7	c.1745C>T	p.S582L	152324294	Substitution - Missense	COSM22979	59	2.34779	NA	Uncertain significance​	NA	NA	NA	NA	NA	0	0	0	0	1	0
FBXW7	c.1513C>G	p.R505G	152326137	Substitution - Missense	COSM99603	55	2.18862	Likely pathogenic​	Likely pathogenic​	NA	NA	NA	NA	NA	0	1	0	1	1	1
FBXW7	c.2065C>T	p.R689W	152322940	Substitution - Missense	COSM27083	51	2.02945	Pathogenic	Uncertain significance​	NA	NA	NA	NA	NA	0	11	0	1	1	1
FBXW7	c.832C>T	p.R278X	152337831	Substitution - Nonsense	COSM22971	46	1.83048	Likely pathogenic​	Pathogenic​	NA	NA	NA	7e-06	7e-06	0	0	0	0	1	0
FBXW7	c.1099C>T	p.R367X	152330755	Substitution - Nonsense	COSM22964	39	1.55193	Uncertain significance	Pathogenic​	NA	NA	NA	NA	NA	0	0	0	0	1	0
FBXW7	c.1972C>T	p.R658X	152323033	Substitution - Nonsense	COSM22967	39	1.55193	NA	Uncertain significance​	NA	NA	NA	NA	NA	0	0	0	0	0	0
FBXW7	c.1268G>T	p.G423V	152328358	Substitution - Missense	COSM22984	33	1.31317	NA	Uncertain significance​	NA	NA	NA	NA	NA	0	0	0	0	0	0
FBXW7	c.1514G>A	p.R505H	152326136	Substitution - Missense	COSM25812	27	1.07441	Uncertain significance	Likely pathogenic	NA	NA	NA	NA	NA	0	0	0	0	0	0
FBXW7	c.1435C>G	p.R479G	152326215	Substitution - Missense	COSM22966	22	0.875448	Likely pathogenic	Likely pathogenic	NA	NA	NA	NA	NA	0	0	0	0	0	0
FBXW7	c.1514G>T	p.R505L	152326136	Substitution - Missense	COSM23000	21	0.835655	Likely pathogenic​	Likely pathogenic	NA	NA	NA	NA	NA	0	0	0	0	0	0
FBXW7	c.1177C>T	p.R393X	152329731	Substitution - Nonsense	COSM22973	20	0.795862	Pathogenic	Pathogenic​	NA	NA	NA	NA	NA	0	0	0	0	0	0
FBXW7	c.1435C>T	p.R479X	152326215	Substitution - Nonsense	COSM206696	19	0.756068	NA	Pathogenic​	NA	NA	NA	NA	NA	0	0	0	0	0	0
FBXW7	c.1634A>G	p.Y545C	152326016	Substitution - Missense	COSM22989	18	0.716275	NA	Uncertain significance​	NA	NA	NA	NA	NA	0	1	1	1	1	1
FBXW7	c.1429G>A	p.G477S	152326221	Substitution - Missense	COSM327078	18	0.716275	NA	Likely pathogenic	NA	NA	NA	NA	NA	0	0	0	0	0	0
FBXW7	c.2077G>A	p.E693K	152322928	Substitution - Missense	COSM22936	16	0.636689	NA	Uncertain significance​	NA	NA	NA	NA	NA	0	0	0	0	0	0
FBXW7	c.1436G>C	p.R479P	152326214	Substitution - Missense	COSM420169	14	0.557103	Likely pathogenic​	Likely pathogenic	NA	NA	NA	NA	NA	0	0	0	0	0	0
FBXW7	c.1436G>T	p.R479L	152326214	Substitution - Missense	COSM27058	14	0.557103	Likely pathogenic​	Likely pathogenic	NA	NA	NA	NA	NA	0	0	0	0	0	0
FBXW7	c.1385C>T	p.S462F	152328241	Substitution - Missense	COSM1177864	13	0.51731	NA	Uncertain significance​	NA	NA	NA	NA	NA	0	0	0	0	0	0
FBXW7	c.2066G>A	p.R689Q	152322939	Substitution - Missense	COSM302214	12	0.477517	Pathogenic	Uncertain significance​	NA	NA	NA	NA	NA	0	0	0	0	0	0
FBXW7	c.670C>T	p.R224X	152346986	Substitution - Nonsense	COSM22970	12	0.477517	Pathogenic​	Pathogenic​	NA	NA	NA	NA	NA	0	0	0	0	0	0
FBXW7	c.1513C>A	p.R505S	152326137	Substitution - Missense	COSM33763	11	0.437724	Likely pathogenic	Likely pathogenic	NA	NA	NA	NA	NA	0	0	0	0	0	0
FBXW7	c.1322G>A	p.R441Q	152328304	Substitution - Missense	COSM1052091	10	0.397931	NA	Uncertain significance​	NA	NA	NA	NA	NA	0	0	0	0	0	0
FBXW7	c.664C>T	p.R222X	152346992	Substitution - Nonsense	COSM1206878	10	0.397931	NA	Pathogenic	NA	NA	NA	NA	NA	0	0	0	0	0	0
FBXW7	c.1627A>G	p.R543G	152326023	Substitution - Missense	COSM123128	9	0.358138	NA	Uncertain significance​	NA	NA	NA	NA	NA	0	1	2	1	1	1
FBXW7	c.1973G>A	p.R658Q	152323032	Substitution - Missense	COSM206684	9	0.358138	Likely pathogenic​	Likely pathogenic	NA	NA	NA	7e-06	7e-06	0	0	0	0	0	0
FBXW7	c.41G>A	p.R14Q	152411763	Substitution - Missense	COSM206731	9	0.358138	NA	Uncertain significance​	NA	NA	NA	1.3e-05	1.3e-05	0	0	0	0	0	0
FBXW7	c.1394G>T	p.R465L	152328232	Substitution - Missense	COSM33762	8	0.318345	Likely pathogenic​	Likely pathogenic	NA	NA	NA	NA	NA	0	0	0	0	0	0
FBXW7	c.1558G>A	p.D520N	152326092	Substitution - Missense	COSM30598	8	0.318345	NA	Likely pathogenic	NA	NA	NA	NA	NA	0	0	0	0	0	0
FGFR2	c.755C>G	p.S252W	121520163	Substitution - Missense	COSM36903	87	7.55208	Pathogenic	Likely pathogenic​	NA	NA	NA	NA	NA	0	0	1	0	1	1
FGFR2	c.1650T>A	p.N550K	121498520	Substitution - Missense	COSM36912	46	3.99306	NA	Uncertain significance​	NA	NA	NA	NA	NA	0	3	1	1	1	1
FGFR2	c.1147T>C	p.C383R	121515260	Substitution - Missense	COSM36906	29	2.51736	NA	Uncertain significance​	NA	NA	NA	NA	NA	0	0	0	0	1	0
FGFR2	c.1127A>G	p.Y376C	121515280	Substitution - Missense	COSM36904	18	1.5625	NA	Likely pathogenic​	NA	NA	NA	NA	NA	0	0	0	0	1	0
FGFR2	c.1650T>G	p.N550K	121498520	Substitution - Missense	COSM36902	17	1.47569	NA	Uncertain significance​	NA	NA	NA	NA	NA	0	0	0	0	1	0
FGFR2	c.1978A>G	p.K660E	121488002	Substitution - Missense	COSM36909	13	1.12847	NA	Likely pathogenic​	NA	NA	NA	NA	NA	0	0	0	0	0	0
FGFR2	c.758C>G	p.P253R	121520160	Substitution - Missense	COSM49170	13	1.12847	Pathogenic/Likely pathogenic​	Likely pathogenic​	NA	NA	NA	NA	NA	0	0	0	0	0	0
FGFR2	c.2183A>G	p.N728S	121485410	Substitution - Missense	COSM6854598	12	1.04167	NA	Uncertain significance​	NA	NA	NA	2e-05	2e-05	0	0	0	0	0	0
FGFR2	c.629G>A	p.R210Q	121538711	Substitution - Missense	COSM174986	10	0.868056	NA	Uncertain significance​	NA	NA	NA	NA	NA	0	0	0	0	0	0
FGFR2	c.870G>C	p.W290C	121520048	Substitution - Missense	COSM41286	10	0.868056	Pathogenic​	Likely pathogenic​	NA	NA	NA	NA	NA	0	0	0	0	0	0
FGFR3	c.746C>G	p.S249C	1801841	Substitution - Missense	COSM715	1525	41.429	Pathogenic	Pathogenic​	NA	NA	NA	NA	NA	0	1	0	1	1	1
FGFR3	c.1124A>G	p.Y375C	1804372	Substitution - Missense	COSM718	479	13.0128	NA	Uncertain significance​	NA	NA	NA	NA	NA	0	3	1	1	1	1
FGFR3	c.742C>T	p.R248C	1801837	Substitution - Missense	COSM714	305	8.28579	Pathogenic​	Likely pathogenic​	NA	NA	NA	NA	NA	0	1	0	1	1	1
FLT3	c.2503G>T	p.D835Y	28018505	Substitution - Missense	COSM783	362	18.2921	Pathogenic​	Likely pathogenic​	NA	NA	NA	NA	NA	0	0	0	0	1	0
FLT3	c.2504A>T	p.D835V	28018504	Substitution - Missense	COSM784	93	4.69934	Pathogenic​	Likely pathogenic​	NA	NA	NA	NA	NA	0	0	0	0	1	0
FLT3	c.2503G>C	p.D835H	28018505	Substitution - Missense	COSM785	80	4.04245	Pathogenic	Likely pathogenic	NA	NA	NA	NA	NA	0	0	0	0	1	0
FLT3	c.680C>T	p.T227M	28050157	Substitution - Missense	COSM5019176	62	3.1329	Benign​	Benign​	0.7614	0.760551	0.760174	0.532428	0.7614	1	0	0	0	0	0
FLT3	c.2028C>A	p.N676K	28028203	Substitution - Missense	COSM303886	39	1.97069	Likely pathogenic	Likely pathogenic	NA	NA	NA	NA	NA	0	0	0	0	0	0
FLT3	c.2505T>G	p.D835E	28018503	Substitution - Missense	COSM788	39	1.97069	Pathogenic	Likely pathogenic	NA	NA	NA	NA	NA	0	0	0	0	0	0
FOXA1	c.526A>G	p.I176V	37592258	Substitution - Missense	COSM1477557	19	2.83582	NA	Uncertain significance​	NA	NA	NA	NA	NA	0	0	0	0	0	0
FOXA1	c.749C>T	p.S250F	37592035	Substitution - Missense	COSM433050	19	2.83582	NA	Uncertain significance​	NA	NA	NA	NA	NA	0	0	0	0	1	0
FOXA1	c.798C>G	p.F266L	37591986	Substitution - Missense	COSM4423699	16	2.38806	NA	Uncertain significance​	NA	NA	NA	NA	NA	0	0	0	0	0	0
FOXA1	c.676G>A	p.D226N	37592108	Substitution - Missense	COSM242528	15	2.23881	NA	Uncertain significance​	NA	NA	NA	NA	NA	0	0	0	0	0	0
FOXL2	c.402C>G	p.C134W	138946321	Substitution - Missense	COSM33661	842	99.645	not provided​	Uncertain significance​	NA	NA	NA	NA	NA	0	1	0	1	1	1
FOXP1	c.1343C>T	p.S448L	70977833	Substitution - Missense	COSM1207455	14	2.78884	Likely benign	Uncertain significance​	NA	NA	NA	7e-06	7e-06	0	0	0	0	1	0
FOXP1	c.97C>T	p.R33W	71198285	Substitution - Missense	COSM3597315	7	1.39442	NA	Uncertain significance​	9e-06	NA	NA	7e-06	9e-06	0	0	0	0	0	0
FOXP1	c.106C>T	p.R36W	71198276	Substitution - Missense	COSM195466	5	0.996016	NA	Uncertain significance​	9e-06	1.3e-05	NA	7e-06	1.3e-05	0	0	0	0	0	0
GNA11	c.626A>T	p.Q209L	3118944	Substitution - Missense	COSM52969	321	47.4852	Pathogenic/Likely pathogenic​	Uncertain significance​	NA	NA	NA	NA	NA	0	0	0	0	1	0
GNA11	c.547C>T	p.R183C	3115014	Substitution - Missense	COSM21651	23	3.40237	Pathogenic	Uncertain significance​	NA	NA	NA	NA	NA	0	0	0	0	0	0
GNAQ	c.626A>T	p.Q209L	77794572	Substitution - Missense	COSM28757	297	29.3478	Pathogenic/Likely pathogenic	Uncertain significance​	NA	NA	NA	NA	NA	0	0	0	0	1	0
GNAQ	c.626A>C	p.Q209P	77794572	Substitution - Missense	COSM28758	212	20.9486	Pathogenic/Likely pathogenic​	Uncertain significance​	NA	NA	NA	NA	NA	0	0	0	0	1	0
GNAQ	c.286A>T	p.T96S	77922196	Substitution - Missense	COSM404628	59	5.83004	NA	Uncertain significance​	NA	NA	NA	NA	NA	0	0	0	0	0	0
GNAQ	c.548G>A	p.R183Q	77797577	Substitution - Missense	COSM52975	48	4.74308	Pathogenic/Likely pathogenic​	Likely pathogenic​	NA	NA	NA	NA	NA	0	0	0	0	0	0
GNAS	c.2530C>T	p.R844C	58909365	Substitution - Missense	COSM27887	839	30.9138	NA	Pathogenic​	1.8e-05	2.6e-05	NA	1.3e-05	2.6e-05	0	0	0	0	0	0
GNAS	c.2531G>A	p.R844H	58909366	Substitution - Missense	COSM27895	716	26.3817	NA	Pathogenic​	5.5e-05	6.5e-05	NA	1.3e-05	6.5e-05	0	23	0	1	1	1
H3F3A	c.83A>T	p.K28M	226064434	Substitution - Missense	COSM327928	408	61.1694	NA	Likely pathogenic​	NA	NA	NA	NA	NA	0	0	0	0	1	0
H3F3A	c.103G>T	p.G35W	226064454	Substitution - Missense	COSM1732355	90	13.4933	NA	Uncertain significance​	NA	NA	NA	NA	NA	0	0	0	0	1	0
H3F3A	c.103G>A	p.G35R	226064454	Substitution - Missense	COSM327929	46	6.89655	NA	Uncertain significance​	NA	NA	NA	NA	NA	0	0	0	0	1	0
H3F3B	c.110A>T	p.K37M	75779065	Substitution - Missense	COSM4440720	31	11.1913	NA	Uncertain significance​	NA	NA	NA	NA	NA	0	0	0	0	1	0
HRAS	c.37G>C	p.G13R	534286	Substitution - Missense	COSM486	403	18.8582	NA	Likely pathogenic​	NA	NA	NA	NA	NA	0	1	0	1	1	1
HRAS	c.182A>G	p.Q61R	533874	Substitution - Missense	COSM499	348	16.2845	Likely pathogenic​	Likely pathogenic​	NA	NA	NA	NA	NA	0	2	6	1	1	1
HRAS	c.35G>T	p.G12V	534288	Substitution - Missense	COSM483	264	12.3538	NA	Likely pathogenic​	NA	NA	NA	NA	NA	0	0	2	0	1	1
HRAS	c.182A>T	p.Q61L	533874	Substitution - Missense	COSM498	194	9.07815	Uncertain significance	Likely pathogenic​	NA	NA	NA	NA	NA	0	0	6	0	1	1
HRAS	c.181C>A	p.Q61K	533875	Substitution - Missense	COSM496	154	7.20636	Pathogenic/Likely pathogenic	Likely pathogenic​	NA	NA	NA	NA	NA	0	1	0	1	1	1
HRAS	c.34G>A	p.G12S	534289	Substitution - Missense	COSM480	124	5.80253	NA	Uncertain significance​	NA	NA	NA	NA	NA	0	1	0	1	1	1
HRAS	c.35G>A	p.G12D	534288	Substitution - Missense	COSM484	102	4.77305	NA	Likely pathogenic​	NA	NA	NA	NA	NA	0	0	2	0	1	1
HRAS	c.81T>C	p.H27=	534242	Substitution - coding silent	COSM249860	60	2.80767	Benign	Benign	0.169048	0.169921	0.166478	0.340665	0.340665	1	0	0	0	0	0
HRAS	c.38G>T	p.G13V	534285	Substitution - Missense	COSM489	50	2.33973	Pathogenic​	Likely pathogenic​	NA	NA	NA	NA	NA	0	0	1	0	1	1
HRAS	c.34G>T	p.G12C	534289	Substitution - Missense	COSM481	45	2.10576	Pathogenic​	Likely pathogenic​	NA	NA	NA	NA	NA	0	0	1	0	1	1
HRAS	c.38G>A	p.G13D	534285	Substitution - Missense	COSM490	41	1.91858	Pathogenic​	Likely pathogenic​	NA	NA	NA	NA	NA	0	0	1	0	1	1
HRAS	c.37G>A	p.G13S	534286	Substitution - Missense	COSM487	25	1.16986	Likely pathogenic	Uncertain significance​	NA	NA	NA	NA	NA	0	0	0	0	0	0
HRAS	c.183G>T	p.Q61H	533873	Substitution - Missense	COSM502	17	0.795508	Likely pathogenic	Uncertain significance​	NA	NA	NA	NA	NA	0	0	0	0	0	0
HRAS	c.34G>C	p.G12R	534289	Substitution - Missense	COSM482	16	0.748713	Likely pathogenic	Likely pathogenic	NA	NA	NA	NA	NA	0	0	1	0	1	1
HRAS	c.35G>C	p.G12A	534288	Substitution - Missense	COSM485	14	0.655124	Pathogenic​	Likely pathogenic​	NA	NA	NA	NA	NA	0	0	0	0	0	0
HRAS	c.37G>T	p.G13C	534286	Substitution - Missense	COSM488	12	0.561535	Pathogenic​	Likely pathogenic​	NA	NA	NA	NA	NA	0	0	0	0	0	0
HRAS	c.175G>A	p.A59T	533881	Substitution - Missense	COSM495	11	0.51474	Likely pathogenic​	Likely pathogenic​	NA	NA	NA	NA	NA	0	2	0	1	1	1
HRAS	c.351G>C	p.K117N	533552	Substitution - Missense	COSM254733	8	0.374357	NA	Uncertain significance​	NA	NA	NA	NA	NA	0	0	0	0	0	0
HRAS	c.351G>T	p.K117N	533552	Substitution - Missense	COSM304967	7	0.327562	NA	Uncertain significance​	NA	NA	NA	NA	NA	0	0	0	0	0	0
IDH1	c.395G>A	p.R132H	208248388	Substitution - Missense	COSM28746	5145	72.2917	Pathogenic/Likely pathogenic	Likely pathogenic​	NA	NA	NA	1.3e-05	1.3e-05	0	1	0	1	1	1
IDH1	c.394C>T	p.R132C	208248389	Substitution - Missense	COSM28747	1015	14.2616	Pathogenic/Likely pathogenic​	Likely pathogenic​	NA	NA	NA	7e-06	7e-06	0	0	0	0	0	0
IDH1	c.394C>G	p.R132G	208248389	Substitution - Missense	COSM28749	239	3.35816	Pathogenic/Likely pathogenic	Likely pathogenic​	NA	NA	NA	NA	NA	0	2	0	1	1	1
IDH1	c.394C>A	p.R132S	208248389	Substitution - Missense	COSM28748	200	2.81017	Pathogenic/Likely pathogenic​	Likely pathogenic​	NA	NA	NA	NA	NA	0	0	0	0	1	0
IDH1	c.395G>T	p.R132L	208248388	Substitution - Missense	COSM28750	134	1.88282	Pathogenic/Likely pathogenic​	Likely pathogenic​	NA	NA	NA	NA	NA	0	0	0	0	0	0
IDH2	c.419G>A	p.R140Q	90088702	Substitution - Missense	COSM41590	817	47.8337	Pathogenic/Likely pathogenic	Uncertain significance​	2.8e-05	2.6e-05	NA	6.6e-05	6.6e-05	0	0	1	0	1	1
IDH2	c.515G>A	p.R172K	90088606	Substitution - Missense	COSM33733	387	22.6581	Pathogenic/Likely pathogenic; risk factor	Likely pathogenic​	NA	NA	NA	NA	NA	0	0	0	0	1	0
IDH2	c.516G>T	p.R172S	90088605	Substitution - Missense	COSM34090	52	3.0445	NA	Likely pathogenic​	NA	NA	NA	NA	NA	0	0	0	0	0	0
IDH2	c.515G>T	p.R172M	90088606	Substitution - Missense	COSM33732	42	2.45902	Pathogenic/Likely pathogenic; risk factor​	Likely pathogenic​	NA	NA	NA	NA	NA	0	0	0	0	1	0
IDH2	c.514A>G	p.R172G	90088607	Substitution - Missense	COSM33731	38	2.22482	Likely pathogenic	Uncertain significance​	NA	NA	NA	NA	NA	0	0	0	0	0	0
IDH2	c.514A>T	p.R172W	90088607	Substitution - Missense	COSM34039	37	2.16628	Likely pathogenic; risk factor​	Uncertain significance​	NA	NA	NA	NA	NA	0	0	0	0	0	0
IDH2	c.516G>C	p.R172S	90088605	Substitution - Missense	COSM133672	30	1.75644	Pathogenic; risk factor	Uncertain significance​	NA	NA	NA	NA	NA	0	0	0	0	0	0
IDH2	c.418C>T	p.R140W	90088703	Substitution - Missense	COSM41877	22	1.28806	Uncertain significance	Likely pathogenic​	NA	NA	NA	NA	NA	0	0	0	0	0	0
IRF4	c.176A>G	p.K59R	393328	Substitution - Missense	COSM5710109	29	5.48204	NA	Uncertain significance​	NA	NA	NA	NA	NA	0	0	0	0	1	0
IRF4	c.208C>G	p.L70V	393360	Substitution - Missense	COSM4610567	20	3.78072	NA	Uncertain significance​	NA	NA	NA	NA	NA	0	0	0	0	0	0
JAK2	c.1849G>T	p.V617F	5073770	Substitution - Missense	COSM12600	42758	97.4186	Pathogenic/Likely pathogenic​	Pathogenic	0.000313	0.000336	0.000248	0.000362	0.000362	0	0	5	0	1	1
JAK3	c.1533G>A	p.M511I	17838299	Substitution - Missense	COSM51374	49	4.40647	NA	Uncertain significance​	NA	NA	NA	NA	NA	0	0	0	0	1	0
JAK3	c.1970G>A	p.R657Q	17835160	Substitution - Missense	COSM35864	35	3.40798	Uncertain significance​	Likely pathogenic	NA	NA	NA	NA	NA	0	0	0	0	1	0
JAK3	c.2164G>A	p.V722I	17834887	Substitution - Missense	COSM34213	36	3.38664	Benign/Likely benign	Likely benign	NA	NA	NA	0.0075	0.0075	0	0	0	0	1	0
KDR	c.1416A>T	p.Q472H	55106807	Substitution - Missense	COSM149673	95	5.11853	not provided	Benign	0.406797	0.40633	0.406929	0.203685	0.406929	1	0	0	0	0	0
KDR	c.889G>A	p.V297I	55113391	Substitution - Missense	COSM1131107	32	1.72414	not provided	Benign	0.108525	0.107384	0.108429	0.137595	0.137595	1	0	0	0	0	0
KDR	c.3095G>A	p.R1032Q	55090053	Substitution - Missense	COSM192176	18	0.969828	NA	Uncertain significance​	NA	NA	NA	NA	NA	0	0	0	0	0	0
KDR	c.1040G>A	p.R347H	55110705	Substitution - Missense	COSM327102	12	0.646552	NA	Uncertain significance​	NA	NA	NA	2.6e-05	2.6e-05	0	0	0	0	0	0
KIT	c.2447A>T	p.D816V	54733155	Substitution - Missense	COSM1314	966	27.3345	NA	Uncertain significance​	NA	NA	NA	NA	NA	0	12	0	1	1	1
KIT	c.1727T>C	p.L576P	54727495	Substitution - Missense	COSM1290	139	3.93322	Pathogenic/Likely pathogenic​	Likely pathogenic​	NA	NA	NA	NA	NA	0	0	9	0	1	1
KIT	c.1676T>A	p.V559D	54727444	Substitution - Missense	COSM1252	84	2.37691	NA	Likely pathogenic​	NA	NA	NA	NA	NA	0	0	0	0	1	0
KIT	c.2446G>T	p.D816Y	54733154	Substitution - Missense	COSM1310	79	2.23543	NA	Likely pathogenic​	NA	NA	NA	NA	NA	0	0	0	0	1	0
KIT	c.2446G>C	p.D816H	54733154	Substitution - Missense	COSM1311	75	2.12224	NA	Likely pathogenic​	NA	NA	NA	NA	NA	0	1	0	1	1	1
KIT	c.1924A>G	p.K642E	54728055	Substitution - Missense	COSM1304	64	1.81098	Pathogenic	Likely pathogenic​	NA	NA	NA	NA	NA	0	0	0	0	1	0
KIT	c.1679T>A	p.V560D	54727447	Substitution - Missense	COSM1257	61	1.72609	NA	Likely pathogenic​	NA	NA	NA	NA	NA	0	0	0	0	0	0
KIT	c.2466T>G	p.N822K	54733174	Substitution - Missense	COSM1322	56	1.58461	NA	Likely pathogenic​	NA	NA	NA	NA	NA	0	1	0	1	1	1
KIT	c.1621A>C	p.M541L	54727298	Substitution - Missense	COSM28026	56	1.58461	Benign/Likely benign​	Benign	0.046233	0.046486	0.046535	0.077242	0.077242	1	0	0	0	0	0
KIT	c.1961T>C	p.V654A	54728092	Substitution - Missense	COSM12706	49	1.38653	Uncertain significance​	Likely pathogenic​	NA	NA	NA	NA	NA	0	1	0	1	1	1
KIT	c.2466T>A	p.N822K	54733174	Substitution - Missense	COSM1321	49	1.38653	Conflicting interpretations of pathogenicity ​Pathogenic(1); Uncertain significance(1)	Likely pathogenic​	NA	NA	NA	NA	NA	0	0	0	0	0	0
KIT	c.1669T>G	p.W557G	54727437	Substitution - Missense	COSM1221	30	0.848896	Uncertain significance	Likely pathogenic​	NA	NA	NA	NA	NA	0	0	0	0	0	0
KIT	c.1676T>C	p.V559A	54727444	Substitution - Missense	COSM1255	28	0.792303	NA	Likely pathogenic​	NA	NA	NA	NA	NA	0	0	0	0	0	0
KRAS	c.35G>A	p.G12D	25245350	Substitution - Missense	COSM521	15326	34.0087	Pathogenic	Pathogenic	NA	NA	NA	1.3e-05	1.3e-05	0	349	125	1	1	1
KRAS	c.35G>T	p.G12V	25245350	Substitution - Missense	COSM520	10450	23.1887	NA	Likely pathogenic​	NA	NA	NA	NA	NA	0	258	61	1	1	1
KRAS	c.38G>A	p.G13D	25245347	Substitution - Missense	COSM532	5711	12.6728	NA	Likely pathogenic​	NA	NA	NA	2e-05	2e-05	0	46	8	1	1	1
KRAS	c.34G>T	p.G12C	25245351	Substitution - Missense	COSM516	5182	11.4989	NA	Pathogenic	NA	NA	NA	NA	NA	0	35	53	1	1	1
KRAS	c.35G>C	p.G12A	25245350	Substitution - Missense	COSM522	2436	5.40553	Pathogenic/Likely pathogenic​	Likely pathogenic​	NA	NA	NA	NA	NA	0	7	10	1	1	1
KRAS	c.34G>A	p.G12S	25245351	Substitution - Missense	COSM517	2021	4.48463	NA	Uncertain significance​	NA	NA	NA	NA	NA	0	24	43	1	1	1
KRAS	c.34G>C	p.G12R	25245351	Substitution - Missense	COSM518	1494	3.31521	Pathogenic/Likely pathogenic​	Likely pathogenic​	NA	NA	NA	NA	NA	0	3	8	1	1	1
KRAS	c.37G>T	p.G13C	25245348	Substitution - Missense	COSM527	383	0.849884	Pathogenic/Likely pathogenic​	Likely pathogenic​	NA	NA	NA	NA	NA	0	0	2	0	1	1
KRAS	c.183A>C	p.Q61H	25227341	Substitution - Missense	COSM554	289	0.641296	Conflicting interpretations of pathogenicity Pathogenic(1); Uncertain significance(2)	Likely pathogenic​	NA	NA	NA	NA	NA	0	19	1	1	1	1
KRAS	c.436G>A	p.A146T	25225628	Substitution - Missense	COSM19404	237	0.525907	Conflicting interpretations of pathogenicity​ Pathogenic(1); Likely pathogenic(1); Uncertain significance(2)	Likely pathogenic​	NA	NA	NA	7e-06	7e-06	0	2	0	1	1	1
KRAS	c.182A>G	p.Q61R	25227342	Substitution - Missense	COSM552	150	0.332853	Conflicting interpretations of pathogenicity ​Pathogenic(1); Uncertain significance(2)	Likely pathogenic​	NA	NA	NA	NA	NA	0	0	0	0	1	0
KRAS	c.182A>T	p.Q61L	25227342	Substitution - Missense	COSM553	133	0.295129	Pathogenic​	Likely pathogenic​	NA	NA	NA	NA	NA	0	2	1	1	1	1
KRAS	c.183A>T	p.Q61H	25227341	Substitution - Missense	COSM555	125	0.277377	Pathogenic/Likely pathogenic	Likely pathogenic​	NA	NA	NA	NA	NA	0	35	1	1	1	1
KRAS	c.37G>A	p.G13S	25245348	Substitution - Missense	COSM528	89	0.197493	Pathogenic	Likely pathogenic​	NA	NA	NA	NA	NA	0	0	0	0	1	0
KRAS	c.37G>C	p.G13R	25245348	Substitution - Missense	COSM529	70	0.155331	NA	Likely pathogenic​	NA	NA	NA	NA	NA	0	0	0	0	1	0
KRAS	c.437C>T	p.A146V	25225627	Substitution - Missense	COSM19900	67	0.148674	Pathogenic​	Likely pathogenic​	NA	NA	NA	7e-06	7e-06	0	0	0	0	0	0
KRAS	c.181C>A	p.Q61K	25227343	Substitution - Missense	COSM549	62	0.137579	NA	Likely pathogenic​	NA	NA	NA	NA	NA	0	0	0	0	1	0
KRAS	c.38G>C	p.G13A	25245347	Substitution - Missense	COSM533	40	0.0887607	Pathogenic	Likely pathogenic​	NA	NA	NA	NA	NA	0	0	0	0	0	0
KRAS	c.38G>T	p.G13V	25245347	Substitution - Missense	COSM534	37	0.0821036	Pathogenic	Likely pathogenic​	NA	NA	NA	NA	NA	0	0	0	0	0	0
KRAS	c.351A>T	p.K117N	25225713	Substitution - Missense	COSM28519	35	0.0776656	Pathogenic	Uncertain significance​	NA	NA	NA	NA	NA	0	1	0	1	1	1
KRAS	c.175G>A	p.A59T	25227349	Substitution - Missense	COSM546	29	0.0643515	Pathogenic/Likely pathogenic​	Likely pathogenic​	NA	NA	NA	NA	NA	0	0	0	0	0	0
KRAS	c.40G>A	p.V14I	25245345	Substitution - Missense	COSM12722	28	0.0621325	NA	Pathogenic	NA	NA	NA	NA	NA	0	0	0	0	0	0
KRAS	c.64C>A	p.Q22K	25245321	Substitution - Missense	COSM543	24	0.0532564	Likely pathogenic	Likely pathogenic​	NA	NA	NA	NA	NA	0	0	0	0	0	0
KRAS	c.182A>C	p.Q61P	25227342	Substitution - Missense	COSM551	23	0.0510374	Pathogenic/Likely pathogenic​	Likely pathogenic​	NA	NA	NA	NA	NA	0	0	0	0	0	0
KRAS	c.351A>C	p.K117N	25225713	Substitution - Missense	COSM19940	20	0.0443803	Pathogenic​	Uncertain significance​	NA	NA	NA	NA	NA	0	0	0	0	0	0
KRAS	c.436G>C	p.A146P	25225628	Substitution - Missense	COSM19905	20	0.0443803	Pathogenic/Likely pathogenic	Likely pathogenic​	NA	NA	NA	7e-06	7e-06	0	0	0	0	0	0
KRAS	c.57G>T	p.L19F	25245328	Substitution - Missense	COSM20818	20	0.0443803	Likely pathogenic	Likely pathogenic​	NA	NA	NA	NA	NA	0	0	0	0	0	0
KRAS	c.57G>C	p.L19F	25245328	Substitution - Missense	COSM12703	19	0.0421613	Pathogenic/Likely pathogenic​	Likely pathogenic​	NA	NA	NA	NA	NA	0	0	0	0	0	0
KRAS	c.53C>A	p.A18D	25245332	Substitution - Missense	COSM542	14	0.0310662	NA	Uncertain significance​	NA	NA	NA	NA	NA	0	0	0	0	0	0
KRAS	c.173C>T	p.T58I	25227351	Substitution - Missense	COSM87288	13	0.0288472	NA	Likely pathogenic​	NA	NA	NA	NA	NA	0	0	0	0	0	0
KRAS	c.179G>A	p.G60D	25227345	Substitution - Missense	COSM87290	12	0.0266282	NA	Likely pathogenic​	NA	NA	NA	NA	NA	0	0	0	0	0	0
KRAS	c.187G>A	p.E63K	25227337	Substitution - Missense	COSM27159	12	0.0266282	Uncertain significance	Uncertain significance​	NA	NA	NA	NA	NA	0	0	0	0	0	0
KRAS	c.28G>A	p.G10R	25245357	Substitution - Missense	COSM1360887	11	0.0244092	NA	Uncertain significance​	NA	NA	NA	NA	NA	0	0	0	0	0	0
KRAS	c.176C>G	p.A59G	25227348	Substitution - Missense	COSM28518	10	0.0221902	NA	Uncertain significance​	NA	NA	NA	7e-06	7e-06	0	0	0	0	0	0
KRAS	c.181C>G	p.Q61E	25227343	Substitution - Missense	COSM550	10	0.0221902	Likely pathogenic	Likely pathogenic​	NA	NA	NA	NA	NA	0	0	0	0	0	0
MAP2K1	c.370C>T	p.P124S	66436824	Substitution - Missense	COSM235614	45	7.24638	Pathogenic​	Likely pathogenic​	NA	NA	NA	NA	NA	0	0	0	0	1	0
MAP2K1	c.171G>T	p.K57N	66435117	Substitution - Missense	COSM1235478	27	4.34783	Pathogenic​	Uncertain significance​	NA	NA	NA	NA	NA	0	1	0	1	1	1
MAP2K1	c.167A>C	p.Q56P	66435113	Substitution - Missense	COSM1235481	27	4.34783	Pathogenic​	Uncertain significance​	NA	NA	NA	NA	NA	0	0	0	0	1	0
MAP2K1	c.607G>A	p.E203K	66481793	Substitution - Missense	COSM232755	25	4.02576	Likely pathogenic​	Likely pathogenic​	NA	NA	NA	NA	NA	0	0	0	0	1	0
MAP2K1	c.371C>T	p.P124L	66436825	Substitution - Missense	COSM1315861	15	2.41546	Pathogenic/Likely pathogenic	Likely pathogenic​	NA	NA	NA	NA	NA	0	0	0	0	0	0
MAP2K1	c.383G>A	p.G128D	66436837	Substitution - Missense	COSM1374186	15	2.41546	Likely pathogenic​	Likely pathogenic​	NA	NA	NA	NA	NA	0	0	0	0	0	0
MAP2K1	c.199G>A	p.D67N	66435145	Substitution - Missense	COSM1678546	14	2.25443	Pathogenic​	Uncertain significance​	NA	NA	NA	NA	NA	0	0	0	0	0	0
MAP2K1	c.361T>A	p.C121S	66436815	Substitution - Missense	COSM555601	10	1.61031	Likely pathogenic​	Likely pathogenic​	NA	NA	NA	NA	NA	0	0	0	0	0	0
MAPK1	c.964G>A	p.E322K	21772875	Substitution - Missense	COSM461148	41	17.0124	Likely pathogenic	Likely pathogenic​	NA	NA	NA	NA	NA	0	0	0	0	1	0
MAPK1	c.961G>A	p.D321N	21772878	Substitution - Missense	COSM98175	6	2.48963	NA	Uncertain significance​	NA	NA	NA	NA	NA	0	0	0	0	0	0
MAPK1	c.404G>A	p.R135K	21805938	Substitution - Missense	COSM3308981	5	2.07469	NA	Likely pathogenic​	NA	NA	NA	NA	NA	0	0	0	0	0	0
MAX	c.179G>A	p.R60Q	65078029	Substitution - Missense	COSM166665	54	25.9615	Uncertain significance	Uncertain significance​	NA	NA	NA	NA	NA	0	9	0	1	1	1
MAX	c.223C>T	p.R75X	65077985	Substitution - Nonsense	COSM1757292	9	4.32692	Pathogenic	Pathogenic	NA	NA	NA	NA	NA	0	0	0	0	1	0
MAX	c.83A>G	p.H28R	65093796	Substitution - Missense	COSM957096	9	4.32692	NA	Uncertain significance​	NA	NA	NA	NA	NA	0	0	0	0	1	0
MED12	c.131G>A	p.G44D	71119404	Substitution - Missense	COSM131596	798	20.223	other​	Uncertain significance​	NA	NA	NA	NA	NA	0	0	0	0	1	0
MED12	c.130G>A	p.G44S	71119403	Substitution - Missense	COSM131594	402	10.1875	other	Uncertain significance​	NA	NA	NA	NA	NA	0	0	0	0	1	0
MET	c.3029C>T	p.T1010I	116771936	Substitution - Missense	COSM707	55	3.08989	NA	Benign​	NA	NA	NA	0.008814	0.008814	0	0	0	0	1	0
MET	c.3757T>G	p.Y1253D	116783374	Substitution - Missense	COSM700	47	2.64045	NA	Likely pathogenic​	NA	NA	NA	NA	NA	0	0	0	0	0	0
MET	c.1124A>G	p.N375S	116700208	Substitution - Missense	COSM5020653	35	1.96629	Benign​	Benign​	0.037669	0.037356	0.037158	0.019403	0.037669	1	0	0	0	0	0
MLH1	c.655A>G	p.I219V	37012077	Substitution - Missense	COSM1131469	71	9.64674	Benign	Benign	0.049639	0.049494	0.051808	0.226704	0.226704	1	0	0	0	0	0
MLH1	c.1151T>A	p.V384D	37025749	Substitution - Missense	COSM26085	49	6.65761	Benign​	Benign​	0.034225	0.034128	0.033513	0.001055	0.034225	1	2	0	1	1	1
MPL	c.1544G>T	p.W515L	43349338	Substitution - Missense	COSM18918	275	31.4645	Conflicting interpretations of pathogenicity Pathogenic(1); Uncertain significance(1)	Uncertain significance​	NA	NA	NA	NA	NA	0	0	1	0	1	1
MSH2	c.965G>A	p.G322D	47416318	Substitution - Missense	COSM26086	22	2.86086	Benign	Likely benign	NA	NA	NA	0.012422	0.012422	1	0	0	0	0	0
MSH2	c.1738G>T	p.E580X	47471041	Substitution - Nonsense	COSM276127	12	1.56047	Pathogenic	Pathogenic	NA	NA	NA	NA	NA	0	0	0	0	1	0
MSH2	c.2038C>T	p.R680X	47476399	Substitution - Nonsense	COSM27628	10	1.30039	Pathogenic​	Pathogenic​	NA	NA	NA	NA	NA	0	0	0	0	0	0
MSH6	c.276A>G	p.P92=	47790942	Substitution - coding silent	COSM4133863	141	9.80529	Benign​	Benign​	NA	NA	3.5e-05	0.143406	0.143406	1	0	0	0	0	0
MSH6	c.3261del	p.F1088Sfs*2	47803508	Deletion - Frameshift	COSM13395	88	6.11961	Pathogenic​	NA	NA	NA	NA	NA	NA	0	8	1	1	1	1
MSH6	c.3261dup	p.F1088Lfs*5	47803508..47803509	Insertion - Frameshift	COSM13394	74	5.14604	Pathogenic​	NA	NA	NA	NA	NA	NA	0	0	0	0	0	0
MSH6	c.116G>A	p.G39E	47783349	Substitution - Missense	COSM3749667	15	1.04312	Benign​	Benign​	0.315822	0.315625	0.315717	0.188797	0.315822	1	0	0	0	0	0
MTOR	c.5553C>T	p.S1851=	11130589	Substitution - coding silent	COSM3996746	34	1.59027	Benign​	Benign	0.117399	0.117582	0.118338	0.281822	0.281822	1	0	0	0	0	0
MTOR	c.6909G>A	p.L2303=	11121270	Substitution - coding silent	COSM3996743	29	1.35641	Benign	Benign	0.062419	0.061929	0.060585	0.278243	0.278243	1	0	0	0	0	0
MTOR	c.6644C>A	p.S2215Y	11124516	Substitution - Missense	COSM20417	28	1.30964	Pathogenic	Likely pathogenic​	NA	NA	NA	NA	NA	0	0	0	0	1	0
MTOR	c.6644C>T	p.S2215F	11124516	Substitution - Missense	COSM1686998	23	1.07577	Pathogenic​	Likely pathogenic​	NA	NA	NA	NA	NA	0	0	0	0	0	0
MTOR	c.5395G>A	p.E1799K	11130747	Substitution - Missense	COSM180789	20	0.935454	Pathogenic	Uncertain significance​	NA	NA	NA	NA	NA	0	0	0	0	0	0
MTOR	c.5930C>A	p.T1977K	11128107	Substitution - Missense	COSM462601	15	0.70159	Pathogenic	Likely pathogenic​	NA	NA	NA	NA	NA	0	0	0	0	0	0
MTOR	c.4379T>C	p.L1460P	11157242	Substitution - Missense	COSM462618	12	0.561272	NA	Likely pathogenic​	NA	NA	NA	NA	NA	0	0	0	0	0	0
MTOR	c.7280T>A	p.L2427Q	11114338	Substitution - Missense	COSM1185313	11	0.5145	Pathogenic	Likely pathogenic​	NA	NA	NA	NA	NA	0	0	0	0	0	0
MTOR	c.7280T>G	p.L2427R	11114338	Substitution - Missense	COSM2119114	11	0.5145	NA	Likely pathogenic​	NA	NA	NA	NA	NA	0	0	0	0	0	0
MTOR	c.5930C>G	p.T1977R	11128107	Substitution - Missense	COSM462602	10	0.467727	Pathogenic	Likely pathogenic​	NA	NA	NA	NA	NA	0	0	0	0	0	0
MTOR	c.6016G>T	p.V2006F	11128021	Substitution - Missense	COSM249481	10	0.467727	NA	Uncertain significance​	NA	NA	NA	NA	NA	0	0	0	0	0	0
MTOR	c.7255G>A	p.E2419K	11114363	Substitution - Missense	COSM4187184	10	0.467727	Pathogenic​	Likely pathogenic​	NA	NA	NA	NA	NA	0	0	0	0	0	0
MTOR	c.5930C>T	p.T1977I	11128107	Substitution - Missense	COSM6241477	9	0.420954	Pathogenic​	Likely pathogenic​	NA	NA	NA	NA	NA	0	0	0	0	0	0
MYC	c.77A>G	p.N26S	127738294	Substitution - Missense	COSM5019917	44	3.15638	Uncertain significance	Uncertain significance​	1.8e-05	1.3e-05	NA	0.023992	0.023992	1	0	0	0	0	0
MYC	c.482C>T	p.S161L	127738699	Substitution - Missense	COSM1454792	31	2.22382	NA	Uncertain significance​	NA	NA	NA	NA	NA	0	1	0	1	1	1
MYC	c.221C>T	p.P74L	127738438	Substitution - Missense	COSM1166663	21	1.50646	NA	Likely pathogenic​	NA	NA	NA	NA	NA	0	0	0	0	1	0
MYCN	c.131C>T	p.P44L	15942195	Substitution - Missense	COSM35624	83	18.7783	Likely pathogenic	Uncertain significance​	NA	NA	NA	NA	NA	0	0	0	0	1	0
MYCN	c.1333G>A	p.E445K	15946035	Substitution - Missense	COSM3300603	8	1.80995	NA	Uncertain significance​	NA	NA	NA	NA	NA	0	0	0	0	0	0
MYCN	c.1118G>A	p.R373Q	15945820	Substitution - Missense	COSM166938	7	1.58371	NA	Uncertain significance​	NA	NA	NA	NA	NA	0	0	0	0	0	0
MYCN	c.904C>T	p.R302C	15945606	Substitution - Missense	COSM1400351	7	1.58371	NA	Uncertain significance​	NA	NA	NA	NA	NA	0	0	0	0	0	0
MYD88	c.818T>C	p.L273P	38141150	Substitution - Missense	COSM85940	1980	88.314	NA	NA	NA	NA	NA	NA	NA	0	24	1	1	1	1
NF2	c.169C>T	p.R57X	29636805	Substitution - Nonsense	COSM21991	42	5.09091	Pathogenic	Pathogenic	NA	NA	NA	NA	NA	0	0	0	0	1	0
NF2	c.1021C>T	p.R341X	29671847	Substitution - Nonsense	COSM21990	32	3.87879	Pathogenic	Pathogenic	NA	NA	NA	NA	NA	0	0	0	0	1	0
NFE2L2	c.235G>C	p.E79Q	177234082	Substitution - Missense	COSM120958	31	4.37236	Likely pathogenic​	Likely pathogenic​	NA	NA	NA	NA	NA	0	1	2	1	1	1
NFE2L2	c.85G>C	p.D29H	177234232	Substitution - Missense	COSM124736	27	3.80818	Likely pathogenic	Likely pathogenic	NA	NA	NA	NA	NA	0	0	0	0	1	0
NFE2L2	c.101G>A	p.R34Q	177234216	Substitution - Missense	COSM132849	26	3.66714	NA	Uncertain significance​	NA	NA	NA	NA	NA	0	0	0	0	1	0
NFE2L2	c.235G>A	p.E79K	177234082	Substitution - Missense	COSM132851	26	3.66714	Pathogenic/Likely pathogenic​	Pathogenic/Likely pathogenic​	NA	NA	NA	NA	NA	0	0	0	0	1	0
NFE2L2	c.100C>G	p.R34G	177234217	Substitution - Missense	COSM132847	25	3.52609	NA	Uncertain significance​	NA	NA	NA	NA	NA	0	0	0	0	1	0
NFE2L2	c.86A>G	p.D29G	177234231	Substitution - Missense	COSM132858	19	2.67983	Likely pathogenic	Likely pathogenic	NA	NA	NA	NA	NA	0	1	0	1	1	1
NFE2L2	c.246A>T	p.E82D	177234071	Substitution - Missense	COSM132860	16	2.2567	Likely pathogenic​	Uncertain significance​	NA	NA	NA	NA	NA	0	1	0	1	1	1
NFE2L2	c.101G>C	p.R34P	177234216	Substitution - Missense	COSM132848	15	2.11566	NA	Uncertain significance​	NA	NA	NA	NA	NA	0	0	0	0	1	0
NFE2L2	c.230A>G	p.D77G	177234087	Substitution - Missense	COSM132850	15	2.11566	NA	Uncertain significance​	NA	NA	NA	NA	NA	0	0	0	0	1	0
NFE2L2	c.88C>T	p.L30F	177234229	Substitution - Missense	COSM132854	14	1.97461	NA	Uncertain significance​	NA	NA	NA	NA	NA	0	0	0	0	1	0
NFE2L2	c.92G>C	p.G31A	177234225	Substitution - Missense	COSM132956	14	1.97461	NA	Uncertain significance​	NA	NA	NA	NA	NA	0	0	0	0	1	0
NFE2L2	c.92G>A	p.G31E	177234225	Substitution - Missense	COSM1613738	13	1.83357	NA	Uncertain significance​	NA	NA	NA	NA	NA	0	0	0	0	1	0
NFE2L2	c.245A>G	p.E82G	177234072	Substitution - Missense	COSM132853	11	1.55148	Uncertain significance​	Uncertain significance​	NA	NA	NA	NA	NA	0	0	0	0	1	0
NFE2L2	c.246A>C	p.E82D	177234071	Substitution - Missense	COSM251434	9	1.26939	NA	Uncertain significance​	NA	NA	NA	NA	NA	0	0	0	0	0	0
NFE2L2	c.85G>A	p.D29N	177234232	Substitution - Missense	COSM124735	9	1.26939	Likely pathogenic	Likely pathogenic	NA	NA	NA	NA	NA	0	0	0	0	0	0
NFE2L2	c.70T>C	p.W24R	177234247	Substitution - Missense	COSM132985	8	1.12835	Uncertain significance​	Uncertain significance​	NA	NA	NA	NA	NA	0	13	0	1	1	1
NFE2L2	c.72G>C	p.W24C	177234245	Substitution - Missense	COSM132852	8	1.12835	NA	Uncertain significance​	NA	NA	NA	NA	NA	0	9	0	1	1	1
NFE2L2	c.242G>A	p.G81D	177234075	Substitution - Missense	COSM132957	8	1.12835	Uncertain significance	NA	NA	NA	NA	NA	NA	0	0	0	0	0	0
NFE2L2	c.244G>C	p.E82Q	177234073	Substitution - Missense	COSM131265	8	1.12835	NA	Uncertain significance​	NA	NA	NA	NA	NA	0	0	0	0	0	0
NFE2L2	c.83T>C	p.I28T	177234234	Substitution - Missense	COSM132855	8	1.12835	NA	Uncertain significance​	NA	NA	NA	NA	NA	0	0	0	0	0	0
NFE2L2	c.89T>G	p.L30R	177234228	Substitution - Missense	COSM133706	8	1.12835	NA	Uncertain significance​	NA	NA	NA	NA	NA	0	0	0	0	0	0
NFE2L2	c.241G>A	p.G81S	177234076	Substitution - Missense	COSM717624	7	0.987306	Pathogenic	Likely pathogenic​	NA	NA	NA	NA	NA	0	1	0	1	1	1
NFE2L2	c.242G>T	p.G81V	177234075	Substitution - Missense	COSM132961	7	0.987306	NA	NA	NA	NA	NA	NA	NA	0	1	3	1	1	1
NFE2L2	c.85G>T	p.D29Y	177234232	Substitution - Missense	COSM132845	7	0.987306	Likely pathogenic​	Likely pathogenic​	NA	NA	NA	NA	NA	0	1	3	1	1	1
NFE2L2	c.1495C>T	p.R499W	177231108	Substitution - Missense	COSM1009926	7	0.987306	NA	Likely pathogenic​	NA	NA	NA	NA	NA	0	0	0	0	0	0
NFE2L2	c.230A>T	p.D77V	177234087	Substitution - Missense	COSM132859	7	0.987306	NA	Uncertain significance​	NA	NA	NA	NA	NA	0	0	0	0	0	0
NFE2L2	c.239C>A	p.T80K	177234078	Substitution - Missense	COSM132964	6	0.846262	Pathogenic​	Likely pathogenic​	NA	NA	NA	NA	NA	0	1	0	1	1	1
NFE2L2	c.239C>G	p.T80R	177234078	Substitution - Missense	COSM132861	6	0.846262	NA	Likely pathogenic​	NA	NA	NA	NA	NA	0	3	0	1	1	1
NFE2L2	c.80A>G	p.D27G	177234237	Substitution - Missense	COSM3714050	6	0.846262	NA	Uncertain significance​	NA	NA	NA	NA	NA	0	1	0	1	1	1
NFE2L2	c.91G>A	p.G31R	177234226	Substitution - Missense	COSM88002	6	0.846262	Pathogenic/Likely pathogenic	Likely pathogenic​	NA	NA	NA	NA	NA	0	0	0	0	0	0
NFE2L2	c.238A>C	p.T80P	177234079	Substitution - Missense	COSM132988	5	0.705219	NA	Uncertain significance​	NA	NA	NA	NA	NA	0	0	0	0	0	0
NFE2L2	c.238A>G	p.T80A	177234079	Substitution - Missense	COSM3961573	5	0.705219	NA	Uncertain significance​	NA	NA	NA	NA	NA	0	0	0	0	0	0
NFE2L2	c.241G>C	p.G81R	177234076	Substitution - Missense	COSM5437128	5	0.705219	NA	Likely pathogenic​	NA	NA	NA	NA	NA	0	0	0	0	0	0
NFE2L2	c.1705C>T	p.R569C	177230898	Substitution - Missense	COSM6444817	4	0.564175	Uncertain significance​	Uncertain significance​	NA	NA	NA	7e-06	7e-06	0	0	0	0	0	0
NFE2L2	c.229G>C	p.D77H	177234088	Substitution - Missense	COSM4831205	4	0.564175	NA	Uncertain significance​	NA	NA	NA	NA	NA	0	0	0	0	0	0
NFE2L2	c.236A>G	p.E79G	177234081	Substitution - Missense	COSM132960	4	0.564175	NA	Uncertain significance​	NA	NA	NA	NA	NA	0	0	0	0	0	0
NFE2L2	c.245A>T	p.E82V	177234072	Substitution - Missense	COSM132962	4	0.564175	NA	Uncertain significance​	NA	NA	NA	NA	NA	0	0	0	0	0	0
NFE2L2	c.68T>G	p.L23R	177234249	Substitution - Missense	COSM1613740	4	0.564175	NA	Uncertain significance​	NA	NA	NA	NA	NA	0	0	0	0	0	0
NFE2L2	c.76C>A	p.Q26K	177234241	Substitution - Missense	COSM1009931	4	0.564175	NA	Uncertain significance​	NA	NA	NA	NA	NA	0	0	0	0	0	0
NFE2L2	c.79G>T	p.D27Y	177234238	Substitution - Missense	COSM132966	4	0.564175	NA	Uncertain significance​	NA	NA	NA	NA	NA	0	0	0	0	0	0
NFE2L2	c.95T>G	p.V32G	177234222	Substitution - Missense	COSM132846	4	0.564175	NA	Uncertain significance​	NA	NA	NA	NA	NA	0	0	0	0	0	0
NFE2L2	c.101G>T	p.R34L	177234216	Substitution - Missense	COSM3961574	3	0.423131	NA	Uncertain significance​	NA	NA	NA	NA	NA	0	0	0	0	0	0
NFE2L2	c.1706G>A	p.R569H	177230897	Substitution - Missense	COSM4706717	3	0.423131	Uncertain significance​	Uncertain significance​	9e-06	NA	NA	1.3e-05	1.3e-05	0	0	0	0	0	0
NFE2L2	c.229G>T	p.D77Y	177234088	Substitution - Missense	COSM2894777	3	0.423131	NA	Uncertain significance​	NA	NA	NA	NA	NA	0	0	0	0	0	0
NFE2L2	c.236A>T	p.E79V	177234081	Substitution - Missense	COSM1529470	3	0.423131	Likely pathogenic​	Uncertain significance​	NA	NA	NA	NA	NA	0	0	0	0	1	0
NFE2L2	c.239C>T	p.T80I	177234078	Substitution - Missense	COSM132857	3	0.423131	NA	Uncertain significance​	NA	NA	NA	NA	NA	0	0	0	0	0	0
NFE2L2	c.241G>T	p.G81C	177234076	Substitution - Missense	COSM1009929	3	0.423131	NA	Likely pathogenic​	NA	NA	NA	NA	NA	0	0	0	0	0	0
NFE2L2	c.77A>C	p.Q26P	177234240	Substitution - Missense	COSM717622	3	0.423131	NA	Uncertain significance​	NA	NA	NA	NA	NA	0	0	0	0	0	0
NFE2L2	c.92G>T	p.G31V	177234225	Substitution - Missense	COSM1259060	3	0.423131	NA	Uncertain significance​	NA	NA	NA	NA	NA	0	0	0	0	0	0
NFE2L2	c.235G>T	p.E79X	177234082	Substitution - Nonsense	COSM1631472	2	0.282087	Uncertain significance​	Pathogenic	NA	NA	NA	NA	NA	0	0	0	0	0	0
NOTCH1	c.7541_7542del	p.P2514Rfs*4	136496197..136496198	Deletion - Frameshift	COSM12774	590	10.9446	Uncertain significance​	NA	NA	NA	NA	NA	NA	0	0	1	0	1	1
NRAS	c.182A>G	p.Q61R	114713908	Substitution - Missense	COSM584	1844	27.058	Pathogenic​	Likely pathogenic	NA	NA	NA	NA	NA	0	0	1	0	1	1
NRAS	c.181C>A	p.Q61K	114713909	Substitution - Missense	COSM580	1405	20.6163	NA	Likely pathogenic	NA	NA	NA	NA	NA	0	1	0	1	1	1
NRAS	c.35G>A	p.G12D	114716126	Substitution - Missense	COSM564	950	13.9398	Pathogenic/Likely pathogenic	Pathogenic​	NA	NA	NA	1.3e-05	1.3e-05	0	0	18	0	1	1
NRAS	c.38G>A	p.G13D	114716123	Substitution - Missense	COSM573	433	6.35363	Pathogenic/Likely pathogenic​	Pathogenic​	NA	NA	NA	NA	NA	0	2	0	1	1	1
NRAS	c.182A>T	p.Q61L	114713908	Substitution - Missense	COSM583	359	5.26779	Uncertain significance​	Likely pathogenic	NA	NA	NA	NA	NA	0	0	8	0	1	1
NRAS	c.34G>A	p.G12S	114716127	Substitution - Missense	COSM563	285	4.18195	Pathogenic​	Likely pathogenic	NA	NA	NA	NA	NA	0	2	1	1	1	1
NRAS	c.34G>T	p.G12C	114716127	Substitution - Missense	COSM562	211	3.09611	Pathogenic	Likely pathogenic	NA	NA	NA	NA	NA	0	0	1	0	1	1
NRAS	c.37G>C	p.G13R	114716124	Substitution - Missense	COSM569	192	2.81731	NA	Likely pathogenic	NA	NA	NA	NA	NA	0	26	1	1	1	1
NRAS	c.183A>T	p.Q61H	114713907	Substitution - Missense	COSM585	135	1.98092	Conflicting interpretations of pathogenicity ​Pathogenic(1); Uncertain significance(1)	Likely pathogenic	NA	NA	NA	NA	NA	0	0	1	0	1	1
NRAS	c.35G>T	p.G12V	114716126	Substitution - Missense	COSM566	134	1.96625	Pathogenic/Likely pathogenic	Likely pathogenic	NA	NA	NA	NA	NA	0	1	15	1	1	1
NRAS	c.35G>C	p.G12A	114716126	Substitution - Missense	COSM565	127	1.86354	Pathogenic/Likely pathogenic​	Likely pathogenic	NA	NA	NA	NA	NA	0	0	6	0	1	1
NRAS	c.38G>T	p.G13V	114716123	Substitution - Missense	COSM574	106	1.55539	Pathogenic/Likely pathogenic	Likely pathogenic	NA	NA	NA	NA	NA	0	0	0	0	0	0
NRAS	c.183A>C	p.Q61H	114713907	Substitution - Missense	COSM586	104	1.52605	Pathogenic/Likely pathogenic​	Likely pathogenic	NA	NA	NA	NA	NA	0	0	0	0	0	0
NRAS	c.34G>C	p.G12R	114716127	Substitution - Missense	COSM561	50	0.733676	Pathogenic	Likely pathogenic	NA	NA	NA	NA	NA	0	0	0	0	0	0
NT5C2	c.1100G>A	p.R367Q	103093198	Substitution - Missense	COSM914303	42	14.2373	NA	Uncertain significance​	NA	NA	NA	NA	NA	0	0	0	0	1	0
PBRM1	c.2211A>G	p.T737=	52609669	Substitution - coding silent	COSM1566683	119	6.71179	NA	Benign	0.532793	0.533257	0.532097	0.34257	0.532793	1	0	0	0	0	0
PBRM1	c.4335A>G	p.P1445=	52550771	Substitution - coding silent	COSM4002743	118	6.65539	NA	Benign	0.534713	0.535238	0.533902	0.342368	0.535238	1	0	0	0	0	0
PBRM1	c.3522A>T	p.P1174=	52576635	Substitution - coding silent	COSM4002746	115	6.48618	NA	Benign	0.533123	0.533667	0.532168	0.338234	0.533667	1	0	0	0	0	0
PBRM1	c.2128C>T	p.R710X	52609752	Substitution - Nonsense	COSM480366	30	1.69205	NA	Pathogenic​	NA	NA	NA	NA	NA	0	0	0	0	0	0
PIK3CA	c.3140A>G	p.H1047R	179234297	Substitution - Missense	COSM775	3162	26.0054	Pathogenic​	Pathogenic​	NA	NA	NA	NA	NA	0	124	1	1	1	1
PIK3CA	c.1633G>A	p.E545K	179218303	Substitution - Missense	COSM763	2520	20.7254	Pathogenic/Likely pathogenic	Pathogenic​	NA	NA	NA	NA	NA	0	110	126	1	1	1
PIK3CA	c.1624G>A	p.E542K	179218294	Substitution - Missense	COSM760	1552	12.7642	Pathogenic​	Likely pathogenic​	NA	NA	NA	NA	NA	0	102	6	1	1	1
PIK3CA	c.3140A>T	p.H1047L	179234297	Substitution - Missense	COSM776	471	3.87367	Pathogenic	Pathogenic	NA	NA	NA	NA	NA	0	21	1	1	1	1
PIK3CA	c.1636C>A	p.Q546K	179218306	Substitution - Missense	COSM766	222	1.82581	Conflicting interpretations of pathogenicity​ Pathogenic(2); Uncertain significance(1)	Likely pathogenic​	NA	NA	NA	NA	NA	0	7	3	1	1	1
PIK3CA	c.263G>A	p.R88Q	179199088	Substitution - Missense	COSM746	213	1.75179	Pathogenic​	Likely pathogenic​	NA	NA	NA	NA	NA	0	1	0	1	1	1
PIK3CA	c.1035T>A	p.N345K	179203765	Substitution - Missense	COSM754	204	1.67777	Pathogenic​	Likely pathogenic​	NA	NA	NA	NA	NA	0	29	0	1	1	1
PIK3CA	c.1634A>G	p.E545G	179218304	Substitution - Missense	COSM764	171	1.40637	Pathogenic/Likely pathogenic​	Likely pathogenic​	NA	NA	NA	NA	NA	0	10	0	1	1	1
PIK3CA	c.1258T>C	p.C420R	179210192	Substitution - Missense	COSM757	157	1.29122	Pathogenic	Uncertain significance​	NA	NA	NA	NA	NA	0	25	0	1	1	1
PIK3CA	c.2176G>A	p.E726K	179221146	Substitution - Missense	COSM87306	104	0.855333	Pathogenic	Likely pathogenic​	NA	NA	NA	NA	NA	0	2	0	1	1	1
PIK3CA	c.1637A>G	p.Q546R	179218307	Substitution - Missense	COSM12459	96	0.789539	Pathogenic	Likely pathogenic​	NA	NA	NA	NA	NA	0	1	0	1	1	1
PIK3CA	c.3139C>T	p.H1047Y	179234296	Substitution - Missense	COSM774	95	0.781314	Pathogenic​	Likely pathogenic​	NA	NA	NA	NA	NA	0	1	0	1	1	1
PIK3CA	c.241G>A	p.E81K	179199066	Substitution - Missense	COSM27502	78	0.6415	Pathogenic​	Likely pathogenic​	NA	NA	NA	NA	NA	0	1	0	1	1	1
PIK3CA	c.3145G>C	p.G1049R	179234302	Substitution - Missense	COSM12597	76	0.625051	Likely pathogenic​	Likely pathogenic​	NA	NA	NA	NA	NA	0	0	4	0	1	1
PIK3CA	c.3129G>T	p.M1043I	179234286	Substitution - Missense	COSM773	74	0.608603	Pathogenic​	Likely pathogenic​	NA	NA	NA	NA	NA	0	6	0	1	1	1
PIK3CA	c.353G>A	p.G118D	179199690	Substitution - Missense	COSM751	73	0.600378	Pathogenic​	Likely pathogenic​	NA	NA	NA	NA	NA	0	1	0	1	1	1
PIK3CA	c.1357G>A	p.E453K	179210291	Substitution - Missense	COSM12584	63	0.518135	Pathogenic​	Likely pathogenic​	NA	NA	NA	NA	NA	0	9	0	1	1	1
PIK3CA	c.1633G>C	p.E545Q	179218303	Substitution - Missense	COSM27133	61	0.501686	Pathogenic/Likely pathogenic; drug response​	Likely pathogenic​	NA	NA	NA	NA	NA	0	18	0	1	1	1
PIK3CA	c.3127A>G	p.M1043V	179234284	Substitution - Missense	COSM12591	58	0.477013	Likely pathogenic​	Likely pathogenic​	NA	NA	NA	NA	NA	0	0	0	0	0	0
PIK3CA	c.323G>A	p.R108H	179199148	Substitution - Missense	COSM27497	58	0.477013	Conflicting interpretations of pathogenicity​ Pathogenic(2); Likely pathogenic(3); Uncertain significance(1)	Likely pathogenic​	NA	NA	NA	7e-06	7e-06	0	0	0	0	0	0
PIK3CA	c.3062A>G	p.Y1021C	179234219	Substitution - Missense	COSM12461	54	0.444115	Pathogenic​	Likely pathogenic​	NA	NA	NA	NA	NA	0	26	0	1	1	1
PIK3CA	c.277C>T	p.R93W	179199102	Substitution - Missense	COSM27493	47	0.386545	Pathogenic/Likely pathogenic	Uncertain significance​	NA	NA	NA	NA	NA	0	16	0	1	1	1
PIK3CA	c.331A>G	p.K111E	179199156	Substitution - Missense	COSM13570	46	0.378321	Pathogenic​	Likely pathogenic​	NA	NA	NA	NA	NA	0	4	0	1	1	1
PIK3CA	c.3129G>A	p.M1043I	179234286	Substitution - Missense	COSM29313	46	0.378321	Pathogenic/Likely pathogenic	Likely pathogenic​	NA	NA	NA	NA	NA	0	0	0	0	0	0
PIK3CA	c.3073A>G	p.T1025A	179234230	Substitution - Missense	COSM771	40	0.328974	Pathogenic/Likely pathogenic​	Likely pathogenic​	NA	NA	NA	NA	NA	0	5	0	1	1	1
PIK3CA	c.1637A>C	p.Q546P	179218307	Substitution - Missense	COSM767	39	0.32075	Pathogenic/Likely pathogenic	Likely pathogenic​	NA	NA	NA	NA	NA	0	0	0	0	0	0
PIK3CA	c.113G>A	p.R38H	179198938	Substitution - Missense	COSM745	32	0.26318	Likely pathogenic​	Likely pathogenic​	NA	NA	NA	NA	NA	0	1	2	1	1	1
PIK3CA	c.317G>T	p.G106V	179199142	Substitution - Missense	COSM748	32	0.26318	Conflicting interpretations of pathogenicity​ Pathogenic(1); Uncertain significance(1)	Likely pathogenic​	NA	NA	NA	NA	NA	0	0	0	0	0	0
PIK3CA	c.1616C>G	p.P539R	179218286	Substitution - Missense	COSM759	31	0.254955	Likely pathogenic	Likely pathogenic​	NA	NA	NA	NA	NA	0	0	0	0	0	0
PIK3CA	c.1030G>A	p.V344M	179203760	Substitution - Missense	COSM253279	29	0.238506	Pathogenic​	Likely pathogenic​	NA	NA	NA	NA	NA	0	1	0	1	1	1
PIK3CA	c.278G>A	p.R93Q	179199103	Substitution - Missense	COSM86041	29	0.238506	Pathogenic​	Likely pathogenic​	NA	NA	NA	NA	NA	0	0	0	0	0	0
PIK3CA	c.3145G>A	p.G1049S	179234302	Substitution - Missense	COSM777	28	0.230282	Pathogenic	Likely pathogenic​	NA	NA	NA	NA	NA	0	0	0	0	0	0
PIK3CA	c.1031T>G	p.V344G	179203761	Substitution - Missense	COSM22540	26	0.213833	Likely pathogenic​	Likely pathogenic​	NA	NA	NA	NA	NA	0	0	0	0	0	0
PIK3CA	c.3132T>A	p.N1044K	179234289	Substitution - Missense	COSM12592	26	0.213833	Uncertain significance	Uncertain significance	NA	NA	NA	NA	NA	0	0	0	0	0	0
PIK3CA	c.1093G>A	p.E365K	179204536	Substitution - Missense	COSM86044	25	0.205609	Pathogenic​	Uncertain significance​	NA	NA	NA	NA	NA	0	0	0	0	0	0
PIK3CA	c.112C>T	p.R38C	179198937	Substitution - Missense	COSM744	25	0.205609	Uncertain significance​	Likely pathogenic​	NA	NA	NA	NA	NA	0	0	0	0	0	0
PIK3CA	c.1635G>T	p.E545D	179218305	Substitution - Missense	COSM765	23	0.18916	Pathogenic/Likely pathogenic​	Likely pathogenic​	NA	NA	NA	NA	NA	0	0	0	0	0	0
PIK3CA	c.1624G>C	p.E542Q	179218294	Substitution - Missense	COSM17442	21	0.172712	Pathogenic/Likely pathogenic	Likely pathogenic​	NA	NA	NA	NA	NA	0	1	0	1	1	1
PIK3CA	c.1638G>T	p.Q546H	179218308	Substitution - Missense	COSM24712	21	0.172712	Likely pathogenic​	Likely pathogenic​	NA	NA	NA	NA	NA	0	0	0	0	0	0
PIK3CA	c.1173A>G	p.I391M	179209622	Substitution - Missense	COSM328028	20	0.164487	Benign​	Benign​	NA	NA	NA	0.100492	0.100492	1	0	0	0	0	0
PIK3CA	c.1252G>A	p.E418K	179210186	Substitution - Missense	COSM12582	20	0.164487	Uncertain significance​	Uncertain significance​	NA	NA	NA	NA	NA	0	0	0	0	0	0
PIK3CA	c.1636C>G	p.Q546E	179218306	Substitution - Missense	COSM6147	20	0.164487	Pathogenic/Likely pathogenic​	Likely pathogenic​	NA	NA	NA	NA	NA	0	0	0	0	0	0
PIK3CA	c.2702G>T	p.C901F	179230039	Substitution - Missense	COSM769	19	0.156263	Likely pathogenic	Likely pathogenic​	NA	NA	NA	NA	NA	0	0	0	0	0	0
PIK3CA	c.1635G>C	p.E545D	179218305	Substitution - Missense	COSM27374	18	0.148038	Likely pathogenic	Likely pathogenic​	NA	NA	NA	NA	NA	0	0	0	0	0	0
PIK3CA	c.3019G>C	p.G1007R	179234176	Substitution - Missense	COSM17443	18	0.148038	NA	Likely pathogenic​	NA	NA	NA	NA	NA	0	0	0	0	0	0
PIK3CA	c.333G>T	p.K111N	179199158	Substitution - Missense	COSM27505	18	0.148038	NA	Pathogenic​	NA	NA	NA	NA	NA	0	0	0	0	0	0
PIK3CA	c.311C>T	p.P104L	179199136	Substitution - Missense	COSM163485	17	0.139814	Pathogenic/Likely pathogenic	Likely pathogenic​	NA	NA	NA	NA	NA	0	1	0	1	1	1
PIK3CA	c.1357G>C	p.E453Q	179210291	Substitution - Missense	COSM758	17	0.139814	Likely pathogenic​	Likely pathogenic​	NA	NA	NA	NA	NA	0	0	0	0	0	0
PIK3CA	c.1625A>T	p.E542V	179218295	Substitution - Missense	COSM762	17	0.139814	Likely pathogenic​	Likely pathogenic​	NA	NA	NA	NA	NA	0	0	0	0	0	0
PIK3CA	c.2908G>A	p.E970K	179230348	Substitution - Missense	COSM94980	14	0.115141	Pathogenic/Likely pathogenic​	Uncertain significance​	NA	NA	NA	NA	NA	0	0	0	0	0	0
PIK3CA	c.3132T>G	p.N1044K	179234289	Substitution - Missense	COSM27504	14	0.115141	NA	Uncertain significance​	NA	NA	NA	NA	NA	0	0	0	0	0	0
PIK3CA	c.316G>C	p.G106R	179199141	Substitution - Missense	COSM86046	13	0.106917	Likely pathogenic​	Likely pathogenic​	NA	NA	NA	NA	NA	0	1	0	1	1	1
PIK3CA	c.1034A>T	p.N345I	179203764	Substitution - Missense	COSM94978	13	0.106917	Likely pathogenic	Likely pathogenic	NA	NA	NA	NA	NA	0	0	0	0	0	0
PIK3CA	c.1639G>A	p.E547K	179218309	Substitution - Missense	COSM29315	13	0.106917	NA	Uncertain significance​	NA	NA	NA	NA	NA	0	0	0	0	0	0
PIK3CA	c.3129G>C	p.M1043I	179234286	Substitution - Missense	COSM94984	13	0.106917	NA	Likely pathogenic​	NA	NA	NA	NA	NA	0	0	0	0	0	0
PIK3CB	c.3151G>A	p.E1051K	138655451	Substitution - Missense	COSM317875	19	2.78184	NA	Uncertain significance	NA	NA	NA	NA	NA	0	0	0	0	0	0
PIK3CB	c.3200A>T	p.D1067V	138655402	Substitution - Missense	COSM228367	16	2.34261	NA	Uncertain significance	NA	NA	NA	NA	NA	0	0	0	0	0	0
PIK3CB	c.962G>A	p.R321Q	138734644	Substitution - Missense	COSM1039061	14	2.04978	NA	Uncertain significance	7.4e-05	7.7e-05	3.5e-05	NA	7.7e-05	0	0	0	0	0	0
PIK3CB	c.1408G>A	p.E470K	138707281	Substitution - Missense	COSM1039059	11	1.61054	NA	Uncertain significance	NA	NA	NA	NA	NA	0	0	0	0	1	0
PIK3CB	c.1654G>A	p.E552K	138699023	Substitution - Missense	COSM1039056	7	1.02489	NA	Uncertain significance	NA	NA	NA	NA	NA	0	0	0	0	0	0
PIK3CD	c.1558T>G	p.S520A	9720778	Substitution - Missense	COSM3746196	21	2.9661	NA	Uncertain significance	0.000553	0.000723	0.00216	0.000187	0.00216	0	0	0	0	0	0
PIK3CD	c.3061G>A	p.E1021K	9726972	Substitution - Missense	COSM1581454	17	2.40113	Pathogenic​	Likely pathogenic​	NA	NA	NA	NA	NA	0	0	0	0	0	0
PIK3CD	c.2503G>A	p.A835T	9723201	Substitution - Missense	COSM180413	8	1.12994	Uncertain significance​	Uncertain significance	NA	NA	NA	NA	NA	0	0	0	0	0	0
PIK3CD	c.113G>A	p.R38H	9710568	Substitution - Missense	COSM1220603	7	0.988701	NA	Uncertain significance	NA	NA	NA	7e-06	7e-06	0	0	0	0	0	0
PIK3CD	c.262C>T	p.R88C	9715661	Substitution - Missense	COSM1220601	6	0.847458	Uncertain significance	Uncertain significance	NA	NA	NA	7e-06	7e-06	0	0	0	0	0	0
PIK3CG	c.2569A>G	p.T857A	106882147	Substitution - Missense	COSM3762311	42	2.4735	NA	Benign	0.026905	0.027091	0.027744	0.053758	0.053758	1	0	0	0	0	0
PIK3CG	c.1565A>G	p.N522S	106869126	Substitution - Missense	COSM5020760	27	1.59011	Benign	Uncertain significance	NA	NA	NA	0.012263	0.012263	1	0	0	0	0	0
PIK3CG	c.1325C>A	p.S442Y	106868886	Substitution - Missense	COSM3762310	16	0.942285	Benign	Benign	0.182157	0.181718	0.184585	0.085567	0.184585	1	0	0	0	0	0
PIK3CG	c.493G>A	p.V165I	106868054	Substitution - Missense	COSM598228	12	0.706714	NA	Uncertain significance	NA	NA	NA	NA	NA	0	0	0	0	0	0
PIK3CG	c.2275G>A	p.V759I	106872926	Substitution - Missense	COSM598222	11	0.647821	NA	Uncertain significance	9e-06	1.3e-05	NA	1.3e-05	1.3e-05	0	0	0	0	0	0
PIK3CG	c.799G>A	p.E267K	106868360	Substitution - Missense	COSM3631736	10	0.588928	NA	Uncertain significance	NA	NA	NA	NA	NA	0	0	0	0	0	0
PIK3R1	c.1690A>G	p.N564D	68295269	Substitution - Missense	COSM42912	48	5.19481	Pathogenic/Likely pathogenic​	Uncertain significance	NA	NA	NA	NA	NA	0	1	0	1	1	1
PIK3R1	c.978G>A	p.M326I	68292320	Substitution - Missense	COSM3727824	44	4.7619	Benign/Likely benign	Benign	0.148899	0.146719	0.149692	0.218746	0.218746	1	7	0	1	1	1
PIK3R1	c.1042C>T	p.R348X	68293123	Substitution - Nonsense	COSM85926	38	4.11255	Pathogenic	Pathogenic​	NA	NA	NA	NA	NA	0	0	0	0	0	0
PIK3R1	c.1699A>G	p.K567E	68295278	Substitution - Missense	COSM1069611	33	3.57143	Likely pathogenic​	Uncertain significance	NA	NA	NA	NA	NA	0	14	0	1	1	1
PIK3R1	c.1126G>A	p.G376R	68293310	Substitution - Missense	COSM35827	30	3.24675	Pathogenic/Likely pathogenic​	Likely pathogenic​	NA	NA	NA	NA	NA	0	0	0	0	0	0
PIK3R1	c.1381C>T	p.R461X	68293790	Substitution - Nonsense	COSM43181	12	1.2987	Pathogenic/Likely pathogenic	Pathogenic​	NA	NA	NA	NA	NA	0	0	0	0	0	0
PIK3R1	c.1924C>T	p.R642X	68296280	Substitution - Nonsense	COSM85931	10	1.08225	NA	Pathogenic​	NA	NA	NA	NA	NA	0	0	0	0	0	0
PIK3R1	c.1072C>T	p.R358X	68293153	Substitution - Nonsense	COSM87220	9	0.974026	Pathogenic​	Pathogenic​	NA	NA	NA	NA	NA	0	0	0	0	0	0
PIK3R2	c.937T>C	p.S313P	18162237	Substitution - Missense	COSM9501501	86	15.8379	Benign	Benign	0.957644	0.957389	0.956119	0.955297	0.957644	1	0	0	0	0	0
PIK3R2	c.1117G>A	p.G373R	18162974	Substitution - Missense	COSM993028	24	4.41989	Pathogenic	Likely pathogenic​	NA	NA	NA	NA	NA	0	0	0	0	0	0
PIK3R2	c.1669G>T	p.D557Y	18167239	Substitution - Missense	COSM4393570	10	1.84162	Pathogenic​	Likely pathogenic​	NA	NA	NA	NA	NA	0	0	0	0	0	0
PMS2	c.1866G>A	p.M622I	5986899	Substitution - Missense	COSM3762794	23	3.37739	Benign	Benign	NA	NA	NA	0.015836	0.015836	1	0	0	0	0	0
PMS2	c.1531A>G	p.T511A	5987234	Substitution - Missense	COSM9494483	19	2.79001	Benign​	Benign​	NA	NA	NA	0.021476	0.021476	1	0	0	0	0	0
PMS2	c.1789A>T	p.T597S	5986976	Substitution - Missense	COSM9494490	17	2.49633	Benign	Benign	NA	NA	NA	0.008896	0.008896	0	0	0	0	0	0
PMS2	c.2570G>C	p.G857A	5973418	Substitution - Missense	COSM3833052	15	2.20264	Benign​	Benign	0.277374	0.276068	0.288545	0.31028	0.31028	1	0	0	0	0	0
POLE	c.857C>G	p.P286R	132676598	Substitution - Missense	COSM937332	123	6.20585	Uncertain significance​	Uncertain significance	NA	NA	NA	NA	NA	0	0	0	0	1	0
POLE	c.1231G>T	p.V411L	132673703	Substitution - Missense	COSM204094	36	1.81635	Uncertain significance	Uncertain significance	NA	NA	NA	NA	NA	0	0	0	0	0	0
POLE	c.1231G>C	p.V411L	132673703	Substitution - Missense	COSM4716439	25	1.26135	Uncertain significance​	Likely pathogenic​	NA	NA	NA	NA	NA	0	1	2	1	1	1
PPP2R1A	c.547C>T	p.R183W	52212729	Substitution - Missense	COSM51211	84	9.98811	Pathogenic/Likely pathogenic	Likely pathogenic	NA	NA	NA	NA	NA	0	0	0	0	1	0
PPP2R1A	c.536C>G	p.P179R	52212718	Substitution - Missense	COSM86034	83	9.8692	Likely pathogenic	Likely pathogenic	NA	NA	NA	NA	NA	0	0	0	0	1	0
PPP2R1A	c.767C>T	p.S256F	52213070	Substitution - Missense	COSM86039	38	4.51843	NA	Uncertain significance	NA	NA	NA	NA	NA	0	0	0	0	1	0
PPP2R1A	c.548G>A	p.R183Q	52212730	Substitution - Missense	COSM51253	37	4.39952	Conflicting interpretations of pathogenicity​ Pathogenic(2); Likely pathogenic(1); Uncertain significance(1)	Likely pathogenic	NA	NA	NA	NA	NA	0	1	0	1	1	1
PPP2R1A	c.544C>T	p.R182W	52212726	Substitution - Missense	COSM51212	21	2.49703	Pathogenic/Likely pathogenic​	Likely pathogenic	NA	NA	NA	NA	NA	0	0	0	0	0	0
PTEN	c.389G>A	p.R130Q	87933148	Substitution - Missense	COSM5033	219	5.20314	Pathogenic	Likely pathogenic	NA	NA	NA	NA	NA	0	0	0	0	0	0
PTEN	c.388C>G	p.R130G	87933147	Substitution - Missense	COSM5219	210	4.98931	Pathogenic	Likely pathogenic	NA	NA	NA	NA	NA	0	0	0	0	0	0
PTEN	c.955_958del	p.T319X	87961047..87961050	Deletion - Frameshift	COSM4894	186	4.4191	Pathogenic​	NA	NA	NA	NA	NA	NA	0	0	0	0	0	0
PTEN	c.697C>T	p.R233X	87957915	Substitution - Nonsense	COSM5154	177	4.20527	NA	Pathogenic	NA	NA	NA	NA	NA	0	0	0	0	0	0
PTEN	c.388C>T	p.R130X	87933147	Substitution - Nonsense	COSM5152	151	3.58755	Pathogenic	Pathogenic	NA	NA	NA	NA	NA	0	0	0	0	0	0
PTEN	c.800del	p.K267RfsX9	87958018	Deletion - Frameshift	COSM5809	123	2.92231	Pathogenic​	NA	NA	NA	NA	NA	NA	0	0	0	0	0	0
PTEN	c.968del	p.N323MfsX21	87961060	Deletion - Frameshift	COSM5801	75	1.7819	Pathogenic	NA	NA	NA	NA	NA	NA	0	0	0	0	0	0
PTEN	c.517C>T	p.R173C	87952142	Substitution - Missense	COSM5089	65	1.54431	NA	Likely pathogenic	NA	NA	NA	7e-06	7e-06	0	0	0	0	0	0
PTEN	c.518G>A	p.R173H	87952143	Substitution - Missense	COSM5039	63	1.49679	Pathogenic/Likely pathogenic	Likely pathogenic	NA	NA	NA	NA	NA	0	0	0	0	0	0
PTEN	c.1003C>T	p.R335X	87961095	Substitution - Nonsense	COSM5151	46	1.0929	NA	Pathogenic	NA	NA	NA	NA	NA	0	0	0	0	0	0
PTEN	c.511C>T	p.Q171X	87952136	Substitution - Nonsense	COSM5149	40	0.950344	NA	Pathogenic	NA	NA	NA	NA	NA	0	0	0	0	0	0
PTEN	c.733C>T	p.Q245X	87957951	Substitution - Nonsense	COSM5159	39	0.926586	Pathogenic​	Pathogenic	NA	NA	NA	NA	NA	0	0	0	0	0	0
PTEN	c.19G>T	p.E7X	87864488	Substitution - Nonsense	COSM5298	34	0.807793	Likely pathogenic​	Pathogenic	NA	NA	NA	NA	NA	0	0	0	0	0	0
PTEN	c.389G>T	p.R130L	87933148	Substitution - Missense	COSM5216	28	0.665241	Pathogenic/Likely pathogenic	Likely pathogenic	NA	NA	NA	NA	NA	0	0	0	0	0	0
PTEN	c.640C>T	p.Q214X	87957858	Substitution - Nonsense	COSM5150	28	0.665241	Pathogenic​	Pathogenic	NA	NA	NA	NA	NA	0	0	0	0	0	0
PTEN	c.406T>C	p.C136R	87933165	Substitution - Missense	COSM5096	27	0.641483	NA	Likely pathogenic	NA	NA	NA	NA	NA	0	0	0	0	0	0
PTEN	c.49C>T	p.Q17X	87864518	Substitution - Nonsense	COSM5153	25	0.593965	NA	Pathogenic	NA	NA	NA	NA	NA	0	0	0	0	0	0
PTEN	c.892C>T	p.Q298X	87960984	Substitution - Nonsense	COSM5156	25	0.593965	Pathogenic	Pathogenic	NA	NA	NA	NA	NA	0	0	0	0	0	0
PTEN	c.278A>G	p.H93R	87933037	Substitution - Missense	COSM5060	24	0.570207	Pathogenic	Likely pathogenic	NA	NA	NA	NA	NA	0	0	0	0	0	0
PTEN	c.395G>A	p.G132D	87933154	Substitution - Missense	COSM5123	23	0.546448	NA	Likely pathogenic	NA	NA	NA	NA	NA	0	0	0	0	0	0
PTEN	c.895G>T	p.E299X	87960987	Substitution - Nonsense	COSM5312	23	0.546448	NA	Pathogenic	NA	NA	NA	NA	NA	0	0	0	0	0	0
PTEN	c.202T>C	p.Y68H	87925550	Substitution - Missense	COSM5036	21	0.498931	Pathogenic/Likely pathogenic​	Likely pathogenic	9e-06	NA	NA	NA	9e-06	0	0	0	0	0	0
PTEN	c.112C>T	p.P38S	87894057	Substitution - Missense	COSM5142	18	0.427655	Uncertain significance	Uncertain significance	NA	NA	NA	NA	NA	0	0	0	0	0	0
PTEN	c.376G>A	p.A126T	87933135	Substitution - Missense	COSM5051	18	0.427655	Likely pathogenic​	Uncertain significance	NA	NA	NA	NA	NA	0	0	0	0	0	0
PTEN	c.424C>T	p.R142W	87933183	Substitution - Missense	COSM5122	18	0.427655	NA	Uncertain significance	NA	NA	NA	NA	NA	0	0	0	0	0	0
PTEN	c.182A>G	p.H61R	87925530	Substitution - Missense	COSM5042	17	0.403896	NA	Uncertain significance​	NA	NA	NA	NA	NA	0	0	0	0	0	0
PTEN	c.385G>A	p.G129R	87933144	Substitution - Missense	COSM5092	17	0.403896	NA	Likely pathogenic	NA	NA	NA	NA	NA	0	0	0	0	0	0
PTEN	c.389G>C	p.R130P	87933148	Substitution - Missense	COSM5277	17	0.403896	Pathogenic	Likely pathogenic	NA	NA	NA	NA	NA	0	0	0	0	0	0
PTEN	c.686C>G	p.S229X	87957904	Substitution - Nonsense	COSM5295	17	0.403896	Pathogenic	Pathogenic	NA	NA	NA	NA	NA	0	0	0	0	0	0
PTEN	c.834C>G	p.F278L	87960926	Substitution - Missense	COSM6503484	17	0.403896	NA	Uncertain significance	NA	NA	NA	NA	NA	0	0	0	0	0	0
PTEN	c.407G>A	p.C136Y	87933166	Substitution - Missense	COSM12734	16	0.380138	NA	Likely pathogenic	NA	NA	NA	NA	NA	0	0	0	0	0	0
PTEN	c.493G>A	p.G165R	87952118	Substitution - Missense	COSM5091	16	0.380138	Pathogenic	Likely pathogenic	NA	NA	NA	NA	NA	0	0	0	0	0	0
PTEN	c.737C>T	p.P246L	87957955	Substitution - Missense	COSM5111	16	0.380138	Pathogenic	Likely pathogenic	NA	NA	NA	NA	NA	0	0	0	0	0	0
PTEN	c.302T>C	p.I101T	87933061	Substitution - Missense	COSM5109	15	0.356379	Pathogenic/Likely pathogenic​	Likely pathogenic	NA	NA	NA	NA	NA	0	0	0	0	0	0
PTEN	c.464A>G	p.Y155C	87933223	Substitution - Missense	COSM5144	15	0.356379	NA	Likely pathogenic	9e-06	1.3e-05	NA	NA	1.3e-05	0	0	0	0	0	0
PTEN	c.276C>A	p.D92E	87933035	Substitution - Missense	COSM35759	14	0.332621	NA	Uncertain significance​	NA	NA	NA	NA	NA	0	0	0	0	0	0
PTEN	c.386G>A	p.G129E	87933145	Substitution - Missense	COSM28917	14	0.332621	NA	Likely pathogenic	NA	NA	NA	NA	NA	0	0	0	0	0	0
PTEN	c.1021T>G	p.F341V	87961113	Substitution - Missense	COSM5255	13	0.308862	Uncertain significance​	Uncertain significance​	NA	NA	NA	NA	NA	0	0	0	0	0	0
PTEN	c.103A>G	p.M35V	87894048	Substitution - Missense	COSM5053	13	0.308862	NA	Likely pathogenic	NA	NA	NA	NA	NA	0	0	0	0	0	0
PTEN	c.106G>A	p.G36R	87894051	Substitution - Missense	COSM5135	13	0.308862	Conflicting interpretations of pathogenicity Pathogenic(1); Likely pathogenic(2); Uncertain significance(1)	Likely pathogenic	NA	NA	NA	NA	NA	0	0	0	0	0	0
PTEN	c.367C>T	p.H123Y	87933126	Substitution - Missense	COSM5078	13	0.308862	Pathogenic/Likely pathogenic	Likely pathogenic	NA	NA	NA	NA	NA	0	0	0	0	0	0
PTEN	c.370T>A	p.C124S	87933129	Substitution - Missense	COSM5224	13	0.308862	Likely pathogenic​	Likely pathogenic	NA	NA	NA	NA	NA	0	0	0	0	0	0
PTEN	c.380G>A	p.G127E	87933139	Substitution - Missense	COSM5143	13	0.308862	Likely pathogenic	Likely pathogenic	NA	NA	NA	NA	NA	0	0	0	0	0	0
PTEN	c.376G>T	p.A126S	87933135	Substitution - Missense	COSM28889	12	0.285103	Uncertain significance	Uncertain significance	NA	NA	NA	NA	NA	0	0	0	0	0	0
PTEN	c.380G>T	p.G127V	87933139	Substitution - Missense	COSM5285	12	0.285103	Uncertain significance​	Likely pathogenic​	NA	NA	NA	NA	NA	0	0	0	0	0	0
PTEN	c.445C>T	p.Q149X	87933204	Substitution - Nonsense	COSM5164	12	0.285103	Pathogenic	Pathogenic	NA	NA	NA	NA	NA	0	0	0	0	0	0
PTEN	c.477G>T	p.R159S	87933236	Substitution - Missense	COSM5287	12	0.285103	Likely pathogenic​	Likely pathogenic​	NA	NA	NA	NA	NA	0	0	0	0	0	0
PTEN	c.494G>A	p.G165E	87952119	Substitution - Missense	COSM5114	12	0.285103	Conflicting interpretations of pathogenicity​ Pathogenic(1); Uncertain significance(1)	Uncertain significance​	NA	NA	NA	NA	NA	0	0	0	0	0	0
PTPN11	c.226G>A	p.E76K	112450406	Substitution - Missense	COSM13000	124	8.76945	Conflicting interpretations of pathogenicity​ Pathogenic(4); Uncertain significance(1)	Likely pathogenic	NA	NA	NA	NA	NA	0	2	0	1	1	1
PTPN11	c.215C>T	p.A72V	112450395	Substitution - Missense	COSM13015	82	5.79915	Conflicting interpretations of pathogenicity​ Pathogenic(1); Uncertain significance(1)	Likely pathogenic	NA	NA	NA	NA	NA	0	28	2	1	1	1
PTPN11	c.214G>A	p.A72T	112450394	Substitution - Missense	COSM13014	55	3.88967	Pathogenic/Likely pathogenic	Likely pathogenic	NA	NA	NA	NA	NA	0	0	0	0	0	0
PTPN11	c.181G>T	p.D61Y	112450361	Substitution - Missense	COSM13011	53	3.74823	Pathogenic​	Likely pathogenic	NA	NA	NA	NA	NA	0	0	0	0	1	0
PTPN11	c.182A>T	p.D61V	112450362	Substitution - Missense	COSM13022	50	3.53607	Pathogenic	Likely pathogenic	NA	NA	NA	NA	NA	0	0	0	0	0	0
PTPN11	c.179G>T	p.G60V	112450359	Substitution - Missense	COSM13028	47	3.3239	Pathogenic/Likely pathogenic	Likely pathogenic	NA	NA	NA	NA	NA	0	0	0	0	0	0
PTPN11	c.205G>A	p.E69K	112450385	Substitution - Missense	COSM13013	47	3.3239	Conflicting interpretations of pathogenicity​ Likely pathogenic(2); Uncertain significance(1)	Likely pathogenic	NA	NA	NA	NA	NA	0	0	0	0	0	0
RAC1	c.85C>T	p.P29S	6387261	Substitution - Missense	COSM125734	138	41.0714	Likely pathogenic	Likely pathogenic	NA	NA	NA	NA	NA	0	0	0	0	1	0
RAC1	c.533C>T	p.A178V	6402343	Substitution - Missense	COSM389868	21	6.25	Uncertain significance​	Likely pathogenic	NA	NA	NA	NA	NA	0	0	0	0	1	0
RAC1	c.86C>T	p.P29L	6387262	Substitution - Missense	COSM3640035	9	2.67857	Likely pathogenic​	Likely pathogenic	NA	NA	NA	NA	NA	0	0	0	0	0	0
RAF1	c.770C>T	p.S257L	12604200	Substitution - Missense	COSM181063	35	7.77778	Pathogenic	Likely pathogenic	NA	NA	NA	NA	NA	0	0	0	0	1	0
RAF1	c.776C>T	p.S259F	12604194	Substitution - Missense	COSM1536534	10	2.22222	Pathogenic	Likely pathogenic	NA	NA	NA	NA	NA	0	0	0	0	0	0
RB1	c.1735C>T	p.R579X	48453032	Substitution - Nonsense	COSM892	27	1.73633	Pathogenic	Pathogenic	9e-06	NA	NA	NA	9e-06	0	1	0	1	1	1
RB1	c.751C>T	p.R251X	48362847	Substitution - Nonsense	COSM878	27	1.73633	Pathogenic	Pathogenic	NA	NA	NA	NA	NA	0	0	0	0	0	0
RB1	c.958C>T	p.R320X	48367512	Substitution - Nonsense	COSM891	26	1.67203	Pathogenic	Pathogenic	NA	NA	NA	NA	NA	0	0	0	0	0	0
RB1	c.1363C>T	p.R455X	48379624	Substitution - Nonsense	COSM895	21	1.35048	Pathogenic	Pathogenic	NA	NA	NA	7e-06	7e-06	0	0	0	0	0	0
RB1	c.1654C>T	p.R552X	48381402	Substitution - Nonsense	COSM887	21	1.35048	Pathogenic	Pathogenic	NA	NA	NA	NA	NA	0	0	0	0	0	0
RB1	c.1666C>T	p.R556X	48381414	Substitution - Nonsense	COSM888	21	1.35048	Pathogenic	Pathogenic	NA	NA	NA	NA	NA	0	0	0	0	0	0
RB1	c.1072C>T	p.R358X	48368549	Substitution - Nonsense	COSM879	20	1.28617	Pathogenic​	Pathogenic	NA	NA	NA	NA	NA	0	0	0	0	0	0
RB1	c.2359C>T	p.R787X	48465238	Substitution - Nonsense	COSM23824	20	1.28617	Conflicting interpretations of pathogenicity​ Pathogenic(4); Uncertain significance(1)	Pathogenic	NA	NA	NA	NA	NA	0	0	0	0	0	0
RB1	c.1333C>T	p.R445X	48379594	Substitution - Nonsense	COSM880	16	1.02894	Pathogenic	Pathogenic	NA	NA	NA	NA	NA	0	0	0	0	0	0
RET	c.2753T>C	p.M918T	43121968	Substitution - Missense	COSM965	478	23.5816	NA	Uncertain significance​	NA	NA	NA	NA	NA	0	0	0	0	1	0
RET	c.135A>G	p.A45=	43100520	Substitution - coding silent	COSM4144677	42	2.07203	Benign	Benign	0.580144	0.580135	0.577571	0.785022	0.785022	1	0	0	0	0	0
RET	c.2307G>T	p.L769=	43118395	Substitution - coding silent	COSM4418405	29	1.43069	NA	Benign	0.449993	0.451345	0.448829	0.784632	0.784632	1	0	0	0	0	0
RHOA	c.50G>T	p.G17V	49375540	Substitution - Missense	COSM78415	253	32.8999	NA	Likely pathogenic​	NA	NA	NA	NA	NA	0	0	1	0	1	1
RHOA	c.50G>A	p.G17E	49375540	Substitution - Missense	COSM2849898	40	5.20156	NA	Likely pathogenic​	NA	NA	NA	NA	NA	0	0	0	0	1	0
RHOA	c.125A>G	p.Y42C	49375465	Substitution - Missense	COSM2849892	34	4.42133	NA	Likely pathogenic​	NA	NA	NA	NA	NA	0	0	0	0	0	0
RHOA	c.14G>A	p.R5Q	49375576	Substitution - Missense	COSM190569	22	2.86086	NA	Likely pathogenic​	NA	NA	NA	NA	NA	0	0	0	0	0	0
RHOA	c.46T>C	p.C16R	49375544	Substitution - Missense	COSM5415332	19	2.47074	NA	Likely pathogenic​	NA	NA	NA	NA	NA	0	0	0	0	0	0
RHOA	c.139G>A	p.E47K	49375451	Substitution - Missense	COSM6846198	16	2.08062	NA	Likely pathogenic​	NA	NA	NA	NA	NA	0	0	0	0	0	0
RHOA	c.13C>T	p.R5W	49375577	Substitution - Missense	COSM446704	15	1.95059	NA	Likely pathogenic​	NA	NA	NA	NA	NA	0	0	0	0	0	0
RHOA	c.185G>A	p.G62E	49368520	Substitution - Missense	COSM4118486	9	1.17035	NA	Likely pathogenic​	NA	NA	NA	NA	NA	0	0	0	0	0	0
RHOA	c.482C>T	p.A161V	49360309	Substitution - Missense	COSM1753277	9	1.17035	NA	Uncertain significance​	NA	NA	NA	NA	NA	0	0	0	0	0	0
RNF43	c.433C>T	p.R145X	58363543	Substitution - Nonsense	COSM248786	20	2.44798	Uncertain significance​	Uncertain significance​	NA	NA	NA	NA	NA	0	0	0	0	0	0
ROS1	c.433A>C	p.T145P	117404285	Substitution - Missense	COSM4003668	51	2.05149	NA	Benign	0.094343	0.094572	0.094628	0.158262	0.158262	1	0	0	0	0	0
ROS1	c.6637G>A	p.D2213N	117301070	Substitution - Missense	COSM150170	49	1.97104	NA	Benign	0.144404	0.144687	0.147392	0.187103	0.187103	1	0	0	0	0	0
ROS1	c.6686C>G	p.S2229C	117301021	Substitution - Missense	COSM150168	48	1.93081	NA	Benign	0.144365	0.144654	0.147392	0.188533	0.188533	1	0	0	0	0	0
ROS1	c.6682A>C	p.K2228Q	117301025	Substitution - Missense	COSM150169	47	1.89059	NA	Benign	0.144367	0.144661	0.147392	0.18842	0.18842	1	0	0	0	0	0
ROS1	c.500G>A	p.R167Q	117403216	Substitution - Missense	COSM5019315	39	1.56879	NA	Benign	0.054473	0.053987	0.054215	0.062907	0.062907	1	0	0	0	0	0
RXRA	c.1280C>T	p.S427F	134436505	Substitution - Missense	COSM1314610	23	7.84983	Likely pathogenic	Likely pathogenic​	NA	NA	NA	NA	NA	0	0	0	0	1	0
RXRA	c.1280C>A	p.S427Y	134436505	Substitution - Missense	COSM1314611	6	2.04778	Likely pathogenic​	Likely pathogenic​	NA	NA	NA	NA	NA	0	0	0	0	0	0
SF3B1	c.2098A>G	p.K700E	197402110	Substitution - Missense	COSM84677	733	29.821	Likely pathogenic	Uncertain significance​	9.2e-05	7.8e-05	7.1e-05	3.9e-05	9.2e-05	0	0	0	0	1	0
SF3B1	c.1874G>A	p.R625H	197402759	Substitution - Missense	COSM255276	86	3.49878	Likely pathogenic	Uncertain significance​	NA	NA	NA	NA	NA	0	0	0	0	0	0
SF3B1	c.1873C>T	p.R625C	197402760	Substitution - Missense	COSM110696	76	3.09194	Likely pathogenic​	Uncertain significance​	NA	NA	NA	NA	NA	0	0	0	0	0	0
SF3B1	c.2225G>A	p.G742D	197401887	Substitution - Missense	COSM145923	69	2.80716	Likely pathogenic​	Uncertain significance​	NA	NA	NA	1.3e-05	1.3e-05	0	0	0	0	0	0
SF3B1	c.1998G>C	p.K666N	197402635	Substitution - Missense	COSM132937	51	2.07486	Pathogenic/Likely pathogenic	Uncertain significance​	9e-06	NA	NA	3.3e-05	3.3e-05	0	0	0	0	0	0
SF3B1	c.1997A>C	p.K666T	197402636	Substitution - Missense	COSM131556	41	1.66802	Likely pathogenic	Uncertain significance​	3.7e-05	2.6e-05	NA	7e-06	3.7e-05	0	0	0	0	0	0
SMAD2	c.1391C>G	p.S464X	47841840	Substitution - Nonsense	COSM268520	34	5.96491	NA	Uncertain significance​	NA	NA	NA	NA	NA	0	0	0	0	1	0
SMAD2	c.544C>T	p.R182X	47868434	Substitution - Nonsense	COSM988687	18	3.15789	Pathogenic​	Pathogenic​	NA	NA	NA	NA	NA	0	0	0	0	1	0
SMAD4	c.1082G>A	p.R361H	51065549	Substitution - Missense	COSM14122	171	7.90203	Pathogenic	Likely pathogenic​	NA	NA	NA	NA	NA	0	57	0	1	1	1
SMAD4	c.1081C>T	p.R361C	51065548	Substitution - Missense	COSM14140	145	6.70055	Pathogenic	Likely pathogenic​	NA	NA	NA	NA	NA	0	0	0	0	1	0
SMAD4	c.1333C>T	p.R445X	51076662	Substitution - Nonsense	COSM14096	48	2.21811	Pathogenic	Pathogenic	NA	NA	NA	NA	NA	0	0	0	0	0	0
SMAD4	c.353C>T	p.A118V	51048789	Substitution - Missense	COSM14215	40	1.84843	Uncertain significance	Uncertain significance	NA	NA	NA	NA	NA	0	0	0	0	0	0
SMAD4	c.403C>T	p.R135X	51048839	Substitution - Nonsense	COSM14168	33	1.52495	Pathogenic	Pathogenic	NA	NA	NA	NA	NA	0	0	0	0	0	0
SMAD4	c.1157G>A	p.G386D	51067036	Substitution - Missense	COSM1150895	23	1.06285	Pathogenic/Likely pathogenic	Likely pathogenic	NA	NA	NA	NA	NA	0	1	1	1	1	1
SMAD4	c.1051G>C	p.D351H	51065518	Substitution - Missense	COSM14135	23	1.06285	Likely pathogenic	Likely pathogenic	NA	NA	NA	NA	NA	0	0	0	0	0	0
SMAD4	c.1067C>T	p.P356L	51065534	Substitution - Missense	COSM14049	21	0.970425	Uncertain significance	Uncertain significance​	NA	NA	NA	NA	NA	0	0	0	0	0	0
SMAD4	c.988G>A	p.E330K	51065455	Substitution - Missense	COSM14169	21	0.970425	NA	Likely pathogenic	NA	NA	NA	NA	NA	0	0	0	0	0	0
SMAD4	c.1487G>A	p.R496H	51078295	Substitution - Missense	COSM14193	20	0.924214	Uncertain significance	Uncertain significance​	NA	NA	NA	NA	NA	0	0	0	0	0	0
SMARCA4	c.2729C>T	p.T910M	11021837	Substitution - Missense	COSM88025	43	1.7023	Uncertain significance​	Uncertain significance	NA	NA	NA	NA	NA	0	0	0	0	0	0
SMARCA4	c.3727C>T	p.R1243W	11033470	Substitution - Missense	COSM255312	21	0.831354	NA	Uncertain significance	NA	NA	NA	NA	NA	0	0	0	0	0	0
SMARCA4	c.3575G>A	p.R1192H	11033318	Substitution - Missense	COSM1266237	20	0.791766	NA	Uncertain significance	NA	NA	NA	NA	NA	0	1	0	1	1	1
SMARCA4	c.3574C>T	p.R1192C	11033317	Substitution - Missense	COSM303247	17	0.673001	Uncertain significance​	Uncertain significance	NA	NA	NA	7e-06	7e-06	0	0	0	0	0	0
SMARCA4	c.3694G>A	p.G1232S	11033437	Substitution - Missense	COSM215752	17	0.673001	NA	Uncertain significance	NA	NA	NA	NA	NA	0	0	0	0	0	0
SMARCA4	c.2461G>A	p.E821K	11018979	Substitution - Missense	COSM215749	14	0.554236	NA	Uncertain significance	NA	NA	NA	NA	NA	0	0	0	0	0	0
SMARCA4	c.3566G>A	p.R1189Q	11033309	Substitution - Missense	COSM126317	14	0.554236	NA	Uncertain significance	NA	NA	NA	NA	NA	0	0	0	0	0	0
SMARCA4	c.2653C>T	p.R885C	11021761	Substitution - Missense	COSM30577	11	0.435471	Pathogenic/Likely pathogenic	Likely pathogenic​	NA	NA	NA	NA	NA	0	0	0	0	0	0
SMARCA4	c.3469C>T	p.R1157W	11030816	Substitution - Missense	COSM84489	11	0.435471	NA	Likely pathogenic​	NA	NA	NA	NA	NA	0	0	0	0	0	0
SMARCA4	c.2738C>T	p.P913L	11021846	Substitution - Missense	COSM4408937	10	0.395883	Likely pathogenic​	Uncertain significance	NA	NA	NA	NA	NA	0	0	0	0	0	0
SMARCA4	c.2758G>A	p.E920K	11021866	Substitution - Missense	COSM990750	10	0.395883	NA	Uncertain significance	NA	NA	NA	NA	NA	0	0	0	0	0	0
SMARCA4	c.3403C>T	p.R1135W	11030750	Substitution - Missense	COSM215751	10	0.395883	NA	Uncertain significance	NA	NA	NA	NA	NA	0	0	0	0	0	0
SPOP	c.399C>G	p.F133L	49619062	Substitution - Missense	COSM95272	62	8.2777	Conflicting interpretations of pathogenicity​ Likely pathogenic(1); Uncertain significance(1)	Uncertain significance​	NA	NA	NA	NA	NA	0	0	0	0	1	0
SPOP	c.397T>G	p.F133V	49619064	Substitution - Missense	COSM219965	48	6.40854	Conflicting interpretations of pathogenicity​ Likely pathogenic(1); Uncertain significance(1)	Uncertain significance​	NA	NA	NA	NA	NA	0	0	0	0	1	0
SPOP	c.305T>G	p.F102C	49619281	Substitution - Missense	COSM220066	34	4.53939	Conflicting interpretations of pathogenicity​ Likely pathogenic(2); Uncertain significance(1)	Likely pathogenic​	NA	NA	NA	NA	NA	0	0	0	0	1	0
SPOP	c.391T>G	p.W131G	49619070	Substitution - Missense	COSM242641	25	3.33778	Likely pathogenic​	Likely pathogenic​	NA	NA	NA	NA	NA	0	0	0	0	1	0
SPOP	c.260A>G	p.Y87C	49619326	Substitution - Missense	COSM248681	22	2.93725	Likely pathogenic​	Likely pathogenic​	NA	NA	NA	NA	NA	0	0	0	0	0	0
SPOP	c.399C>A	p.F133L	49619062	Substitution - Missense	COSM247571	22	2.93725	NA	Uncertain significance​	NA	NA	NA	NA	NA	0	0	0	0	0	0
SPOP	c.304T>G	p.F102V	49619282	Substitution - Missense	COSM4393128	17	2.26969	Likely pathogenic	Likely pathogenic	NA	NA	NA	NA	NA	0	0	0	0	0	0
SPOP	c.349A>G	p.M117V	49619237	Substitution - Missense	COSM980812	15	2.00267	NA	Uncertain significance​	NA	NA	NA	NA	NA	0	0	0	0	0	0
SPOP	c.398T>C	p.F133S	49619063	Substitution - Missense	COSM247573	14	1.86916	Likely pathogenic​	Likely pathogenic​	NA	NA	NA	NA	NA	0	0	0	0	0	0
SPOP	c.232G>A	p.E78K	49619354	Substitution - Missense	COSM980815	12	1.60214	NA	Uncertain significance​	NA	NA	NA	NA	NA	0	0	0	0	0	0
SPOP	c.259T>A	p.Y87N	49619327	Substitution - Missense	COSM242640	12	1.60214	Likely pathogenic​	Likely pathogenic​	NA	NA	NA	NA	NA	0	0	0	0	0	0
SPOP	c.398T>G	p.F133C	49619063	Substitution - Missense	COSM242645	12	1.60214	Likely pathogenic​	Likely pathogenic​	NA	NA	NA	NA	NA	0	0	0	0	0	0
SPOP	c.393G>C	p.W131C	49619068	Substitution - Missense	COSM5415481	11	1.46862	NA	Pathogenic	NA	NA	NA	NA	NA	0	0	0	0	0	0
SPOP	c.362G>A	p.R121Q	49619099	Substitution - Missense	COSM980811	10	1.33511	Pathogenic/Likely pathogenic​	Likely pathogenic​	NA	NA	NA	NA	NA	0	0	0	0	0	0
SPOP	c.388G>C	p.D130H	49619073	Substitution - Missense	COSM2698399	10	1.33511	NA	Uncertain significance​	NA	NA	NA	NA	NA	0	0	0	0	0	0
SRSF2	c.284C>A	p.P95H	76736877	Substitution - Missense	COSM211504	363	40.1993	NA	Uncertain significance​	5.5e-05	6.5e-05	0.000142	0.000118	0.000142	0	0	0	0	1	0
SRSF2	c.284C>T	p.P95L	76736877	Substitution - Missense	COSM146288	200	22.1484	Pathogenic​	Likely pathogenic​	1.8e-05	2.6e-05	NA	9.2e-05	9.2e-05	0	0	0	0	1	0
STAG2	c.646C>T	p.R216X	124045347	Substitution - Nonsense	COSM1315169	39	3.15024	NA	Pathogenic	NA	NA	NA	NA	NA	0	1	0	1	1	1
STAG2	c.775C>T	p.R259X	124047461	Substitution - Nonsense	COSM216178	19	1.53473	NA	Pathogenic	NA	NA	NA	9e-06	9e-06	0	0	0	0	0	0
STAG2	c.3034C>T	p.R1012X	124083530	Substitution - Nonsense	COSM211038	17	1.37318	Pathogenic	Pathogenic	NA	NA	NA	NA	NA	0	1	0	1	1	1
STAT3	c.1919A>T	p.Y640F	42322464	Substitution - Missense	COSM1155743	88	11.8121	Conflicting interpretations of pathogenicity​ Pathogenic(1); Uncertain significance(2)	Uncertain significance​	NA	NA	NA	7e-06	7e-06	0	0	0	0	1	0
STAT3	c.1981G>T	p.D661Y	42322402	Substitution - Missense	COSM1155739	70	9.39597	Uncertain significance​	Uncertain significance​	NA	NA	NA	7e-06	7e-06	0	0	0	0	1	0
STAT3	c.1852G>C	p.G618R	42323040	Substitution - Missense	COSM1166777	20	2.68456	Uncertain significance​	Uncertain significance​	NA	NA	NA	NA	NA	0	0	0	0	0	0
STAT3	c.1940A>T	p.N647I	42322443	Substitution - Missense	COSM1155744	19	2.55034	Conflicting interpretations of pathogenicity​ Pathogenic(1); Uncertain significance(1)	Uncertain significance​	NA	NA	NA	NA	NA	0	0	0	0	0	0
STK11	c.1062C>G	p.F354L	1223126	Substitution - Missense	COSM21360	70	7.89177	Benign/Likely benign	Benign	0.045921	0.045247	0.046224	0.00396	0.046224	1	0	0	0	0	0
STK11	c.109C>T	p.Q37X	1207022	Substitution - Nonsense	COSM12925	22	2.48027	Pathogenic​	Pathogenic​	NA	NA	NA	NA	NA	0	0	0	0	1	0
STK11	c.580G>T	p.D194Y	1220488	Substitution - Missense	COSM20944	17	1.91657	Pathogenic​	Likely pathogenic​	NA	NA	NA	NA	NA	0	0	0	0	0	0
STK11	c.647C>T	p.S216F	1220630	Substitution - Missense	COSM25844	16	1.80383	Uncertain significance​	Uncertain significance​	NA	NA	NA	NA	NA	0	0	0	0	0	0
STK11	c.667G>T	p.E223X	1220650	Substitution - Nonsense	COSM20870	15	1.69109	NA	Pathogenic​	NA	NA	NA	NA	NA	0	0	0	0	0	0
TERT	_C228T	-	1295228	Promoter	COSM1716558	-	-	NA	NA	NA	NA	NA	NA	NA	0	0	0	0	0	0
TERT	_C250T	-	1295250	Promoter	COSM1716559	-	-	NA	NA	NA	NA	NA	NA	NA	0	0	0	0	0	0
TET2	c.1648C>T	p.R550X	105235590	Substitution - Nonsense	COSM41644	55	1.88421	NA	Uncertain significance​	3.7e-05	3.9e-05	7.1e-05	4.6e-05	7.1e-05	0	0	0	0	1	0
TET2	c.4393C>T	p.R1465X	105272774	Substitution - Nonsense	COSM42016	41	1.40459	Uncertain significance​	Pathogenic​	NA	NA	NA	2e-05	2e-05	0	0	0	0	1	0
TP53	c.524G>A	p.R175H	7675088	Substitution - Missense	COSM10648	1586	4.44557	Pathogenic​	Pathogenic​	1.8e-05	NA	NA	7e-06	1.8e-05	0	335	71	1	1	1
TP53	c.743G>A	p.R248Q	7674220	Substitution - Missense	COSM10662	1122	3.14497	Pathogenic​	Pathogenic​	2.8e-05	NA	NA	2e-05	2.8e-05	0	93	0	1	1	1
TP53	c.818G>A	p.R273H	7673802	Substitution - Missense	COSM10660	1037	2.90672	Pathogenic	Pathogenic​	NA	NA	NA	2e-05	2e-05	0	64	2	1	1	1
TP53	c.817C>T	p.R273C	7673803	Substitution - Missense	COSM10659	981	2.74975	Pathogenic/Likely pathogenic​	Likely pathogenic​	9e-06	1.3e-05	3.5e-05	NA	3.5e-05	0	73	0	1	1	1
TP53	c.742C>T	p.R248W	7674221	Substitution - Missense	COSM10656	879	2.46384	Pathogenic​	Pathogenic​	NA	NA	NA	NA	NA	0	50	13	1	1	1
TP53	c.844C>T	p.R282W	7673776	Substitution - Missense	COSM10704	773	2.16672	Pathogenic/Likely pathogenic	Uncertain significance​	NA	NA	NA	7e-06	7e-06	0	128	0	1	1	1
TP53	c.637C>T	p.R213X	7674894	Substitution - Nonsense	COSM10654	573	1.60612	Pathogenic​	Pathogenic​	NA	NA	NA	NA	NA	0	41	0	1	1	1
TP53	c.733G>A	p.G245S	7674230	Substitution - Missense	COSM6932	540	1.51362	Pathogenic​	Pathogenic​	9e-06	1.3e-05	NA	7e-06	1.3e-05	0	32	2	1	1	1
TP53	c.747G>T	p.R249S	7674216	Substitution - Missense	COSM10817	486	1.36226	Conflicting interpretations of pathogenicity​ Pathogenic(4); Likely pathogenic(1); Uncertain significance(1)	Uncertain significance​	NA	NA	NA	NA	NA	0	32	14	1	1	1
TP53	c.659A>G	p.Y220C	7674872	Substitution - Missense	COSM10758	470	1.31741	Pathogenic​	Likely pathogenic​	NA	NA	NA	7e-06	7e-06	0	108	8	1	1	1
TP53	c.586C>T	p.R196X	7674945	Substitution - Nonsense	COSM10705	381	1.06794	Pathogenic​	Pathogenic​	NA	NA	NA	NA	NA	0	65	3	1	1	1
TP53	c.1024C>T	p.R342X	7670685	Substitution - Missense	COSM11073	340	0.953022	Pathogenic​	Pathogenic​	NA	NA	NA	NA	NA	0	8	0	1	1	1
TP53	c.916C>T	p.R306X	7673704	Substitution - Nonsense	COSM10663	282	0.790447	Pathogenic​	Pathogenic​	NA	NA	NA	NA	NA	0	5	0	1	1	1
TP53	c.469G>T	p.V157F	7675143	Substitution - Missense	COSM10670	266	0.745599	Conflicting interpretations of pathogenicity​ Pathogenic(3); Likely pathogenic(1); Uncertain significance(1)	Uncertain significance​	NA	NA	NA	NA	NA	0	57	0	1	1	1
TP53	c.536A>G	p.H179R	7675076	Substitution - Missense	COSM10889	233	0.6531	Conflicting interpretations of pathogenicity​ Pathogenic(3); Uncertain significance(2)	Likely pathogenic​	NA	NA	NA	7e-06	7e-06	0	62	0	1	1	1
TP53	c.853G>A	p.E285K	7673767	Substitution - Missense	COSM10722	233	0.6531	Pathogenic/Likely pathogenic​	Likely pathogenic​	NA	NA	NA	7e-06	7e-06	0	13	0	1	1	1
TP53	c.488A>G	p.Y163C	7675124	Substitution - Missense	COSM10808	222	0.622267	Pathogenic​	Likely pathogenic​	NA	NA	NA	7e-06	7e-06	0	72	0	1	1	1
TP53	c.527G>T	p.C176F	7675085	Substitution - Missense	COSM10645	214	0.599843	Pathogenic/Likely pathogenic​	Likely pathogenic​	NA	NA	NA	NA	NA	0	52	6	1	1	1
TP53	c.818G>T	p.R273L	7673802	Substitution - Missense	COSM10779	211	0.591434	Pathogenic​	Pathogenic​	NA	NA	NA	7e-06	7e-06	0	20	0	1	1	1
TP53	c.734G>A	p.G245D	7674229	Substitution - Missense	COSM43606	193	0.54098	Pathogenic/Likely pathogenic​	Likely pathogenic​	NA	NA	NA	7e-06	7e-06	0	14	1	1	1	1
TP53	c.722C>T	p.S241F	7674241	Substitution - Missense	COSM10812	181	0.507344	Pathogenic/Likely pathogenic​	Likely pathogenic​	NA	NA	NA	NA	NA	0	11	1	1	1	1
TP53	c.578A>G	p.H193R	7674953	Substitution - Missense	COSM10742	159	0.445678	Pathogenic/Likely pathogenic​	Likely pathogenic​	NA	NA	NA	NA	NA	0	47	0	1	1	1
TP53	c.535C>T	p.H179Y	7675077	Substitution - Missense	COSM10768	158	0.442875	Pathogenic/Likely pathogenic​	Likely pathogenic​	NA	NA	NA	7e-06	7e-06	0	1	1	1	1	1
TP53	c.584T>C	p.I195T	7674947	Substitution - Missense	COSM11089	150	0.420451	Conflicting interpretations of pathogenicity​ Pathogenic(5); Uncertain significance(1)	Likely pathogenic​	NA	NA	NA	NA	NA	0	1	2	1	1	1
TP53	c.574C>T	p.Q192X	7674957	Substitution - Nonsense	COSM10733	146	0.409239	Pathogenic​	Pathogenic​	NA	NA	NA	NA	NA	0	20	0	1	1	1
TP53	c.856G>A	p.E286K	7673764	Substitution - Missense	COSM10726	145	0.406436	Pathogenic	Likely pathogenic​	NA	NA	NA	NA	NA	0	20	7	1	1	1
TP53	c.701A>G	p.Y234C	7674262	Substitution - Missense	COSM10725	144	0.403633	Pathogenic/Likely pathogenic​	Likely pathogenic​	NA	NA	NA	NA	NA	0	1	0	1	1	1
TP53	c.711G>A	p.M237I	7674252	Substitution - Missense	COSM10834	140	0.392421	Pathogenic​	Likely pathogenic​	NA	NA	NA	7e-06	7e-06	0	40	8	1	1	1
TP53	c.713G>A	p.C238Y	7674250	Substitution - Missense	COSM11059	140	0.392421	Pathogenic/Likely pathogenic​	Likely pathogenic​	NA	NA	NA	2e-05	2e-05	0	4	1	1	1	1
TP53	c.814G>A	p.V272M	7673806	Substitution - Missense	COSM10891	135	0.378406	Pathogenic​	Uncertain significance​	NA	NA	NA	NA	NA	0	21	0	1	1	1
TP53	c.743G>T	p.R248L	7674220	Substitution - Missense	COSM6549	129	0.361588	Pathogenic​	Likely pathogenic​	NA	NA	NA	NA	NA	0	33	1	1	1	1
TP53	c.832C>T	p.P278S	7673788	Substitution - Missense	COSM10939	128	0.358785	Conflicting interpretations of pathogenicity​ Pathogenic(2); Uncertain significance(1)	Likely pathogenic​	NA	NA	NA	NA	NA	0	25	0	1	1	1
TP53	c.646G>A	p.V216M	7674885	Substitution - Missense	COSM10667	125	0.350376	Conflicting interpretations of pathogenicity​ Pathogenic(4); Likely pathogenic(3); Uncertain significance(1)	Uncertain significance​	NA	NA	NA	NA	NA	0	5	1	1	1	1
TP53	c.473G>A	p.R158H	7675139	Substitution - Missense	COSM10690	121	0.339164	Pathogenic/Likely pathogenic​	Likely pathogenic​	1.8e-05	3.9e-05	NA	7e-06	3.9e-05	0	5	1	1	1	1
TP53	c.641A>G	p.H214R	7674890	Substitution - Missense	COSM43687	121	0.339164	Likely pathogenic​	Likely pathogenic​	NA	NA	NA	NA	NA	0	2	1	1	1	1
TP53	c.527G>A	p.C176Y	7675085	Substitution - Missense	COSM10687	120	0.336361	Pathogenic​	Likely pathogenic​	NA	NA	NA	NA	NA	0	22	5	1	1	1
TP53	c.473G>T	p.R158L	7675139	Substitution - Missense	COSM10714	120	0.336361	Pathogenic​	Likely pathogenic​	NA	NA	NA	NA	NA	0	4	1	1	1	1
TP53	c.839G>C	p.R280T	7673781	Substitution - Missense	COSM10724	118	0.330755	Pathogenic/Likely pathogenic​	Uncertain significance​	NA	NA	NA	NA	NA	0	29	0	1	1	1
TP53	c.422G>A	p.C141Y	7675190	Substitution - Missense	COSM43708	116	0.325149	Pathogenic​	Likely pathogenic​	NA	NA	NA	NA	NA	0	1	1	1	1	1
TP53	c.455C>T	p.P152L	7675157	Substitution - Missense	COSM10790	116	0.325149	Pathogenic​	Likely pathogenic​	NA	NA	NA	7e-06	7e-06	0	27	0	1	1	1
TP53	c.725G>T	p.C242F	7674238	Substitution - Missense	COSM10810	115	0.322346	Conflicting interpretations of pathogenicity​ Pathogenic(1); Uncertain significance(1)	Likely pathogenic​	NA	NA	NA	NA	NA	0	2	0	1	1	1
TP53	c.614A>G	p.Y205C	7674917	Substitution - Missense	COSM43947	114	0.319543	Pathogenic​	Likely pathogenic​	NA	NA	NA	NA	NA	0	48	0	1	1	1
TP53	c.833C>T	p.P278L	7673787	Substitution - Missense	COSM10863	112	0.313937	Conflicting interpretations of pathogenicity​ Pathogenic(2); Uncertain significance(1)	Uncertain significance​	NA	NA	NA	NA	NA	0	5	1	1	1	1
TP53	c.734G>T	p.G245V	7674229	Substitution - Missense	COSM11196	112	0.313937	Pathogenic​	Pathogenic​	NA	NA	NA	7e-06	7e-06	0	34	0	1	1	1
TP53	c.797G>A	p.G266E	7673823	Substitution - Missense	COSM10867	111	0.311134	Pathogenic/Likely pathogenic​	Likely pathogenic​	NA	NA	NA	NA	NA	0	5	1	1	1	1
TP53	c.839G>A	p.R280K	7673781	Substitution - Missense	COSM10728	109	0.305528	Conflicting interpretations of pathogenicity​ Pathogenic(1); Likely pathogenic(1); Uncertain significance(1)	Uncertain significance​	NA	NA	NA	NA	NA	0	7	0	1	1	1
TP53	c.451C>T	p.P151S	7675161	Substitution - Missense	COSM10905	107	0.299922	Pathogenic/Likely pathogenic​	Likely pathogenic​	9e-06	1.3e-05	3.5e-05	NA	3.5e-05	0	2	10	1	1	1
TP53	c.707A>G	p.Y236C	7674256	Substitution - Missense	COSM10731	107	0.299922	Conflicting interpretations of pathogenicity​ Pathogenic(1); Likely pathogenic(1); Uncertain significance(1)	Uncertain significance​	NA	NA	NA	NA	NA	0	3	0	1	1	1
TP53	c.581T>G	p.L194R	7674950	Substitution - Missense	COSM44571	100	0.2803	Conflicting interpretations of pathogenicity​ Pathogenic(2); Uncertain significance(1)	Uncertain significance​	NA	NA	NA	NA	NA	0	6	0	1	1	1
TP53	c.733G>T	p.G245C	7674230	Substitution - Missense	COSM11081	99	0.277497	Pathogenic​	Likely pathogenic​	NA	NA	NA	NA	NA	0	12	0	1	1	1
TP53	c.796G>A	p.G266R	7673824	Substitution - Missense	COSM10794	98	0.274694	Pathogenic​	Uncertain significance​	NA	NA	NA	NA	NA	0	25	0	1	1	1
TP53	c.404G>A	p.C135Y	7675208	Substitution - Missense	COSM10801	97	0.271891	Conflicting interpretations of pathogenicity​ Pathogenic(2); Likely pathogenic(1); Uncertain significance(1)	Uncertain significance​	NA	NA	NA	NA	NA	0	25	5	1	1	1
TP53	c.517G>T	p.V173L	7675095	Substitution - Missense	COSM43559	95	0.266285	Pathogenic/Likely pathogenic​	Likely pathogenic​	NA	NA	NA	NA	NA	0	6	1	1	1	1
TP53	c.517G>A	p.V173M	7675095	Substitution - Missense	COSM11084	93	0.260679	Pathogenic​	Likely pathogenic​	9e-06	NA	NA	NA	9e-06	0	5	1	1	1	1
TP53	c.395A>G	p.K132R	7675217	Substitution - Missense	COSM11582	91	0.255073	Pathogenic​	Likely pathogenic​	NA	NA	NA	7e-06	7e-06	0	18	1	1	1	1
TP53	c.380C>T	p.S127F	7675232	Substitution - Missense	COSM44226	89	0.249467	Conflicting interpretations of pathogenicity​ Pathogenic(2); Likely pathogenic(2); Uncertain significance(1)	Uncertain significance​	NA	NA	NA	NA	NA	0	5	3	1	1	1
TP53	c.824G>A	p.C275Y	7673796	Substitution - Missense	COSM10893	83	0.232649	Pathogenic/Likely pathogenic​	Likely pathogenic​	NA	NA	NA	7e-06	7e-06	0	2	4	1	1	1
TP53	c.404G>T	p.C135F	7675208	Substitution - Missense	COSM10647	81	0.227043	Pathogenic​	Uncertain significance​	NA	NA	NA	NA	NA	0	21	7	1	1	1
TP53	c.730G>T	p.G244C	7674233	Substitution - Missense	COSM11524	79	0.221437	Conflicting interpretations of pathogenicity​ Pathogenic(3); Uncertain significance(1)	Likely pathogenic​	NA	NA	NA	NA	NA	0	1	1	1	1	1
TP53	c.577C>T	p.H193Y	7674954	Substitution - Missense	COSM10672	76	0.213028	Pathogenic/Likely pathogenic​	Likely pathogenic​	NA	NA	NA	NA	NA	0	0	1	0	1	1
TP53	c.749C>T	p.P250L	7674214	Substitution - Missense	COSM10771	75	0.210225	Conflicting interpretations of pathogenicity​ Pathogenic(1); Likely pathogenic(2); Uncertain significance(1)	Uncertain significance​	NA	NA	NA	NA	NA	0	21	1	1	1	1
TP53	c.772G>A	p.E258K	7674191	Substitution - Missense	COSM10988	75	0.210225	Pathogenic/Likely pathogenic​	Likely pathogenic​	NA	NA	NA	NA	NA	0	3	1	1	1	1
TP53	c.824G>T	p.C275F	7673796	Substitution - Missense	COSM10701	74	0.207422	Pathogenic​	Likely pathogenic​	NA	NA	NA	NA	NA	0	10	0	1	1	1
TP53	c.725G>A	p.C242Y	7674238	Substitution - Missense	COSM10646	73	0.204619	Pathogenic​	Likely pathogenic​	NA	NA	NA	7e-06	7e-06	0	7	0	1	1	1
TP53	c.481G>A	p.A161T	7675131	Substitution - Missense	COSM10739	73	0.204619	Pathogenic/Likely pathogenic​	Uncertain significance​	NA	NA	NA	NA	NA	0	20	4	1	1	1
TP53	c.736A>G	p.M246V	7674227	Substitution - Missense	COSM43555	72	0.201816	Pathogenic​	Likely pathogenic​	NA	NA	NA	7e-06	7e-06	0	15	1	1	1	1
TP53	c.797G>T	p.G266V	7673823	Substitution - Missense	COSM10958	72	0.201816	Conflicting interpretations of pathogenicity​ Pathogenic(1); Uncertain significance(3)	Likely pathogenic​	NA	NA	NA	NA	NA	0	1	1	1	1	1
TP53	c.638G>T	p.R213L	7674893	Substitution - Missense	COSM43650	71	0.199013	Uncertain significance​	Likely pathogenic​	NA	NA	NA	NA	NA	0	10	7	1	1	1
TP53	c.713G>T	p.C238F	7674250	Substitution - Missense	COSM43778	71	0.199013	Pathogenic/Likely pathogenic​	Likely pathogenic​	NA	NA	NA	NA	NA	0	0	1	0	1	1
TP53	c.578A>T	p.H193L	7674953	Substitution - Missense	COSM11066	70	0.19621	Conflicting interpretations of pathogenicity​ Pathogenic(1); Uncertain significance(1)	Likely pathogenic​	NA	NA	NA	NA	NA	0	50	0	1	1	1
TP53	c.476C>T	p.A159V	7675136	Substitution - Missense	COSM11148	69	0.193407	Pathogenic/Likely pathogenic​	Uncertain significance​	NA	NA	NA	NA	NA	0	1	0	1	1	1
TP53	c.406C>T	p.Q136X	7675206	Substitution - Nonsense	COSM11166	69	0.193407	Pathogenic​	Pathogenic​	NA	NA	NA	NA	NA	0	28	0	1	1	1
TP53	c.461G>T	p.G154V	7675151	Substitution - Missense	COSM6815	68	0.190604	Uncertain significance​	Uncertain significance​	NA	NA	NA	NA	NA	0	4	0	1	1	1
TP53	c.731G>A	p.G244D	7674232	Substitution - Missense	COSM10883	68	0.190604	Pathogenic/Likely pathogenic​	Likely pathogenic​	NA	NA	NA	NA	NA	0	2	1	1	1	1
TP53	c.437G>A	p.W146X	7675175	Substitution - Nonsense	COSM43609	68	0.190604	Pathogenic​	Pathogenic​	NA	NA	NA	NA	NA	0	7	4	1	1	1
TP53	c.811G>A	p.E271K	7673809	Substitution - Missense	COSM10719	67	0.187801	Conflicting interpretations of pathogenicity​ Likely pathogenic(2); Uncertain significance(3)	Uncertain significance​	NA	NA	NA	NA	NA	0	1	1	1	1	1
TP53	c.638G>A	p.R213Q	7674893	Substitution - Missense	COSM10735	66	0.184998	Pathogenic​	Pathogenic​	NA	NA	NA	NA	NA	0	2	2	1	1	1
TP53	c.715A>G	p.N239D	7674248	Substitution - Missense	COSM10777	66	0.184998	Conflicting interpretations of pathogenicity​ Pathogenic(1); Likely pathogenic(2); Uncertain significance(1)	Uncertain significance​	NA	NA	NA	NA	NA	0	6	7	1	1	1
TP53	c.493C>T	p.Q165X	7675119	Substitution - Nonsense	COSM43632	65	0.182195	Pathogenic​	Pathogenic​	NA	NA	NA	NA	NA	0	26	0	1	1	1
TP53	c.536A>T	p.H179L	7675076	Substitution - Missense	COSM43635	62	0.173786	Conflicting interpretations of pathogenicity​ Likely pathogenic(1); Uncertain significance(1)	Uncertain significance​	NA	NA	NA	NA	NA	0	0	1	0	1	1
TP53	c.438G>A	p.W146X	7675174	Substitution - Nonsense	COSM10727	62	0.173786	Pathogenic​	Pathogenic​	NA	NA	NA	NA	NA	0	10	0	1	1	1
TP53	c.592G>T	p.E198X	7674939	Substitution - Nonsense	COSM44241	60	0.16818	Pathogenic​	Pathogenic​	NA	NA	NA	NA	NA	0	1	1	1	1	1
TP53	c.610G>T	p.E204X	7674921	Substitution - Nonsense	COSM10804	59	0.165377	Pathogenic​	Pathogenic​	NA	NA	NA	NA	NA	0	14	0	1	1	1
TP53	c.711G>T	p.M237I	7674252	Substitution - Missense	COSM11063	58	0.162574	Likely pathogenic​	Likely pathogenic​	NA	NA	NA	NA	NA	0	7	0	1	1	1
TP53	c.430C>T	p.Q144X	7675182	Substitution - Nonsense	COSM11245	57	0.159771	Pathogenic​	Pathogenic​	NA	NA	NA	NA	NA	0	2	1	1	1	1
TP53	c.722C>G	p.S241C	7674241	Substitution - Missense	COSM10709	57	0.159771	Pathogenic/Likely pathogenic​	Pathogenic​	NA	NA	NA	NA	NA	0	1	0	1	1	1
TP53	c.746G>T	p.R249M	7674217	Substitution - Missense	COSM43871	56	0.156968	Uncertain significance​	Likely pathogenic​	NA	NA	NA	NA	NA	0	8	0	1	1	1
TP53	c.841G>C	p.D281H	7673779	Substitution - Missense	COSM10943	56	0.156968	Conflicting interpretations of pathogenicity​ Pathogenic(1); Uncertain significance(1)	Likely pathogenic​	NA	NA	NA	NA	NA	0	0	1	0	1	1
TP53	c.730G>A	p.G244S	7674233	Substitution - Missense	COSM10941	55	0.154165	Pathogenic​	Likely pathogenic​	NA	NA	NA	NA	NA	0	8	0	1	1	1
TP53	c.329G>T	p.R110L	7676040	Substitution - Missense	COSM10716	55	0.154165	Pathogenic/Likely pathogenic​	Uncertain significance​	NA	NA	NA	7e-06	7e-06	0	10	0	1	1	1
TP53	c.814G>T	p.V272L	7673806	Substitution - Missense	COSM10859	54	0.151362	Likely pathogenic​	Uncertain significance​	NA	NA	NA	NA	NA	0	2	0	1	1	1
TP53	c.396G>C	p.K132N	7675216	Substitution - Missense	COSM43963	54	0.151362	Likely pathogenic​	Likely pathogenic​	NA	NA	NA	NA	NA	0	15	1	1	1	1
TP53	c.830G>T	p.C277F	7673790	Substitution - Missense	COSM10749	53	0.148559	Conflicting interpretations of pathogenicity​ Likely pathogenic(1); Uncertain significance(1)	Uncertain significance​	NA	NA	NA	NA	NA	0	0	2	0	1	1
TP53	c.799C>T	p.R267W	7673821	Substitution - Missense	COSM11183	52	0.145756	Pathogenic/Likely pathogenic​	Likely pathogenic​	NA	NA	NA	NA	NA	0	1	1	1	1	1
TP53	c.745A>T	p.R249W	7674218	Substitution - Missense	COSM43629	51	0.142953	Conflicting interpretations of pathogenicity​ Pathogenic(1); Likely pathogenic(1); Uncertain significance(1)	Uncertain significance​	NA	NA	NA	NA	NA	0	1	1	1	1	1
TP53	c.838A>G	p.R280G	7673782	Substitution - Missense	COSM11123	51	0.142953	Conflicting interpretations of pathogenicity​ Pathogenic(1); Uncertain significance(1)	Uncertain significance​	NA	NA	NA	NA	NA	0	6	1	1	1	1
TP53	c.836G>A	p.G279E	7673784	Substitution - Missense	COSM43714	50	0.14015	Conflicting interpretations of pathogenicity​ Pathogenic(3); Likely pathogenic(3); Uncertain significance(1)	Likely pathogenic​	NA	NA	NA	NA	NA	0	8	1	1	1	1
TP53	c.844C>G	p.R282G	7673776	Substitution - Missense	COSM10992	50	0.14015	Pathogenic​	Uncertain significance​	NA	NA	NA	NA	NA	0	12	0	1	1	1
TP53	c.569C>T	p.P190L	7674962	Substitution - Missense	COSM43657	50	0.14015	Likely pathogenic​	Uncertain significance​	NA	NA	NA	NA	NA	0	22	0	1	1	1
TP53	c.833C>G	p.P278R	7673787	Substitution - Missense	COSM10887	50	0.14015	Conflicting interpretations of pathogenicity​ Pathogenic(1); Uncertain significance(3)	Uncertain significance​	NA	NA	NA	NA	NA	0	2	1	1	1	1
TP53	c.475G>C	p.A159P	7675137	Substitution - Missense	COSM43836	50	0.14015	Uncertain significance​	Uncertain significance​	NA	NA	NA	NA	NA	0	8	0	1	1	1
TP53	c.396G>T	p.K132N	7675216	Substitution - Missense	COSM10991	49	0.137347	Pathogenic/Likely pathogenic​	Uncertain significance​	NA	NA	NA	NA	NA	0	10	2	1	1	1
TP53	c.832C>A	p.P278T	7673788	Substitution - Missense	COSM43697	49	0.137347	Pathogenic​	Likely pathogenic​	NA	NA	NA	NA	NA	0	0	1	0	1	1
TP53	c.548C>G	p.S183X	7675064	Substitution - Nonsense	COSM10706	49	0.137347	Pathogenic​	Pathogenic​	NA	NA	NA	NA	NA	0	0	1	0	1	1
TP53	c.583A>T	p.I195F	7674948	Substitution - Missense	COSM44633	48	0.134544	Conflicting interpretations of pathogenicity​ Pathogenic(2); Likely pathogenic(1); Uncertain significance(1)	Uncertain significance​	NA	NA	NA	NA	NA	0	52	0	1	1	1
TP53	c.452C>A	p.P151H	7675160	Substitution - Missense	COSM11476	47	0.131741	Uncertain significance​	Uncertain significance​	NA	NA	NA	NA	NA	0	2	2	1	1	1
TP53	c.820G>T	p.V274F	7673800	Substitution - Missense	COSM10769	47	0.131741	Conflicting interpretations of pathogenicity​ Pathogenic(1); Uncertain significance(1)	Uncertain significance​	NA	NA	NA	NA	NA	0	10	0	1	1	1
TP53	c.775G>T	p.D259Y	7674188	Substitution - Missense	COSM11552	46	0.128938	Uncertain significance​	Uncertain significance​	NA	NA	NA	NA	NA	0	14	1	1	1	1
TP53	c.745A>G	p.R249G	7674218	Substitution - Missense	COSM10668	46	0.128938	Conflicting interpretations of pathogenicity​ Pathogenic(1); Uncertain significance(3)	Uncertain significance​	NA	NA	NA	NA	NA	0	3	1	1	1	1
TP53	c.499C>T	p.Q167X	7675113	Substitution - Nonsense	COSM11333	45	0.126135	Pathogenic/Likely pathogenic​	Pathogenic​	NA	NA	NA	NA	NA	0	4	0	1	1	1
TP53	c.644G>T	p.S215I	7674887	Substitution - Missense	COSM11450	45	0.126135	Pathogenic​	Likely pathogenic​	NA	NA	NA	NA	NA	0	10	0	1	1	1
TP53	c.700T>C	p.Y234H	7674263	Substitution - Missense	COSM11152	44	0.123332	Pathogenic	Likely pathogenic​	NA	NA	NA	NA	NA	0	10	1	1	1	1
TP53	c.841G>A	p.D281N	7673779	Substitution - Missense	COSM43596	44	0.123332	Pathogenic​	Likely pathogenic​	9e-06	NA	NA	7e-06	9e-06	0	1	1	1	1	1
TP53	c.427G>A	p.V143M	7675185	Substitution - Missense	COSM43878	43	0.120529	Conflicting interpretations of pathogenicity​ Pathogenic(2); Likely pathogenic(2); Uncertain significance(2)	Uncertain significance​	NA	NA	NA	NA	NA	0	1	1	1	1	1
TP53	c.298C>T	p.Q100X	7676071	Substitution - Nonsense	COSM44032	43	0.120529	Pathogenic/Likely pathogenic​	Pathogenic​	NA	NA	NA	NA	NA	0	18	0	1	1	1
TP53	c.716A>G	p.N239S	7674247	Substitution - Missense	COSM44094	43	0.120529	Likely pathogenic​	Likely pathogenic​	NA	NA	NA	NA	NA	0	2	1	1	1	1
TP53	c.310C>T	p.Q104X	7676059	Substitution - Nonsense	COSM10886	43	0.120529	Pathogenic​	Pathogenic​	NA	NA	NA	NA	NA	0	9	0	1	1	1
TP53	c.763A>T	p.I255F	7674200	Substitution - Missense	COSM43651	43	0.120529	Conflicting interpretations of pathogenicity​ Likely pathogenic(1); Uncertain significance(1)	Uncertain significance​	NA	NA	NA	NA	NA	0	5	0	1	1	1
TP53	c.542G>A	p.R181H	7675070	Substitution - Missense	COSM10738	42	0.117726	Conflicting interpretations of pathogenicity​ Pathogenic(3); Likely pathogenic(11); Uncertain significance(1)	Likely pathogenic​	9e-06	1.3e-05	NA	1.3e-05	1.3e-05	0	10	1	1	1	1
TP53	c.821T>C	p.V274A	7673799	Substitution - Missense	COSM44393	41	0.114923	Conflicting interpretations of pathogenicity​ Likely pathogenic(1); Uncertain significance(1)	Uncertain significance​	NA	NA	NA	NA	NA	0	10	1	1	1	1
TP53	c.464C>A	p.T155N	7675148	Substitution - Missense	COSM11218	41	0.114923	Conflicting interpretations of pathogenicity​ Pathogenic(1); Likely pathogenic(3); Uncertain significance(1)	Uncertain significance​	NA	NA	NA	NA	NA	0	0	1	0	1	1
TP53	c.832C>G	p.P278A	7673788	Substitution - Missense	COSM10814	41	0.114923	Conflicting interpretations of pathogenicity​ Pathogenic(1); Likely pathogenic(1); Uncertain significance(1)	Likely pathogenic​	NA	NA	NA	NA	NA	0	8	0	1	1	1
TP53	c.746G>C	p.R249T	7674217	Substitution - Missense	COSM43665	40	0.11212	Pathogenic​	Likely pathogenic​	NA	NA	NA	NA	NA	0	0	1	0	1	1
TP53	c.818G>C	p.R273P	7673802	Substitution - Missense	COSM43896	40	0.11212	Pathogenic​	Likely pathogenic​	NA	NA	NA	7e-06	7e-06	0	3	4	1	1	1
TP53	c.375G>T	p.T125T	7675994	Substitution - Missense	COSM45940	40	0.11212	Pathogenic​	Likely benign	NA	NA	NA	NA	NA	0	20	0	1	1	1
TP53	c.467G>C	p.R156P	7675145	Substitution - Missense	COSM10760	39	0.109317	Uncertain significance​	Uncertain significance​	NA	NA	NA	NA	NA	0	0	1	0	1	1
TP53	c.580C>T	p.L194F	7674951	Substitution - Missense	COSM10995	39	0.109317	Pathogenic/Likely pathogenic​	Likely pathogenic​	NA	NA	NA	NA	NA	0	1	0	1	1	1
TP53	c.845G>A	p.R282Q	7673775	Substitution - Missense	COSM44338	39	0.109317	Conflicting interpretations of pathogenicity​ Likely pathogenic(2); Uncertain significance(8)	Likely pathogenic​	NA	NA	NA	1.3e-05	1.3e-05	0	33	6	1	1	1
TP53	c.514G>T	p.V172F	7675098	Substitution - Missense	COSM44240	39	0.109317	Conflicting interpretations of pathogenicity​ Pathogenic(1); Uncertain significance(1)	Likely pathogenic​	NA	NA	NA	1e-06	1e-06	0	0	1	0	1	1
TP53	c.772G>T	p.E258X	7674191	Substitution - Nonsense	COSM43568	38	0.106514	Pathogenic​	Pathogenic​	NA	NA	NA	NA	NA	0	4	1	1	1	1
TP53	c.329G>C	p.R110P	7676040	Substitution - Missense	COSM11250	38	0.106514	Pathogenic​	Uncertain significance​	NA	NA	NA	NA	NA	0	0	1	0	1	1
TP53	c.856G>T	p.E286X	7673764	Substitution - Nonsense	COSM43919	37	0.103711	Pathogenic​	Pathogenic​	NA	NA	NA	NA	NA	0	1	0	1	1	1
TP53	c.511G>T	p.E171X	7675101	Substitution - Nonsense	COSM10996	37	0.103711	Pathogenic​	Pathogenic​	NA	NA	NA	NA	NA	0	0	0	0	0	0
TP53	c.541C>T	p.R181C	7675071	Substitution - Missense	COSM11090	36	0.100908	Conflicting interpretations of pathogenicity​ Pathogenic(1); Likely pathogenic(2); Uncertain significance(1)	Uncertain significance​	NA	NA	NA	7e-06	7e-06	0	0	4	0	1	1
TP53	c.811G>T	p.E271X	7673809	Substitution - Nonsense	COSM43750	36	0.100908	Pathogenic​	Pathogenic​	NA	NA	NA	NA	NA	0	0	0	0	0	0
TP53	c.473G>C	p.R158P	7675139	Substitution - Missense	COSM43615	36	0.100908	Likely pathogenic​	Likely pathogenic​	NA	NA	NA	NA	NA	0	0	0	0	0	0
TP53	c.405C>G	p.C135W	7675207	Substitution - Missense	COSM44219	35	0.0981052	Conflicting interpretations of pathogenicity​ Likely pathogenic(1); Uncertain significance(4)	Uncertain significance​	NA	NA	NA	NA	NA	0	0	1	0	1	1
TP53	c.800G>C	p.R267P	7673820	Substitution - Missense	COSM11392	35	0.0981052	Conflicting interpretations of pathogenicity​ Pathogenic(1); Uncertain significance(1)	Uncertain significance​	NA	NA	NA	NA	NA	0	0	0	0	0	0
TP53	c.853G>T	p.E285X	7673767	Substitution - Nonsense	COSM44388	35	0.0981052	NA	Pathogenic​	NA	NA	NA	NA	NA	0	0	0	0	0	0
TP53	c.738G>A	p.M246I	7674225	Substitution - Missense	COSM44310	35	0.0981052	Pathogenic/Likely pathogenic	Uncertain significance​	NA	NA	NA	NA	NA	0	12	0	1	1	1
TP53	c.584T>A	p.I195N	7674947	Substitution - Missense	COSM44877	34	0.0953022	Conflicting interpretations of pathogenicity​ Pathogenic(1); Uncertain significance(3)	Likely pathogenic​	NA	NA	NA	NA	NA	0	20	0	1	1	1
TP53	c.523C>G	p.R175G	7675089	Substitution - Missense	COSM10870	34	0.0953022	Pathogenic​	Likely pathogenic​	NA	NA	NA	NA	NA	0	0	0	0	0	0
TP53	c.394A>G	p.K132E	7675218	Substitution - Missense	COSM10813	34	0.0953022	Pathogenic/Likely pathogenic​	Uncertain significance​	NA	NA	NA	NA	NA	0	0	0	0	0	0
TP53	c.785G>T	p.G262V	7673835	Substitution - Missense	COSM11198	34	0.0953022	Uncertain significance​	Uncertain significance​	NA	NA	NA	NA	NA	0	16	0	1	1	1
TP53	c.375G>A	p.T125T	7675994	Substitution - Missense	COSM43904	34	0.0953022	Pathogenic​	Likely benign	NA	NA	NA	7e-06	7e-06	0	8	0	1	1	1
TP53	c.794T>C	p.L265P	7673826	Substitution - Missense	COSM11011	33	0.0924992	Pathogenic/Likely pathogenic	Likely pathogenic​	NA	NA	NA	NA	NA	0	0	0	0	0	0
TP53	c.722C>A	p.S241Y	7674241	Substitution - Missense	COSM10935	33	0.0924992	Pathogenic​	Likely pathogenic​	NA	NA	NA	NA	NA	0	0	0	0	0	0
TP53	c.839G>T	p.R280I	7673781	Substitution - Missense	COSM11287	32	0.0896962	Uncertain significance​	Uncertain significance​	NA	NA	NA	NA	NA	0	0	0	0	0	0
TP53	c.528C>G	p.C176W	7675084	Substitution - Missense	COSM11114	32	0.0896962	Conflicting interpretations of pathogenicity​ Likely pathogenic(1); Uncertain significance(1)	Uncertain significance​	NA	NA	NA	NA	NA	0	0	0	0	0	0
TP53	c.643A>G	p.S215G	7674888	Substitution - Missense	COSM43951	32	0.0896962	Conflicting interpretations of pathogenicity​ Pathogenic(1); Likely pathogenic(2); Uncertain significance(3)	Uncertain significance​	NA	NA	NA	NA	NA	0	0	0	0	0	0
TP53	c.859G>T	p.E287X	7673761	Substitution - Nonsense	COSM44133	31	0.0868931	NA	Pathogenic​	NA	NA	NA	NA	NA	0	13	0	1	1	1
TP53	c.742C>G	p.R248G	7674221	Substitution - Missense	COSM11564	31	0.0868931	Pathogenic/Likely pathogenic​	Likely pathogenic​	NA	NA	NA	NA	NA	0	0	0	0	0	0
TP53	c.747G>C	p.R249S	7674216	Substitution - Missense	COSM10785	30	0.0840901	Uncertain significance​	Uncertain significance​	NA	NA	NA	NA	NA	0	0	0	0	0	0
TP53	c.487T>A	p.Y163N	7675125	Substitution - Missense	COSM44623	30	0.0840901	Conflicting interpretations of pathogenicity​ Likely pathogenic(1); Uncertain significance(1)	Pathogenic​	NA	NA	NA	NA	NA	0	1	0	1	1	1
TP53	c.725G>C	p.C242S	7674238	Substitution - Missense	COSM11133	30	0.0840901	Uncertain significance​	Likely pathogenic​	NA	NA	NA	NA	NA	0	1	1	1	1	1
TP53	c.848G>C	p.R283P	7673772	Substitution - Missense	COSM10743	30	0.0840901	Conflicting interpretations of pathogenicity​ Likely pathogenic(1); Uncertain significance(3)	Uncertain significance​	NA	NA	NA	NA	NA	0	0	1	0	1	1
TP53	c.487T>C	p.Y163H	7675125	Substitution - Missense	COSM43846	30	0.0840901	Uncertain significance​	Likely pathogenic​	NA	NA	NA	NA	NA	0	0	0	0	0	0
TP53	c.524G>T	p.R175L	7675088	Substitution - Missense	COSM10718	30	0.0840901	Pathogenic/Likely pathogenic​	Likely pathogenic​	NA	NA	NA	NA	NA	0	0	0	0	0	0
TP53	c.535C>A	p.H179N	7675077	Substitution - Missense	COSM44151	30	0.0840901	Conflicting interpretations of pathogenicity​ Likely pathogenic(2); Uncertain significance(1)	Likely pathogenic​	NA	NA	NA	NA	NA	0	0	0	0	0	0
TP53	c.817C>A	p.R273S	7673803	Substitution - Missense	COSM43909	30	0.0840901	Pathogenic​	Likely pathogenic​	NA	NA	NA	NA	NA	0	0	0	0	0	0
TP53	c.454C>T	p.P152S	7675158	Substitution - Missense	COSM43582	29	0.0812871	Conflicting interpretations of pathogenicity​ Pathogenic(1); Likely pathogenic(1); Uncertain significance(1)	Uncertain significance​	9e-06	NA	NA	NA	9e-06	0	0	0	0	0	0
TP53	c.388C>G	p.L130V	7675224	Substitution - Missense	COSM11462	29	0.0812871	Conflicting interpretations of pathogenicity​ Pathogenic(1); Uncertain significance(4)	Uncertain significance​	NA	NA	NA	NA	NA	0	0	0	0	0	0
TP53	c.796G>T	p.G266X	7673824	Substitution - Nonsense	COSM44891	29	0.0812871	Pathogenic​	Pathogenic​	NA	NA	NA	NA	NA	0	0	0	0	0	0
TP53	c.535C>G	p.H179D	7675077	Substitution - Missense	COSM44776	29	0.0812871	Conflicting interpretations of pathogenicity​ Pathogenic(2); Likely pathogenic(1); Uncertain significance(1)	Likely pathogenic​	NA	NA	NA	NA	NA	0	0	0	0	0	0
TP53	c.596G>T	p.G199V	7674935	Substitution - Missense	COSM44140	28	0.0784841	Likely pathogenic​	Likely pathogenic​	NA	NA	NA	NA	NA	0	1	0	1	1	1
TP53	c.523C>T	p.R175C	7675089	Substitution - Missense	COSM43680	28	0.0784841	Uncertain significance​	Likely pathogenic​	2.8e-05	3.9e-05	3.5e-05	2e-05	3.9e-05	0	0	0	0	0	0
TP53	c.530C>T	p.P177L	7675082	Substitution - Missense	COSM44097	28	0.0784841	Conflicting interpretations of pathogenicity​ Likely pathogenic(1); Uncertain significance(2)	Uncertain significance​	NA	NA	NA	7e-06	7e-06	0	0	0	0	0	0
TP53	c.743G>C	p.R248P	7674220	Substitution - Missense	COSM11491	28	0.0784841	Pathogenic/Likely pathogenic	Likely pathogenic​	NA	NA	NA	NA	NA	0	1	0	1	1	1
TP53	c.380C>A	p.S127Y	7675232	Substitution - Missense	COSM43970	28	0.0784841	Pathogenic​	Uncertain significance​	NA	NA	NA	NA	NA	0	10	0	1	1	1
TP53	c.400T>C	p.F134L	7675212	Substitution - Missense	COSM44654	28	0.0784841	Uncertain significance	Likely pathogenic​	NA	NA	NA	NA	NA	0	0	0	0	0	0
TP53	c.526T>A	p.C176S	7675086	Substitution - Missense	COSM44146	28	0.0784841	Conflicting interpretations of pathogenicity​ Likely pathogenic(1); Uncertain significance(2)	Likely pathogenic​	NA	NA	NA	NA	NA	0	9	0	1	1	1
TP53	c.843C>A	p.D281E	7673777	Substitution - Missense	COSM43906	28	0.0784841	Conflicting interpretations of pathogenicity​ Likely pathogenic(3); Uncertain significance(1)	Uncertain significance​	NA	NA	NA	NA	NA	0	0	0	0	0	0
TP53	c.313G>T	p.G105C	7676056	Substitution - Missense	COSM44481	28	0.0784841	NA	Likely pathogenic​	NA	NA	NA	NA	NA	0	6	0	1	1	1
TP53	c.374C>T	p.T125M	7675995	Substitution - Missense	COSM44988	27	0.0756811	Conflicting interpretations of pathogenicity​ Pathogenic(1); Likely pathogenic(8); Uncertain significance(1)	Likely pathogenic​	9e-06	NA	NA	7e-06	9e-06	0	33	0	1	1	1
TP53	c.377A>G	p.Y126C	7675235	Substitution - Missense	COSM11517	27	0.0756811	Conflicting interpretations of pathogenicity​ Pathogenic(1); Uncertain significance(4)	Uncertain significance​	NA	NA	NA	NA	NA	0	0	0	0	0	0
TP53	c.517G>C	p.V173L	7675095	Substitution - Missense	COSM44057	27	0.0756811	Uncertain significance​	Likely pathogenic​	NA	NA	NA	NA	NA	0	0	0	0	0	0
TP53	c.503A>G	p.H168R	7675109	Substitution - Missense	COSM43545	27	0.0756811	Conflicting interpretations of pathogenicity​ Pathogenic(1); Uncertain significance(1)	Uncertain significance​	NA	NA	NA	NA	NA	0	0	0	0	0	0
TP53	c.658T>A	p.Y220N	7674873	Substitution - Missense	COSM44672	27	0.0756811	Conflicting interpretations of pathogenicity​ Pathogenic(1); Likely pathogenic(1); Uncertain significance(1)	Likely pathogenic​	NA	NA	NA	NA	NA	0	0	0	0	0	0
TP53	c.587G>C	p.R196P	7674944	Substitution - Missense	COSM43814	27	0.0756811	Pathogenic/Likely pathogenic​	Uncertain significance​	NA	NA	NA	NA	NA	0	0	0	0	0	0
TP53	c.526T>C	p.C176R	7675086	Substitution - Missense	COSM44948	27	0.0756811	Conflicting interpretations of pathogenicity​ Pathogenic(1); Likely pathogenic(1); Uncertain significance(1)	Uncertain significance​	NA	NA	NA	NA	NA	0	0	0	0	0	0
TP53	c.451C>G	p.P151A	7675161	Substitution - Missense	COSM44944	27	0.0756811	Pathogenic​	Likely pathogenic​	NA	NA	NA	NA	NA	0	1	0	1	1	1
TP53	c.463A>C	p.T155P	7675149	Substitution - Missense	COSM10912	26	0.0728781	NA	Uncertain significance​	NA	NA	NA	NA	NA	0	0	0	0	0	0
TP53	c.700T>A	p.Y234N	7674263	Substitution - Missense	COSM43956	26	0.0728781	Pathogenic	Likely pathogenic​	NA	NA	NA	NA	NA	0	0	0	0	0	0
TP53	c.843C>G	p.D281E	7673777	Substitution - Missense	COSM43837	26	0.0728781	Uncertain significance​	Uncertain significance​	NA	NA	NA	NA	NA	0	0	0	0	0	0
TP53	c.472C>T	p.R158C	7675140	Substitution - Missense	COSM43848	26	0.0728781	Conflicting interpretations of pathogenicity​ Likely pathogenic(2); Uncertain significance(6)	Uncertain significance​	NA	NA	NA	7e-06	7e-06	0	1	0	1	1	1
TP53	c.706T>A	p.Y236N	7674257	Substitution - Missense	COSM43826	26	0.0728781	Uncertain significance​	Uncertain significance​	NA	NA	NA	NA	NA	0	0	0	0	0	0
TP53	c.659A>C	p.Y220S	7674872	Substitution - Missense	COSM43850	26	0.0728781	Pathogenic​	Likely pathogenic​	NA	NA	NA	NA	NA	0	0	0	0	0	0
TP53	c.845G>C	p.R282P	7673775	Substitution - Missense	COSM44306	26	0.0728781	Pathogenic/Likely pathogenic​	Likely pathogenic​	NA	NA	NA	NA	NA	0	0	0	0	0	0
TP53	c.623A>T	p.D208V	7674908	Substitution - Missense	COSM44249	26	0.0728781	Uncertain significance​	Uncertain significance​	NA	NA	NA	NA	NA	0	0	0	0	0	0
TP53	c.434T>A	p.L145Q	7675178	Substitution - Missense	COSM44137	25	0.0700751	Pathogenic/Likely pathogenic​	Uncertain significance​	NA	NA	NA	NA	NA	0	0	0	0	1	0
TP53	c.412G>C	p.A138P	7675200	Substitution - Missense	COSM11188	25	0.0700751	Pathogenic/Likely pathogenic​	Likely pathogenic​	NA	NA	NA	NA	NA	0	6	0	1	1	1
TP53	c.421T>C	p.C141R	7675191	Substitution - Missense	COSM43901	25	0.0700751	Conflicting interpretations of pathogenicity​ Likely pathogenic(1); Uncertain significance(1)	Likely pathogenic​	NA	NA	NA	NA	NA	0	0	0	0	0	0
TP53	c.731G>T	p.G244V	7674232	Substitution - Missense	COSM43652	25	0.0700751	Likely pathogenic​	Likely pathogenic​	NA	NA	NA	NA	NA	0	8	0	1	1	1
TP53	c.537T>A	p.H179Q	7675075	Substitution - Missense	COSM44214	25	0.0700751	Pathogenic​	Uncertain significance​	NA	NA	NA	NA	NA	0	0	0	0	0	0
TP53	c.542G>C	p.R181P	7675070	Substitution - Missense	COSM45046	25	0.0700751	Pathogenic/Likely pathogenic	Likely pathogenic​	NA	NA	NA	NA	NA	0	0	0	0	0	0
TP53	c.733G>C	p.G245R	7674230	Substitution - Missense	COSM10957	25	0.0700751	Conflicting interpretations of pathogenicity​ Pathogenic(1); Uncertain significance(1)	Likely pathogenic​	NA	NA	NA	NA	NA	0	0	0	0	0	0
TP53	c.857A>G	p.E286G	7673763	Substitution - Missense	COSM43565	25	0.0700751	Uncertain significance​	Likely pathogenic​	NA	NA	NA	NA	NA	0	0	0	0	0	0
TP53	c.613T>G	p.Y205D	7674918	Substitution - Missense	COSM43844	25	0.0700751	Conflicting interpretations of pathogenicity​ Pathogenic(1); Likely pathogenic(1); Uncertain significance(1)	Uncertain significance​	NA	NA	NA	7e-06	7e-06	0	1	0	1	1	1
TP53	c.808T>C	p.F270L	7673812	Substitution - Missense	COSM44262	25	0.0700751	Conflicting interpretations of pathogenicity​ Pathogenic(1); Uncertain significance(1)	Likely pathogenic​	NA	NA	NA	NA	NA	0	1	0	1	1	1
TP53	c.490A>G	p.K164E	7675122	Substitution - Missense	COSM10762	25	0.0700751	Uncertain significance​	Uncertain significance​	NA	NA	NA	NA	NA	0	0	0	0	0	0
TP53	c.718A>G	p.S240G	7674245	Substitution - Missense	COSM43973	25	0.0700751	Pathogenic/Likely pathogenic​	Likely pathogenic​	NA	NA	NA	NA	NA	0	0	0	0	0	0
TP53	c.823T>C	p.C275R	7673797	Substitution - Missense	COSM43902	25	0.0700751	Conflicting interpretations of pathogenicity​ Likely pathogenic(1); Uncertain significance(1)	Likely pathogenic​	NA	NA	NA	NA	NA	0	0	0	0	0	0
TP53	c.854A>T	p.E285V	7673766	Substitution - Missense	COSM44227	25	0.0700751	Pathogenic	Likely pathogenic​	NA	NA	NA	NA	NA	0	0	0	0	0	0
TP53	c.809T>C	p.F270S	7673811	Substitution - Missense	COSM11305	24	0.0672721	Pathogenic/Likely pathogenic​	Likely pathogenic​	NA	NA	NA	NA	NA	0	0	0	0	0	0
TP53	c.645T>G	p.S215R	7674886	Substitution - Missense	COSM44979	24	0.0672721	Conflicting interpretations of pathogenicity​ Pathogenic(1); Likely pathogenic(1); Uncertain significance(3)	Uncertain significance​	NA	NA	NA	NA	NA	0	0	0	0	0	0
TP53	c.841G>T	p.D281Y	7673779	Substitution - Missense	COSM11516	24	0.0672721	Pathogenic​	Likely pathogenic​	NA	NA	NA	NA	NA	0	0	0	0	0	0
TP53	c.423C>G	p.C141W	7675189	Substitution - Missense	COSM44204	24	0.0672721	Conflicting interpretations of pathogenicity​ Likely pathogenic(1); Uncertain significance(1)	Uncertain significance​	NA	NA	NA	NA	NA	0	0	0	0	0	0
TP53	c.451C>A	p.P151T	7675161	Substitution - Missense	COSM43911	24	0.0672721	Pathogenic/Likely pathogenic​	Likely pathogenic​	NA	NA	NA	NA	NA	0	0	0	0	0	0
TP53	c.497C>G	p.S166X	7675115	Substitution - Nonsense	COSM44467	24	0.0672721	Pathogenic​	Pathogenic​	NA	NA	NA	NA	NA	0	0	0	0	0	0
TP53	c.434T>C	p.L145P	7675178	Substitution - Missense	COSM43899	23	0.0644691	Conflicting interpretations of pathogenicity​ Likely pathogenic(1); Uncertain significance(1)	Uncertain significance​	NA	NA	NA	NA	NA	0	0	0	0	0	0
TP53	c.559G>A	p.G187S	7675053	Substitution - Missense	COSM44026	23	0.0644691	Uncertain significance​	Uncertain significance​	NA	NA	NA	7e-06	7e-06	0	0	0	0	0	0
TP53	c.847C>T	p.R283C	7673773	Substitution - Missense	COSM10911	23	0.0644691	Likely benign	Uncertain significance​	NA	NA	NA	8.5e-05	8.5e-05	0	0	0	0	0	0
TP53	c.328C>T	p.R110C	7676041	Substitution - Missense	COSM43682	23	0.0644691	Uncertain significance​	Uncertain significance​	NA	NA	NA	1.3e-05	1.3e-05	0	1	2	1	1	1
TP53	c.596G>A	p.G199E	7674935	Substitution - Missense	COSM43989	23	0.0644691	Uncertain significance​	Likely pathogenic​	NA	NA	NA	NA	NA	0	0	0	0	0	0
TP53	c.830G>A	p.C277Y	7673790	Substitution - Missense	COSM43737	23	0.0644691	Conflicting interpretations of pathogenicity​ Likely pathogenic(3); Uncertain significance(1)	Uncertain significance​	NA	NA	NA	NA	NA	0	0	0	0	0	0
TP53	c.842A>G	p.D281G	7673778	Substitution - Missense	COSM11232	23	0.0644691	Pathogenic​	Likely pathogenic​	NA	NA	NA	NA	NA	0	0	0	0	0	0
TP53	c.712T>C	p.C238R	7674251	Substitution - Missense	COSM44321	23	0.0644691	Pathogenic​	Uncertain significance​	NA	NA	NA	NA	NA	0	0	0	0	0	0
TP53	c.661G>T	p.E221X	7674870	Substitution - Nonsense	COSM44817	22	0.0616661	Pathogenic​	Pathogenic​	NA	NA	NA	NA	NA	0	1	0	1	1	1
TP53	c.388C>T	p.L130F	7675224	Substitution - Missense	COSM11449	22	0.0616661	Conflicting interpretations of pathogenicity​ Pathogenic(1); Uncertain significance(4)	Uncertain significance​	NA	NA	NA	NA	NA	0	1	0	1	1	1
TP53	c.796G>C	p.G266R	7673824	Substitution - Missense	COSM11205	22	0.0616661	NA	Uncertain significance​	NA	NA	NA	NA	NA	0	6	0	1	1	1
TP53	c.809T>G	p.F270C	7673811	Substitution - Missense	COSM43621	22	0.0616661	Conflicting interpretations of pathogenicity​ Likely pathogenic(2); Uncertain significance(1)	Likely pathogenic​	NA	NA	NA	NA	NA	0	1	0	1	1	1
TP53	c.658T>C	p.Y220H	7674873	Substitution - Missense	COSM44637	22	0.0616661	Pathogenic	Likely pathogenic​	NA	NA	NA	7e-06	7e-06	0	0	0	0	0	0
TP53	c.840A>T	p.R280S	7673780	Substitution - Missense	COSM44171	22	0.0616661	Pathogenic	Likely pathogenic​	NA	NA	NA	7e-06	7e-06	0	0	0	0	1	0
TP53	c.472C>G	p.R158G	7675140	Substitution - Missense	COSM11087	22	0.0616661	Pathogenic	Likely pathogenic​	NA	NA	NA	NA	NA	0	0	0	0	0	0
TP53	c.833C>A	p.P278H	7673787	Substitution - Missense	COSM43755	22	0.0616661	Uncertain significance​	Uncertain significance​	NA	NA	NA	NA	NA	0	0	0	0	0	0
TP53	c.755T>C	p.L252P	7674208	Substitution - Missense	COSM44769	21	0.0588631	Conflicting interpretations of pathogenicity​ Pathogenic(1); Uncertain significance(1)	Uncertain significance​	NA	NA	NA	NA	NA	0	0	0	0	0	0
TP53	c.395A>T	p.K132M	7675217	Substitution - Missense	COSM43592	21	0.0588631	Uncertain significance​	Likely pathogenic​	NA	NA	NA	NA	NA	0	0	0	0	0	0
TP53	c.470T>G	p.V157G	7675142	Substitution - Missense	COSM43903	21	0.0588631	Uncertain significance​	Likely pathogenic​	NA	NA	NA	NA	NA	0	0	0	0	0	0
TP53	c.530C>G	p.P177R	7675082	Substitution - Missense	COSM10651	21	0.0588631	Pathogenic/Likely pathogenic​	Likely pathogenic​	NA	NA	NA	NA	NA	0	0	0	0	0	0
TP53	c.518T>C	p.V173A	7675094	Substitution - Missense	COSM44327	20	0.0560601	Pathogenic/Likely pathogenic​	Likely pathogenic​	NA	NA	NA	NA	NA	0	0	0	0	0	0
TP53	c.578A>C	p.H193P	7674953	Substitution - Missense	COSM43833	20	0.0560601	Pathogenic	Likely pathogenic​	NA	NA	NA	7e-06	7e-06	0	0	5	0	1	1
TP53	c.632C>T	p.T211I	7674899	Substitution - Missense	COSM43939	20	0.0560601	Uncertain significance​	Uncertain significance​	NA	NA	NA	NA	NA	0	0	0	0	0	0
VHL	c.481C>T	p.R161X	10149804	Substitution - Nonsense	COSM17612	40	2.1978	Pathogenic​	Uncertain significance​	NA	NA	NA	NA	NA	0	0	0	0	1	0
VHL	c.266T>A	p.L89H	10142113	Substitution - Missense	COSM14305	34	1.86813	Likely pathogenic​	Likely pathogenic​	NA	NA	NA	NA	NA	0	0	0	0	1	0
VHL	c.194C>A	p.S65X	10142041	Substitution - Nonsense	COSM18015	27	1.48352	Pathogenic​	Pathogenic	NA	NA	NA	NA	NA	0	0	0	0	1	0
VHL	c.203C>A	p.S68X	10142050	Substitution - Nonsense	COSM14372	27	1.48352	Pathogenic	Pathogenic	NA	NA	NA	NA	NA	0	0	0	0	1	0
VHL	c.472C>G	p.L158V	10149795	Substitution - Missense	COSM17657	26	1.42857	NA	Likely pathogenic​	NA	NA	NA	NA	NA	0	0	0	0	1	0
VHL	c.194C>T	p.S65L	10142041	Substitution - Missense	COSM14400	25	1.37363	Pathogenic	Likely pathogenic​	NA	NA	NA	NA	NA	0	0	0	0	1	0
VHL	c.484T>C	p.C162R	10149807	Substitution - Missense	COSM18073	20	1.0989	NA	Likely pathogenic​	NA	NA	NA	NA	NA	0	0	0	0	0	0
VHL	c.241C>T	p.P81S	10142088	Substitution - Missense	COSM17721	19	1.04396	Conflicting interpretations of pathogenicity​ Likely pathogenic(1); Uncertain significance(10); Benign(1); Likely benign(6)	Uncertain significance​	NA	NA	NA	0.000348	0.000348	0	0	0	0	0	0
VHL	c.343C>A	p.H115N	10146516	Substitution - Missense	COSM17752	19	1.04396	NA	Uncertain significance​	NA	NA	NA	NA	NA	0	0	0	0	1	0
VHL	c.343C>T	p.H115Y	10146516	Substitution - Missense	COSM14375	19	1.04396	NA	Uncertain significance​	NA	NA	NA	NA	NA	0	0	0	0	1	0
VHL	c.506T>C	p.L169P	10149829	Substitution - Missense	COSM17837	19	1.04396	Likely pathogenic​	Likely pathogenic​	NA	NA	NA	NA	NA	0	0	0	0	1	0
VHL	c.388G>C	p.V130L	10146561	Substitution - Missense	COSM14407	18	0.989011	NA	Likely pathogenic​	NA	NA	NA	NA	NA	0	0	0	0	0	0
VHL	c.240T>A	p.S80R	10142087	Substitution - Missense	COSM14290	17	0.934066	Likely benign​	Uncertain significance​	NA	NA	NA	NA	NA	0	0	0	0	0	0
VHL	c.233A>G	p.N78S	10142080	Substitution - Missense	COSM17855	16	0.879121	Pathogenic​	Likely pathogenic​	NA	NA	NA	NA	NA	0	0	0	0	0	0
VHL	c.239G>A	p.S80N	10142086	Substitution - Missense	COSM30216	16	0.879121	Pathogenic​	Likely pathogenic​	NA	NA	NA	NA	NA	0	0	0	0	0	0
VHL	c.221T>A	p.V74D	10142068	Substitution - Missense	COSM17715	15	0.824176	Conflicting interpretations of pathogenicity​ Likely pathogenic(1); Uncertain significance(1)	Uncertain significance​	NA	NA	NA	NA	NA	0	10	0	1	1	1
VHL	c.263G>A	p.W88X	10142110	Substitution - Nonsense	COSM18070	15	0.824176	NA	Pathogenic​	NA	NA	NA	NA	NA	0	0	0	0	0	0
VHL	c.286C>T	p.Q96X	10142133	Substitution - Nonsense	COSM17658	15	0.824176	Pathogenic​	Pathogenic​	NA	NA	NA	NA	NA	0	0	0	0	0	0
VHL	c.217C>T	p.Q73X	10142064	Substitution - Nonsense	COSM17872	14	0.769231	Pathogenic​	Pathogenic​	NA	NA	NA	NA	NA	0	0	0	0	0	0
VHL	c.499C>T	p.R167W	10149822	Substitution - Missense	COSM14311	14	0.769231	NA	Pathogenic​	NA	NA	NA	7e-06	7e-06	0	0	0	0	0	0
VHL	c.263G>T	p.W88L	10142110	Substitution - Missense	COSM18351	13	0.714286	Uncertain significance​	Likely pathogenic​	NA	NA	NA	NA	NA	0	0	0	0	0	0
VHL	c.353T>C	p.L118P	10146526	Substitution - Missense	COSM14312	13	0.714286	Pathogenic​	Likely pathogenic​	NA	NA	NA	NA	NA	0	0	0	0	0	0
VHL	c.361G>T	p.D121Y	10146534	Substitution - Missense	COSM34019	13	0.714286	NA	Uncertain significance​	NA	NA	NA	NA	NA	0	0	0	0	0	0
VHL	c.208G>T	p.E70X	10142055	Substitution - Nonsense	COSM17711	12	0.659341	Pathogenic	Pathogenic​	NA	NA	NA	NA	NA	0	0	0	0	0	0
VHL	c.266T>C	p.L89P	10142113	Substitution - Missense	COSM14346	12	0.659341	Pathogenic/Likely pathogenic​	Likely pathogenic​	NA	NA	NA	NA	NA	0	0	0	0	0	0
VHL	c.269A>T	p.N90I	10142116	Substitution - Missense	COSM14390	12	0.659341	Likely pathogenic​	Likely pathogenic​	NA	NA	NA	NA	NA	0	0	0	0	0	0
VHL	c.332G>A	p.S111N	10142179	Substitution - Missense	COSM26151	12	0.659341	Pathogenic​	Likely pathogenic​	NA	NA	NA	NA	NA	0	0	0	0	0	0
VHL	c.333C>A	p.S111R	10142180	Substitution - Missense	COSM30226	12	0.659341	NA	Likely pathogenic​	NA	NA	NA	NA	NA	0	0	0	0	0	0
VHL	c.452T>C	p.I151T	10146625	Substitution - Missense	COSM17934	12	0.659341	Pathogenic​	Likely pathogenic​	NA	NA	NA	NA	NA	0	0	0	0	0	0
VHL	c.458T>C	p.L153P	10146631	Substitution - Missense	COSM14363	12	0.659341	NA	Uncertain significance​	NA	NA	NA	NA	NA	0	0	0	0	0	0
VHL	c.525C>A	p.Y175X	10149848	Substitution - Nonsense	COSM17789	12	0.659341	NA	Uncertain significance​	NA	NA	NA	NA	NA	0	0	0	0	0	0
VHL	c.256C>T	p.P86S	10142103	Substitution - Missense	COSM18350	11	0.604396	Pathogenic/Likely pathogenic​	Pathogenic​	NA	NA	NA	NA	NA	0	0	0	0	0	0
VHL	c.383T>C	p.L128P	10146556	Substitution - Missense	COSM25719	11	0.604396	NA	Uncertain significance​	NA	NA	NA	NA	NA	0	0	0	0	0	0
VHL	c.473T>A	p.L158Q	10149796	Substitution - Missense	COSM14368	11	0.604396	Likely pathogenic​	Likely pathogenic​	NA	NA	NA	NA	NA	0	0	0	0	0	0
VHL	c.473T>C	p.L158P	10149796	Substitution - Missense	COSM14387	11	0.604396	Pathogenic	Likely pathogenic​	NA	NA	NA	NA	NA	0	0	0	0	0	0
VHL	c.490C>T	p.Q164X	10149813	Substitution - Nonsense	COSM14397	11	0.604396	NA	Uncertain significance​	NA	NA	NA	NA	NA	0	0	0	0	0	0
VHL	c.551T>C	p.L184P	10149874	Substitution - Missense	COSM17854	11	0.604396	Pathogenic/Likely pathogenic	Likely pathogenic​	NA	NA	NA	NA	NA	0	0	0	0	0	0
VHL	c.341G>C	p.G114A	10146514	Substitution - Missense	COSM18346	10	0.549451	NA	Uncertain significance​	NA	NA	NA	NA	NA	0	0	0	0	0	0
VHL	c.350G>A	p.W117X	10146523	Substitution - Nonsense	COSM17862	10	0.549451	Pathogenic​	Pathogenic​	NA	NA	NA	NA	NA	0	0	0	0	0	0
WT1	c.1107A>G	p.R369=	32396399	Substitution - coding silent	COSM1353507	109	10.283	NA	Benign	NA	NA	NA	NA	NA	0	0	0	0	0	0
WT1	c.594C>T	p.N198=	32434752	Substitution - coding silent	COSM5020955	73	6.88679	NA	Benign	NA	NA	NA	NA	NA	0	0	0	0	0	0
WT1	c.1142C>A	p.S381X	32396364	Substitution - Nonsense	COSM27307	38	3.58491	NA	Pathogenic	NA	NA	NA	NA	NA	0	0	0	0	0	0
WT1	c.1384C>T	p.R462W	32392020	Substitution - Missense	COSM21417	24	2.26415	NA	Uncertain significance​	NA	NA	NA	NA	NA	0	0	0	0	0	0
WT1	c.1372C>T	p.R458X	32392032	Substitution - Nonsense	COSM21397	23	2.16981	NA	Pathogenic	NA	NA	NA	NA	NA	0	0	0	0	0	0
WT1	c.1105C>T	p.R369X	32396401	Substitution - Nonsense	COSM21441	20	1.88679	Pathogenic​	Pathogenic	NA	NA	NA	NA	NA	0	0	0	0	0	0
WT1	c.1385G>A	p.R462Q	32392019	Substitution - Missense	COSM21434	17	1.60377	NA	Uncertain significance​	NA	NA	NA	NA	NA	0	0	0	0	0	0
XPO1	c.1711G>A	p.E571K	61492337	Substitution - Missense	COSM96797	94	14.6646	Likely pathogenic​	Likely pathogenic​	NA	NA	NA	NA	NA	0	11	1	1	1	1
XPO1	c.2246G>A	p.R749Q	61488232	Substitution - Missense	COSM286575	15	2.34009	NA	Likely pathogenic​	NA	NA	NA	NA	NA	0	0	0	0	0	0

## Sheet: Dataset S2
Dataset S2. Analyzed TGCA cases and references
Study ID	Cancer type	Seaquenced Cases	References
LAML	Acute Myeloid Leukemia	144	Cancer Genome Atlas Research Network. Genomic and epigenomic landscapes of adult de novo acute myeloid leukemia. N Engl J Med 368, 2059–2074 (2013). https://doi.org/10.1056/NEJMoa1301689
ACC	Adrenocortical Carcinoma	92	Cancer Genome Atlas Research Network. Integrated genomic characterization of adrenocortical carcinoma. Cancer Cell 29, 605–619 (2016). https://doi.org/10.1016/j.ccell.2016.04.002
BLCA	Bladder Urothelial Carcinoma	412	Cancer Genome Atlas Research Network. Comprehensive molecular characterization of urothelial bladder carcinoma. Nature 507, 315–322 (2014). https://doi.org/10.1038/nature12965
			Cancer Genome Atlas Research Network. Comprehensive molecular characterization of muscle‑invasive bladder cancer. Cell 171(3), 540–556.e25 (2017). doi:10.1016/j.cell.2017.09.007
BRCA	Breast Ductal Carcinoma	986	Cancer Genome Atlas Research Network. Comprehensive molecular portraits of human breast tumours. Nature 490, 61–70 (2012). https://doi.org/10.1038/nature11412
	Breast Lobular Carcinoma		Cancer Genome Atlas Research Network. Comprehensive molecular portraits of invasive lobular breast carcinoma. Cell 163(2), 506–519 (2015). https://doi.org/10.1016/j.cell.2015.09.033
CESC	Cervical Carcinoma	289	Cancer Genome Atlas Research Network. Integrated genomic and molecular characterization of cervical cancer. Nature 543, 378–384 (2017). https://doi.org/10.1038/nature21386
CHOL	Cholangiocarcinoma	51	Cancer Genome Atlas Research Network. Integrated genomic characterization of cholangiocarcinoma. Cell Rep 19, 2866–2879 (2017). https://doi.org/10.1016/j.celrep.2017.12.014
COAD, READ	Colorectal Adenocarcinoma	536	Cancer Genome Atlas Research Network. Comprehensive molecular characterization of human colon and rectal cancer. Nature 487, 330–337 (2012). https://doi.org/10.1038/nature11252
ESCA	Esophageal Carcinoma	184	Cancer Genome Atlas Research Network. Integrated genomic characterization of oesophageal carcinoma. Nature 541, 169–175 (2017). https://doi.org/10.1038/nature20805
STAD	Gastric Adenocarcinoma	437	Cancer Genome Atlas Research Network. Comprehensive molecular characterization of gastric adenocarcinoma. Nature 513, 202–209 (2014). https://doi.org/10.1038/nature13480
GBM	Glioblastoma Multiforme	393	Cancer Genome Atlas Research Network. Comprehensive genomic characterization defines human glioblastoma genes and core pathways. Nature 455(7216), 1061–1068 (2008). doi:10.1038/nature07385
			Cancer Genome Atlas Research Network. The somatic genomic landscape of glioblastoma. Cell 155(4), 462–477 (2013). doi:10.1016/j.cell.2013.09.034
HNSC	Head and Neck Squamous Cell Carcinoma	508	Cancer Genome Atlas Research Network. Comprehensive genomic characterization of head and neck squamous cell carcinomas. Nature 517, 576–582 (2015). https://doi.org/10.1038/nature14129
LIHC	Hepatocellular Carcinoma	364	Cancer Genome Atlas Research Network. Comprehensive and integrative genomic characterization of hepatocellular carcinoma. Cell 169, 1327–1341.e23 (2017). https://doi.org/10.1016/j.cell.2017.05.046
KICH	Kidney Chromophobe Carcinoma	66	Cancer Genome Atlas Research Network. Comprehensive molecular characterization of chromophobe renal cell carcinoma. Cancer Cell 26, 319–329 (2014). https://doi.org/10.1016/j.ccr.2014.07.014
KIRC	Kidney Clear Cell Carcinoma	336	Cancer Genome Atlas Research Network. Comprehensive molecular characterization of clear cell renal cell carcinoma. Nature 499, 43–49 (2013). https://doi.org/10.1038/nature12222
KIRP	Kidney Papillary Cell Carcinoma	281	Cancer Genome Atlas Research Network. Comprehensive molecular characterization of papillary renal-cell carcinoma. N Engl J Med 374, 135–145 (2016). https://doi.org/10.1056/NEJMoa1505917
LGG	Lower Grade Glioma	509	Cancer Genome Atlas Research Network. Comprehensive, integrative genomic analysis of diffuse lower-grade gliomas. N Engl J Med 372, 2481–2498 (2015). https://doi.org/10.1056/NEJMoa1402121
LUAD	Lung Adenocarcinoma	567	Cancer Genome Atlas Research Network. Comprehensive molecular profiling of lung adenocarcinoma. Nature 511, 543–550 (2014). https://doi.org/10.1038/nature13385
			Cancer Genome Atlas Research Network. Comprehensive genomic characterization of lung adenocarcinoma. Nature Genetics 48(12), 1613–1626 (2016). doi:10.1038/ng.3708
LUSC	Lung Squamous Cell Carcinoma	492	Cancer Genome Atlas Research Network. Comprehensive genomic characterization of squamous cell lung cancers. Nature 489, 519–525 (2012). https://doi.org/10.1038/nature11404
			Cancer Genome Atlas Research Network. Distinct patterns of somatic genome alterations in lung adenocarcinomas and squamous cell carcinomas. Nature Genetics 48(12), 1107–1112 (2016). doi:10.1038/ng.3706
MESO	Mesothelioma	82	Cancer Genome Atlas Research Network. Comprehensive genomic analysis of malignant pleural mesothelioma. Cancer Discov 8, 1548–1568 (2018). https://doi.org/10.1158/2159-8290.CD-18-0059
OV	Ovarian Serous Adenocarcinoma	436	Cancer Genome Atlas Research Network. Integrated genomic analyses of ovarian carcinoma. Nature 474, 609–615 (2011). https://doi.org/10.1038/nature10166
PAAD	Pancreatic Ductal Adenocarcinoma	180	Cancer Genome Atlas Research Network. Integrated genomic characterization of pancreatic ductal adenocarcinoma. Cancer Cell 32, 185–203.e13 (2017). https://doi.org/10.1016/j.ccell.2017.07.007
PCPG	Paraganglioma & Pheochromocytoma	179	Cancer Genome Atlas Research Network. Comprehensive molecular characterization of pheochromocytoma and paraganglioma. Cancer Cell 31, 181–193 (2017). https://doi.org/10.1016/j.ccell.2017.01.001
PRAD	Prostate Adenocarcinoma	496	Cancer Genome Atlas Research Network. The molecular taxonomy of primary prostate cancer. Cell 163, 1011–1025 (2015). https://doi.org/10.1016/j.cell.2015.10.025
SARC	Sarcoma	237	Cancer Genome Atlas Research Network. Comprehensive and integrated genomic characterization of adult soft tissue sarcomas. Cell 171, 950–965.e28 (2017). https://doi.org/10.1016/j.cell.2017.09.041
SKCM	Skin Cutaneous Melanoma	468	Cancer Genome Atlas Research Network. Genomic classification of cutaneous melanoma. Cell 161, 1681–1696 (2015). https://doi.org/10.1016/j.cell.2015.05.044
TGCT	Testicular Germ Cell Cancer	145	Cancer Genome Atlas Research Network. Integrated molecular characterization of testicular germ cell tumors. Cell Rep 23, 3392–3406.e5 (2018). https://doi.org/10.1016/j.celrep.2018.05.020
THYM	Thymoma	123	Cancer Genome Atlas Research Network. Comprehensive molecular characterization of thymic epithelial tumors. Cancer Cell 33, 244–258.e10 (2018). https://doi.org/10.1016/j.ccell.2018.01.003
THCA	Thyroid Papillary Carcinoma	492	Cancer Genome Atlas Research Network. Integrated genomic characterization of papillary thyroid carcinoma. Cell 159, 676–690 (2014). https://doi.org/10.1016/j.cell.2014.09.050
UCS	Uterine Carcinosarcoma	57	Cancer Genome Atlas Research Network. Integrated genomic characterization of uterine carcinosarcoma. Cancer Cell 31, 411–423 (2017). https://doi.org/10.1016/j.ccell.2017.03.010
UCEC	Uterine Corpus Endometrioid Carcinoma	530	Cancer Genome Atlas Research Network. Integrated genomic characterization of endometrial carcinoma. Nature 497, 67–73 (2013). https://doi.org/10.1038/nature12113
UVM	Uveal Melanoma	80	Cancer Genome Atlas Research Network. Genomic classification of uveal melanoma. Cancer Cell 32, 204–220.e15 (2017). https://doi.org/10.1016/j.ccell.2017.06.004

## Sheet: Dataset S3
Dataset S3. Frequently mutated genes by organ type selected based on top-100 ranking
Biliary tract	Breast	Central nervons system	Cervix	Endometrium	Haematopoietic and lymphoid tissue	Kidney	Large intestine	Liver	Lung	Oesophagus	Ovary	Pancreas	Prostate	Skin	Soft tissue	Stomach	Thyroid	Urinary tract
KRAS	PIK3CA	IDH1	PIK3CA	PTEN	JAK2	VHL	KRAS	CNTNAP2	EGFR	LRP1B	TP53	KRAS	CSMD1	BRAF	KIT	TTN	BRAF	FGFR3
RBFOX1	TP53	TP53	TTN	TTN	FLT3	PBRM1	BRAF	EYS	KRAS	CNTNAP2	CNTNAP2	CNTNAP2	EYS	TTN	MED12	TP53	MUC4	TP53
TP53	CNTNAP2	PTEN	MUC4	PIK3CA	NPM1	CNTNAP2	APC	PTPRD	TP53	CSMD1	DLG2	RBFOX1	ROBO2	MUC16	CTNNB1	PCDHGA1	RET	TTN
CSMD1	RBFOX1	H3F3A	KRAS	PCDHGA1	MUC4	CSMD3	TP53	RBFOX1	TTN	TP53	CSMD1	LRP1B	PTPRD	PCDHA1	ERG	LRP1B	NRAS	PIK3CA
LRP1B	CSMD1	BRAF	PCDHA1	PCDHGA2	TET2	CSMD1	TTN	CSMD3	MUC16	EYS	EYS	EYS	RBFOX1	PCDHA2	PDGFRA	PCDHA1	MUC6	ARID1A
CNTNAP2	DMD	EGFR	PCDHA2	PCDHGA3	CALR	RBFOX1	PIK3CA	LRP1B	PCDHGA1	RBFOX1	CSMD3	CSMD1	CSMD3	PCDHA3	ABL1	PCDHGA2	ZNF717	KDM6A
DMD	CSMD3	ATRX	TP53	PCDHA1	DNMT3A	LRP1B	PCDHA1	ROBO2	PCDHGA2	DLG2	KRAS	DLG2	LRP1B	PCDHGA1	ETV6	PCDHA2	TP53	KMT2D
PTPRD	EYS	MUC4	PCDHGA1	PCDHGB1	ROBO2	CDH18	PCDHGA1	CSMD1	PCDHA1	CSMD3	ROBO2	NRXN3	CNTNAP2	PCDHA4	TP53	CSMD1	HRAS	PCDHA1
NRXN3	PTPRD	TTN	HSPA1L	PCDHA2	IGLL5	EYS	PCDHGA2	CDH18	CSMD3	SGCZ	CTNNA3	CDH18	GRID2	PCDHGA2	BCR	PCDHGA3	NBPF20	MUC4
DLG2	IL1RAPL1	PIK3CA	PCDHGA2	PCDHA3	FHIT	SETD2	PCDHA2	CCSER1	PCDHGA3	CDH18	PTPRD	ROBO2	CTNNA3	PCDHA5	HLA-A	PCDHA3	MUC3A	PCDHA2
NRXN1	LRP1B	NF1	PCDHA3	PCDHGA4	CSMD1	CDH12	PCDHGA3	NRXN3	RYR2	CNTN5	RBFOX1	CNTN5	CNTN5	PCDHGA3	EGFR	PCDHGB1	TSHR	RB1
EYS	GPC5	CIC	KMT2D	PCDHGB2	TP53	TP53	PCDHA3	CDH12	PCDHA2	ROBO2	LRP1B	SGCZ	SGCZ	CSMD1	AC058822.1	PCDHGA4	CDC27	PCDHA3
ROBO2	ROBO2	PCDHA1	PCDHGA3	PCDHA4	BCL2	ROBO2	PCDHGB1	DCC	LRP1B	NRG3	FOXL2	CSMD3	PCDH15	NRAS	JAK2	PCDHA4	NBPF10	STAG2
AUTS2	MACROD2	CNTNAP2	PCDHA4	PCDHGA5	CNTNAP2	GPC5	PCDHA4	ERBB4	PCDHGB1	GPC6	CDH18	CTNNA2	GALNTL6	PCDHA6	NF1	PCDHGB2	MUC12	KMT2C
ERBB4	CTNNA3	MUC16	PCDHA5	TP53	NOTCH1	DMD	PCDHGA4	NRG3	PCDHA3	NRXN3	DMD	ERBB4	MDGA2	PCDHGB1	PIK3CA	CSMD3	PCDHA1	HRAS
CSMD3	DLG2	PCDHGA1	PCDHGB1	PCDHA5	LRP1B	SGCZ	PCDHGB2	CTNNA2	PCDHGA4	GPC5	AGBL4	CTNNA3	MACROD2	LRP1B	NF2	PCDHA5	RPH3AL	MUC16
CTNNA2	CTNNA2	DMD	MUC16	PCDHGB3	NRAS	GRID2	PCDHA5	KCNIP4	USH2A	PTPRT	MACROD2	NRXN1	TP53	DNAH5	KMT2C	PCDHGA5	ANKRD36C	PCDHA4
MACROD2	MAGI2	PCDHA2	KMT2C	ARID1A	EYS	PTPRD	PCDHGA5	GALNTL6	PCDHA4	CTNNA2	PTPRN2	DMD	PRKG1	PCDHGA4	NOTCH4	PCDHA6	KRAS	PCDHGA1
ZFHX3	TMEM132D	EYS	PCDHA6	KRAS	CSMD3	ERBB4	PCDHA6	AGBL4	PCDHGB2	PCDH15	MAGI2	PCDH15	DLG2	PCDHA7	HLA-B	PCDHGB3	MICAL3	ERBB2
CTNNA3	AF241726.2	PCDHGA2	PCDHGA4	PCDHA6	MYC	TTN	PCDHGB3	SGCZ	PCDHGA5	CTNNA3	SNTG1	PTPRD	DCC	PCDHGB2	MUC4	SYNE1	PCDHA2	PCDHA5
GRID2	PRKN	CTNNB1	PCDHGB2	PCDHGA6	ASXL1	CTNNA2	MUC16	NRXN1	PCDHA5	NRXN1	CNTN5	CDH13	ERBB4	CSMD3	BRAF	MUC16	NBPF1	PCDHGA2
TTN	RYR2	PCDHA3	PTEN	PCDHGA7	KIT	CTNNB1	PCDHA7	GRID2	PCDHGB3	PCDH9	NRXN3	CNTNAP5	CTNNA2	PCDHA8	RAF1	PCDHA7	TSPEAR	PCDHA6
WWOX	SNTG1	PCDHGA3	TSPEAR	PCDHA7	GRID2	CTNNA3	PCDHGA6	PCDH15	ZFHX4	ERBB4	NRXN1	GRID2	DPP10	TP53	ROS1	PCDHGA6	PCDHA3	PCDHGA3
MAGI2	DCC	AC058822.1	PCDHA7	PCDHGB4	MYD88	PCDH15	SYNE1	CNTN5	PCDHA6	PTPRD	PRKG1	TP53	CDH12	PCDHGA5	LRP1B	EYS	PIK3CA	CREBBP
RYR2	NRXN3	PCDHGB1	PCDHGA5	LRP1B	CCSER1	NRXN3	PCDHA8	EPHA6	PCDHGA6	SNTG1	CNTNAP5	MAGI2	SNTG1	PCLO	RET	PCDHA8	PCDHA4	PCDHA7
NAALADL2	KCNIP4	LRP1B	ERBB2	PCDHA8	DMD	MACROD2	PCDHGA7	DMD	FLG	MAGI2	PIK3CA	AGBL4	CNTNAP5	PCDHGB3	AL132671.2	CNTNAP2	AHNAK2	NF1
GPC6	PTPRN2	IDH2	FBXW7	CSMD3	ROBO1	DLG2	PCDHGB4	CNTNAP5	PIK3CA	CNTNAP5	IL1RAPL1	CDH12	NELL1	PCDHA9	ETV1	PCDHGA7	GOLGA6L2	PCDHGB1
DLGAP2	CDH12	PCDHGA4	PCDHA8	CSMD1	IMMP2L	BAP1	PCDHA9	NEGR1	PCDHGA7	CDH12	PCDH15	GPC6	MAGI2	PCDHGA6	TMPRSS2	PCDHGB4	MUC5B	CNTNAP2
NRG3	DPP6	CSMD1	PCDHGB3	CTNNB1	CNTN5	GALNTL6	OBSCN	DLG2	SYNE1	NKAIN2	GPC5	PCDH9	NRG3	ADGRV1	RPTOR	PCDHA9	ANKRD36	EP300
SGCZ	AGBL4	KMT2C	PCDHGA6	PCDHGA8	PTPRD	NRXN1	PCDHGA8	PRKG1	PCDHA7	ROBO1	DCC	ROBO1	DPP6	PCDHA10	BCL6	NRXN1	TTN	PCDHGA4
CNTN5	CCSER1	PCDHA4	PCDHA9	POLE	SF3B1	MAGI2	CSMD1	MACROD2	MMP26	THSD7B	SGCZ	THSD7B	RYR2	MMP26	CUBN	RYR2	MUC16	PCDHA8
PCDH15	IL1RAPL2	PCDHGB2	EP300	MUC16	IDH2	PTPRT	KMT2C	ROBO1	CSMD1	EPHA6	CDH12	WWOX	CDH18	PCDHGA7	RNF213	ROBO2	PCDHA5	ERBB3
PTPRN2	GRID2	CHEK2	ARID1A	PCDHA9	RBFOX1	THSD7B	PCDHGB5	PRKN	PCDHGB4	CTNND2	PTPRT	NRG3	DMD	CSMD2	SULT1A1	ERBB4	OR8U1	ATM
ROBO1	CDH1	ZNF717	SYNE1	ZFHX3	SGCZ	EPHA6	PCDHA10	DPP10	PCDHA8	KCNIP4	TTN	MDGA2	ADGRL3	PCDHA11	KMT2A	PCDHGA8	KMT2C	CSMD3
PRKG1	PCDH15	PCDHA5	PCDHGA7	DMD	CTNNA3	SNTG1	NEB	PCDH9	SPTA1	ADGRB3	SPAG16	GPC5	KCNIP4	PKHD1L1	PKHD1	PCDH15	IGFN1	SYNE1
DCC	NKAIN2	ZNF429	PCDHA10	EYS	CDH18	CNTN5	SMAD4	ADGRB3	RYR3	DPP10	ADGRB3	LRRTM4	THSD7B	SYNE1	FLNB	OBSCN	OBSCN	TSC1
FHIT	PRKG1	PDGFRA	STK11	PCDHGB5	CDH12	PRKG1	MUC4	THSD7B	XIRP2	GRID2	NEGR1	AUTS2	GPC5	PCDHGB4	KMT2D	DMD	PCDHA6	PCDHGB2
IL1RAPL1	ZFHX3	PCDHGA5	PCDHGB4	CNTNAP2	PCDH15	CDH13	FBXW7	NKAIN2	MET	AGBL4	CTNND2	EPHA6	ATR	DNAH7	EPHA8	PIK3CA	HLA-B	PTPRD
SDK1	CDH18	PCDHGB3	DST	PCDHGA9	ADGRL3	PTPRN2	PCDHGA9	PTPRN2	STK11	DCC	CDH13	PTPRT	NRXN3	HBE1	PTK2B	PTPRT	HLA-A	PCDHA9
PRKN	ESR1	RYR2	PCDHGA8	RYR2	CEBPA	DPP6	CSMD3	CTNNA3	PCDHGA8	MDGA2	TMEM132D	KCNIP4	CCSER1	ANK3	SDHA	RIMS2	PCDHA7	CSMD1
NPAS3	CDH4	PCDHA6	AF241726.2	SYNE1	GPC5	ADGRL3	LRP1B	GPC5	KEAP1	SPAG16	IL1RAPL2	IL1RAPL1	MARCH1	XIRP2	ALK	DLG2	FLG	KMT2A
CDH18	CNTN5	CSMD3	MUC5B	PCDHA10	MACROD2	FAM155A	PRIM2	ADGRL3	FAM135B	GRM8	DPP6	DLGAP2	ADGRB3	FAT4	APC	PCDHGB5	PLEC	PCDHGA5
PARD3B	PTPRT	ROBO2	SYNE2	PCDHGB6	BRAF	NKAIN2	PCDHA11	RYR2	BRAF	MACROD2	ROBO1	MACROD2	NKAIN3	USH2A	FGFR2	PCDHA10	PCDHGA1	LRP1B
IDH1	GPC6	PCDHA7	LRP1B	DST	CTNNA2	ZFHX3	PCDHGB6	NLGN1	PTPRD	CNTN4	RALYL	CNTN4	PRKN	GRIN2A	NPM1	RBFOX1	PCDHA8	FAT1
CACNA2D3	USH2A	PCDHGA6	OR1S1	AF241726.2	NRXN3	AGBL1	FAT4	PTPRT	PTPRN2	RIMS2	GALNTL6	GALNT17	PTPRN2	APOB	ATR	PTPRD	TNRC18	ROBO2
KCNIP4	DLGAP2	USH2A	PCDHGA9	CTCF	KCNIP4	MARCH1	KMT2D	NELL1	KMT2D	CDH13	GRM8	SNTG1	NEGR1	RYR2	PBRM1	PCDH9	AQP7	RYR2
PCDH9	SGCZ	IL1RAPL1	PCDHGB5	PIK3R1	IL1RAPL1	DCC	PCDHGA10	ANKS1B	TSPEAR	NELL1	DLGAP2	CDH4	AGBL4	PTPRD	TTN	GPC5	PCDHGA2	PCDHGB3
CDH13	ERBB4	PIK3R1	FLG	USH2A	NRXN1	CNTNAP5	DST	LINGO2	COL11A1	GRIK2	CDH4	MARCH1	GRM8	PCDHGA8	CARD11	CDH18	HRNR	XIRP2
LRMDA	RGS7	FLG	MAGEA12	PCDH15	MAGI2	ROBO1	FAT3	MAGI2	FAT3	KHDRBS2	KHDRBS2	ANKS1B	NKAIN2	FLG	KRAS	GPC6	SSPO	AHNAK2
NEGR1	CDH13	CDH12	OBSCN	PCDHGA10	PIM1	MUC4	TCF7L2	SPAG16	MUC17	ANKS1B	KCNIP4	NKAIN2	ROBO1	DSCAM	FLT4	ROBO1	UVSSA	DMD
THSD7B	KMT2C	PCDHGA7	ZSCAN5A	OBSCN	RUNX1	DPP10	PCLO	SDK1	RYR1	ASTN2	DGKB	CCSER1	FAM155A	MGAM	SMARCB1	DLGAP2	DSPP	ZFHX3
MARCH1	CNTNAP5	TSPEAR	OR1S2	NEB	NRG3	DLGAP2	CNTNAP2	CDH13	NAV3	DPP6	THSD7B	TMEM132D	USH2A	OBSCN	DLC1	NRG3	IGSF3	MACF1
NELL1	GATA3	DLGAP2	PCDHA11	PCDHA11	PRKN	GRM8	RYR2	AGBL1	RB1	MALRD1	USH2A	NELL1	SPAG16	DNAH8	MUC12	USH2A	HLA-DRB1	CDKN1A
NLGN1	SDK1	KMT2D	DMD	ZFHX4	PTPRN2	MDGA2	PTPRN2	LRRTM4	OBSCN	AGBL1	NLGN1	DPP6	FSTL5	HYDIN	INPP4B	APC	PABPC1	PCDHGA6
NCKAP5	GRM8	HMCN1	CREBBP	CNTNAP5	ERBB4	CTNND2	ATM	MARCH1	KMT2C	MARCH1	NRG3	PRKN	KHDRBS2	DNAH9	SMARCA4	HMCN1	PCDHGA3	FMN2
CNTNAP5	AUTS2	PKHD1	NF1	MUC4	CNTNAP5	IL1RAPL1	RNF43	NPAS3	PCDHA9	AUTS2	FHIT	FHIT	ALK	PTPRT	INSR	PCDHGA9	TAS2R31	DST
GALNTL6	RALYL	AF241726.2	NOTCH1	TENM1	IDH1	KCNIP4	PCDHA12	CTNND2	PCDHGB5	PRKN	RIMS2	DCC	FGF14	DCC	DMD	FLG	FRG2C	ERCC2
DSCAM	RIMS2	PCDHA8	PCDHGB6	CTNNA3	SRSF2	DSCAM	RYR1	FAM155A	CTNNA2	GALNT17	RYR2	GALNTL6	CDH13	PCDHA12	MYH11	CTNNA3	PCMTD1	EYS
LRRTM4	NELL1	RBFOX1	PLEC	KMT2C	DLG2	AGBL4	FRG1	CTNNB1	PCLO	NEGR1	BRAF	ASTN2	DLGAP2	MUC17	LRP2	MAGI2	PCDHA9	PCDHA10
ADGRL3	ANKS1B	ZFHX3	CSMD1	MACF1	DCC	KDM5C	PCDHGB7	MDGA2	ARID1A	SUGCT	NKAIN3	FSTL5	LINGO2	ZFHX4	FANCI	ARID1A	HLA-C	HMCN1
PTPRT	ADGRL3	NOTCH1	RYR2	PCDHGB7	GPC6	TMEM132D	DLGAP2	TMEM132D	DNAH9	LRRTM4	AF241726.2	ADGRB3	SORCS1	RP1	GNAQ	CNTN5	SPTBN5	GPC5
CDH12	DPP10	OBSCN	SPEN	NRXN1	IL1RAPL2	CDH8	SDK1	DPP6	PCDH15	FSTL5	GRM7	GRM8	PTPRT	RYR1	NOTCH2	NRXN3	RYR1	RBFOX1
ADGRL2	ADGRB3	PCDHGB4	RNF213	HMCN1	LRRTM4	MUC16	USH2A	DLGAP1	COL22A1	WWOX	ATRNL1	ZFHX3	SMARCA4	DNAH3	RB1	CTNNA2	FAM186A	FBXW7
IMMP2L	KHDRBS2	CDH18	USH2A	RYR3	FSTL5	RYR2	ABCA13	TP53	DNAH5	SORCS1	DPYD	NEGR1	FHIT	THSD7B	ABCC4	FAT3	PCDHGB1	KRAS
ARHGAP15	ROBO1	RB1	PCDHGA10	FAT3	GALNTL6	NCAM2	DNAH5	GRM8	RELN	DLGAP2	EPHA6	KHDRBS2	NRXN1	ROS1	BRCA2	CNTNAP5	PTEN	OBSCN
NKAIN2	TTN	IL1RAPL2	PCLO	KMT2D	NAALADL2	WT1	HMCN1	CACNA2D3	PAPPA2	FGF14	LSAMP	RYR2	CDH4	NEB	ABCC2	PCLO	TTC34	MUC17
SMYD3	NRG3	KHDRBS2	HSPG2	RBFOX1	EZH2	GALNT17	MUC6	DSCAM	CSMD2	OPCML	ARID1A	CACNA2D3	ZFHX3	CNTNAP2	ATRX	PCDHGB6	NOTCH1	PCDHGA7
CCSER1	MARCH1	TMEM132D	FAT1	FAT1	EPHA6	ABCA13	MSH3	NBEA	PKHD1	PRKG1	IQCJ-SCHIP1	RIMS2	CNBD1	PCDH15	EPHA6	ZFHX4	PCDHGA4	DLG2
CNTN4	MED12	SMARCB1	HUWE1	PPP2R1A	NKAIN2	FSTL5	FLG	ASTN2	PKHD1L1	ZNF804B	DPP10	NCAM2	RGS7	ZIM2	PCDHA1	CDH12	LAMA5	SYNE2
MYT1L	MDGA2	LRP2	ZFHX4	FAT4	DGKB	USH2A	AHNAK2	GRM7	PCDHGA9	FHIT	MALRD1	AGBL1	HCN1	ERBB4	TSC2	SDK1	ANKLE1	BRCA2
ARID1A	NRXN1	SYNE1	HYDIN	FBXW7	KMT2D	WWOX	PLEC	PDE4D	ALK	TMEM132D	ASTN2	CALN1	RALYL	ABCA13	IL7R	FAT4	NCOR2	FAT4
FOXP1	GALNTL6	PCDHA9	MACF1	NBEA	KRAS	MTUS2	PCDH15	FSTL5	NF1	SORCS3	GRID2	SPAG16	IQCJ-SCHIP1	PCDHGB5	KNL1	ADGRB3	HMCN2	SPEN
AGBL1	MAP3K1	PTPRD	MUC17	CDH12	BCL6	PCDHGA1	DNAH11	GABRG3	DMD	C8orf34	MYT1L	CTNND2	ANKS1B	FAT3	KDR	SGCZ	MUC17	ERBB4
CDH4	DIAPH2	MACROD2	NBEA	PTPRD	NEGR1	PCDH9	FANK1	LAMA2	ADAMTS12	ATRNL1	NKAIN2	GABRG3	PRKDC	SPHKAP	PDGFRB	NBEA	PCDHGB2	FLG
CACNA2D1	CALN1	SGCZ	PCDHA12	PCDHA12	MPL	ANKS1B	DMD	ATP8A2	APOB	SDK1	LRRTM4	SUGCT	CNTN4	PAPPA2	JAK1	PCDHA11	PHF2	AF241726.2
DPP6	AGBL1	PCLO	TRRAP	ABCA13	DLGAP2	AUTS2	MSH6	PCLO	HBE1	MYT1L	CNTN4	PCDH11X	WT1	PTCH1	MET	DCC	KCNJ12	PCDHGB4
ADGRB3	CNTN4	THSD7B	TSC2	MUC5B	NLGN1	LRRTM4	AMER1	CACNA2D1	CNTNAP2	CNBD1	NELL1	MYT1L	GPC6	SPTA1	PCDHA2	RYR3	CFAP46	NRXN3
CTNND2	GALNT17	TERT	ADGRV1	LRP2	MDGA2	CCSER1	CTNNB1	ERC2	SI	ERC2	CNBD1	MALRD1	AR	RYR3	JAK3	SNTG1	PCDHGA5	CDH12
PCDHGA1	VPS13B	KCNJ12	CSMD3	ROBO2	USH2A	GPC6	MUC17	FHIT	FAT1	RYR2	PDE11A	SDK1	PCDH9	DNAH17	PER1	ZFHX3	CROCC	DCC
SYNE1	EPHA6	PCDH15	NEB	XIRP2	PRKG1	GRIK2	RYR3	MALRD1	CDH10	CACNA2D3	NAALADL2	DPP10	EDIL3	SCN10A	NSD1	KMT2D	HERC2	DNAH5
MALRD1	THSD7B	PCDHGA8	OR10G8	PCLO	MUC6	NRG3	EYS	ZNF804B	EYS	CDH4	ATM	PTPRN2	ATM	LRP2	PTCH2	RYR1	FRG1	USH2A
VPS13B	NKAIN3	PTPRN2	TENM1	ATRX	AGBL4	NELL1	ZNF717	CNTN4	ANK2	GABRG3	DSCAM	IL1RAPL2	RGS6	RELN	MYH9	EPHA6	NBPF11	APC
HMCN1	NEGR1	SDK1	UBR4	DLG2	WWOX	ASTN2	ROBO2	LSAMP	HMCN1	NLGN1	PRKN	ATRNL1	GRID1	AL132671.2	PCDHA3	NEB	SPEG	AC058822.1
ANKS1B	LRRTM4	CTNNA3	FAT2	DNAH11	PCLO	KMT2C	DNAH17	FBN2	TNR	GALNTL6	FSTL5	SORCS1	ABCA13	ADGRB3	HRAS	SPTA1	HLA-DQA1	ARID1B
KIF26B	SPAG16	PTCH1	KMT2A	DNAH5	SOCS1	MTOR	PCDHGA11	ZFHX3	PCDHA10	CLSTN2	PCDH9	CLSTN2	AUTS2	PREX2	EPHA3	KMT2C	PCDHGB3	MAGI2
MDGA2	TENM4	GRID2	NAV3	DCC	SNTG1	INPP4B	ZFHX4	GRIK2	CACNA1E	RALYL	AUTS2	GRIK2	UNC13C	UNC13C	TP63	PCDHGA10	BICRA	PCDHA11
ZFPM2	LSAMP	HCN1	RB1	PTPRT	ADGRL2	RGS7	MACF1	BRINP3	ZNF536	USH2A	RGS7	NLGN1	AGBL1	NOTCH1	ALOX12B	DPP10	HSPG2	PTPRT
GPC5	PCDH11X	CNTN5	SRCAP	CCDC168	GRM7	DLGAP1	LRP2	HDAC9	LRP2	CALN1	SUGCT	IMMP2L	PDE1C	DNAH10	DICER1	PREX2	PRAMEF1	TSPEAR
TMEM132D	DGKB	RYR3	LRP2	MACROD2	DPP10	FAT3	FAT1	CDH4	PCDHGB6	NBEA	ADGRL3	OPCML	EPHA6	PCDHGA9	PRPF8	DNAH5	CSMD2	DNAH8
PCDHGA2	FHIT	ERBB4	MDN1	ADGRB3	KMT2C	MYO16	MYCBP2	INPP4B	NRXN1	UNC13C	LINGO2	PRKG1	CTNND2	KMT2D	SPTAN1	THSD7B	APC2	VPS13B
EPHA6	ZFPM2	DLG2	ZFHX3	PCDHGA11	WT1	PCDHGA2	ADGRV1	USH2A	DST	NCAM2	MDGA2	ZNF804B	NAALADL2	CACNA1E	CIITA	HYDIN	CSPG4	SMARCA4
DPYD	GRM7	PCDHGB5	AHNAK2	AC058822.1	NELL1	LSAMP	ARID1A	RIMS2	AHNAK2	LINGO2	SORCS3	NAALADL2	XKR4	NF1	PCDHA4	ABCA13	PCDHA10	FOXP1
LPP	UNC5D	CCSER1	DNAH10	AGBL4	PARD3B	AC058822.1	ZFHX3	SORCS3	ERBB4	PLXDC2	NCAM2	CDH8	APC	PKHD1	PTPRD	KRAS	VWF	CDH18
CAMTA1	DSCAM	EPHA6	DNAH2	DNAH10	MFSD11	AMER1	NRAS	IL1RAPL1	AF241726.2	ARHGAP15	UNC5D	CNBD1	IL1RAPL2	MYH1	HSP90AB1	DNAH11	ATM	CTNNA2
FGF14	LRMDA	SETD2	FGFR3	HERC2	RYR2	CDH4	SACS	CNBD1	EPHA5	TTN	ATP8A2	SORCS3	GRIN2A	MYO18B	MUC16	MUC4	TAS2R43	PCDHGA8
PARD3	NAALADL2	RELN	FLNA	DNAH8	AC005837.2	RIMS2	POLE	MYT1L	ABCA13	NTM	DLGAP1	ERC2	CACNA2D3	EPHA6	NRAS	LAMA1	ANKRD20A4	ARID2
SUGCT	PTPRM	ABCA13	PDE4DIP	DNAH7	DPYD	FMN2	PTEN	AUTS2	PLXNA4	GRM5	MARCH1	DACH2	DPYD	PEG3	BRCA1	MACROD2	NBPF12	BIRC6
GRM7	NLGN1	CFAP47	PKD1	HUWE1	PCDH9	PCDHA1	TSPEAR	GALNT17	AC058822.1	CCSER1	OPCML	SNTG2	OPCML	MROH2B	EP300	AUTS2	FMN2	CUBN
RABGAP1L	PCDH9	PCDHGA9	VPS13D	DNAH3	PCDH11X	LINGO2	MUC5B	RIMS1	HYDIN	FAM155A	GPC6	ADGRL3	FANCA	KIT	FES	CTNND2	HUWE1	MACROD2
ERC2	DACH2	ADGRV1	APOB	FLG	INPP4B	SPAG16	NF1	UNC13C	FMN2	IMMP2L	FAM155A	NTM	LRRTM4	SCN11A	PTK2	GRID2	PCDHGA6	AHNAK
		FUBP1	FLG2	PCDH9													POTEE	NCOR1
		HLA-A	NSD1															PCDH9
		PRKG1

## Sheet: Dataset S4
Dataset S4. OTS-Select sample result
GENE	NUCLEOTIDE	AMINO_ACID	VAF	gDNA_VAF	ID	TOTAL _READS	CHROM	POS	REF	ALT	COSMID	ensembl_search_mode	100_ Genes_PF	ClinVar _PF	OTS_ current _PF	COSMIC _NF	VAF _NF	Germline _NF	C50bp _NF	SNP _NF	READ _NF	Tumor1 /Liquid0	Pooled _Flag	Selected _Flag	Enable_ Processing _Flag	Initial Rank	RankChange Flag_NF_ TWO_DOWN	RankChange Flag_NF_ ONE_DOWN	Rank Change Flag_PF	Disable_ Processing _Flag	Ensembl _search _mode	temp _clinvar	temp_ cosmic	temp _dbsnp	temp _jmorp	rank _col	step1	step2	step3	step4	step5	step6	file_name
ATM	c.2804C>G	p.T935R	0.48		abc_123	523					0	SNP	1	1	0	1	0	1	0	1	0	1	1	0	1	A	1	1	0	0	0	1	-1	-1	2	D	0	0	1	1	1	0	abc_123.csv
KMT2D	c.8540G>A	p.R2847H	0.099		abc_123	425					0	SNP	1	0	0	0	1	0	0	0	0	1	0	0	1	E	1	0	0	1	0	0	0	0	0	E	0	0	0	0	0	0	abc_123.csv
TP53	c.524G>A	p.R175H	0.635		abc_123	532					0	SNP	1	0	1	0	0	0	0	0	0	1	1	1	0	S	0	0	1	0	0	0	1566	0	0	S	1	1	1	1	1	0	abc_123.csv
DICER1	c.3791C>G	T1264R	0.092		abc_123	666	chr14	95569942	G	C	0	SNP	0	0	0	1	1	0	0	0	0	1	1	0	1	A	1	1	0	0	0	0	-1	-1	1	D	0	0	1	1	1	0	abc_123.csv
TET2	c.3054T>G	N1018K	0.406		abc_123	649	chr4	106158153	T	G	0	SNP	0	0	0	1	0	1	0	0	0	1	1	1	1	A	1	1	0	0	0	0	-1	-1	1	D	0	0	1	1	1	0	abc_123.csv
CDKN2A	c.197A>G	H66R	0.444		abc_123	304	chr9	21971161	T	C	0	SNP	0	1	1	0	0	0	0	0	0	1	1	1	1	A	0	0	1	0	0	1	5	-1	-1	A	0	0	1	1	1	0	abc_123.csv
KRAS	c.35G>C	p.G12A	0.1383		abc_123	353					0	SNP	1	0	1	0	0	0	0	0	0	1	1	1	0	S	0	0	1	0	0	0	2436	0	0	S	1	1	1	1	1	0	abc_123.csv
SETD2	c.2914G>A	p.E972K	0.4525		abc_123	483					0	SNP	0	0	0	0	0	1	0	1	0	1	1	0	1	B	1	1	0	0	0	0	-1	-1	2	E	0	0	0	1	1	0	abc_123.csv
These results show OTS-Select ranking applied to all eight gene mutations identified by NGS.
Variants with a "Selected_Flag" value of "1" in column Y represent the four mutations ultimately selected by OTS-Select.
Descriptions of each column can be found in the "Table3_README" tab.

## Sheet: Dataset S4_README
README for Dataset S4					README for Supplementary Table 3
Column name	Description
GENE	Gene symbol according to HGNC nomenclature.
NUCLEOTIDE	Coding DNA sequence (CDS) change described using HGVS nomenclature.
AMINO_ACID	Resulting amino acid change described using HGVS protein notation.
VAF	Variant allele frequency, defined as the proportion of sequencing reads supporting the variant allele.
gDNA_VAF	Variant allele frequency measured in genomic (wild-type) DNA.
ID	Unique identifier for the specimen or sample.
TOTAL_READS	Total sequencing depth at the variant locus.
CHROM	Chromosome on which the variant is located.
POS	Genomic coordinate of the variant position.
REF	Reference allele at the specified genomic position.
ALT	Alternate (variant) allele at the specified genomic position.
COSMID	Legacy COSMIC mutation identifier.
ensembl_search_mode	Classification of the input variant as SNP, deletion (DEL), or insertion (INS), which is used for subsequent database queries.
100_Genes_PF	Positive flag indicating that the gene is among the top 100 most frequently mutated genes in the relevant organ according to the COSMIC database.
ClinVar_PF	Positive flag indicating that the variant is annotated as Pathogenic or Likely pathogenic in the ClinVar database.
OTS_current_PF	Positive flag indicating that the variant corresponds to a validated probe listed in the CSV file.
COSMIC_NF	Negative flag indicating that the variant has fewer than five registrations or no registration in the COSMIC database.
VAF_NF	Negative flag indicating that the variant allele frequency (VAF) is below the predefined threshold.
Germline_NF	Negative flag indicating a high VAF suggestive of germline origin; however, this negative flag is not applied to variants in genes listed in the "LOH_gene" column of the CSV file.
C50bp_NF	Negative flag indicating that the variant is located within 50 bp of the C-terminus of the encoded protein.
SNP_NF	Negative flag indicating that interrogation of the jMorp database suggests the variant is likely a single nucleotide polymorphism.
READ_NF	Negative flag indicating insufficient sequencing depth at the variant locus.
Tumor1/Liquid0	Set to 1 for tumor tissue samples and 0 for liquid biopsy samples.
Pooled_Flag	Set to 1 if the variant was queried against at least one database; otherwise set to 0.
Selected_Flag	Flag indicating variants selected as up to four candidate targets for ctDNA monitoring by the OTS-Select algorithm.
Enable_Processing_Flag	Initialized as 1 for all variants and set to 0 once ranking is completed. If four variants with no negative flags are selected, the OTS-Select algorithm terminates. If this condition is not met, variants with exactly one negative flag retain a value of 1, and the algorithm proceeds to subsequent steps.
InitialRank	Initial rank assigned based solely on CSV information (e.g., gene name, CDS change, and VAF), without database interrogation.
RankChangeFlag_NF_TWO_DOWN	Set to 1 if a negative flag that decreases the rank by one level is present; otherwise set to 0.
RankChangeFlag_NF_ONE_DOWN	Set to 1 if a negative flag that decreases the rank by two levels is present; otherwise set to 0.
RankChangeFlag_PF	Set to 1 if a positive flag that increases the rank by one level is present; otherwise set to 0.
Disable_Processing_Flag	Set to 1 if the variant is listed in the "Non-recommended_gene" column of the CSV file or, in tumor tissue sequencing, has a VAF < 1%. Variants with this flag are excluded from selection by the algorithm.
Ensembl_search_mode	When CHROM, POS, REF, and ALT are available, the variant is classified as SNP/DEL/INS and used for Ensembl queries. If REF and ALT are missing, the variant is clasfied as an SNP.
temp_clinvar	Set to 1 if a hit is found, −1 if no hit is found, and 0 if the query is not performed.
temp_cosmic	Set to the number of registrations if a hit is found, −1 if no hit is found, and 0 if the query is not performed.
temp_dbsnp	Set to 1 if a hit is found, −1 if no hit is found, and 0 if the query is not performed.
temp_jmorp	Set to 1 if a hit is found, −1 if no hit is found, and 0 if the query is not performed.
rank_col	The rank assigned after integrating all positive and negative flags.
step1	Set to 1 if the variant is listed as "OTS-1000ex" in CSV file and satisfies the VAF criteria; otherwise set to 0.
step2	Set to 1 if the variant is listed in the "cancer_driver_gene" column of the CSV file; otherwise set to 0.
step3	Set to 1 if the gene matches one of the genes listed in "OTS-1000ex"; otherwise set to 0.
step4	Set to 1 if the gene is listed in the "Cancer_related_gene" column of the CSV file; otherwise set to 0.
step5	Set to 1 if none of the above conditions apply and the variant is not listed in the “non-recommended_mutation” list in the CSV file; otherwise set to 0.
step6	Among the remaining variants not captured by the above categories, set to 1 if ; otherwise set to 0.
file_name	Original file name applied to the OTS-Select algorithm

## Sheet: Dataset S5
Dataset S5. Describing OTS-Select gene list csv
OTS-1000ex_ gene	OTS-1000ex_CDS_ change	Cancer_ driver_ gene	OTS-1000ex_ related_gene	Cancer_ related_gene	Non-recommended_gene	Non-recommended_ mutation_gene	Non-recommended_ mutation_CDS_ change	Validated_ probe_gene	Validated_probe_ CDS_change	LOH_ gene
AKT1	c.49G>A	ALK	AKT1	ABL1	APC	FBXW7	c.349_351del	AKT1	c.49G>A	TP53
AKT1	c.726G>A	BRAF	ALK	ABL2	KMT1A	CDH1	c.44_46del	ALK	c.3824G>A	EGFR
AKT1	c.155T>G	EGFR	ARID1A	ACVR2A	KMT1B	NOTCH1	c.7244_7246del	ARID1A	c.5965C>T	KRAS
AKT1	c.235C>A	ERBB2	ARID2	ADAMTS20	KMT1C	ARID2	c.644T>G	ARID1A	c.5548dupG	BRAF
ALK	c.3522C>A	EZH2	ASXL1	AFF1	KMT1D	GNAS	c.947C>T	ARID1A	c.3826C>T	PIK3CA
ALK	c.3824G>A	FGFR2	ATM	AFF3	KMT1E	MTOR	c.3269G>A	ARID1A	c.5161C>T	CDKN2A
ALK	c.4338C>T	FLT3	ATR	AKAP9	KMT1F	EZH2	c.1937A>C	ARID1A	c.2077C>T	KIT
ALK	c.2535T>C	HRAS	ATRX	AKT1	KMT2A	ROS1	c.5222C>T	ARID1A	c.4003C>T	ERBB1
ARID1A	c.5965C>T	KRAS	BCL6	AKT2	KMT2B	ROS1	c.4058A>C	ARID1A	c.2830C>T	ERBB2
ARID1A	c.5548dupG	PIK3CA	BCOR	AKT3	KMT2C			ARID1A	c.5164C>T	ERBB3
ARID1A	c.3826C>T	RET	BRAF	ALK	KMT2D			ARID1A	c.4336C>T	ERBB4
ARID1A	c.5161C>T	TP53	BRCA1	AR	EP300			ARID1A	c.6259G>A
ARID1A	c.2077C>T	ROS1	BRCA2	ARID1A	PTEN			ARID1A	c.6472C>T
ARID1A	c.4003C>T	MET	CALR	ARID2	CREBBP			ARID1A	c.4381C>T
ARID1A	c.2830C>T	MLH1	CARD11	ARNT	PARP4			ARID1A	c.1897C>T
ARID1A	c.5164C>T	MSH2	CD79B	ASXL1	SUV39H1			ASXL1	c.1934dup
ARID1A	c.4336C>T	MSH6	CDH1	ATF1	SUV39H2			ATM	c.1009C>T
ARID1A	c.6259G>A	PMS2	CDKN2A	ATM	SETDB1			ATRX	c.2719C>T
ARID1A	c.6472C>T	NTRK1	CHD4	ATR	CLLD8			BRAF	c.1799T>A
ARID1A	c.4381C>T	NTRK2	CIC	ATRX	NCOR1			BRAF	c.1798_1799delinsAA
ARID1A	c.4582C>T	NTRK3	CTNNB1	AURKA	HIST1H3B			BRAF	c.1801A>G
ARID1A	c.3634C>T	BRCA1	DICER1	AURKB				BRAF	c.1781A>G
ARID1A	c.1897C>T	BRCA2	DNMT3A	AURKC				BRAF	c.1406G>C
ARID1A	c.2248C>T		EGFR	AXL				BRAF	c.1780G>A
ARID1A	c.3598C>T		ERBB2	BAI3				BRAF	c.1798G>A
ARID1A	c.1435C>T		ERBB3	BAP1				CD79B	c.589T>C
ARID1A	c.3424C>T		ERBB4	BCL10				CD79B	c.589T>A
ARID1A	c.4750C>T		ERCC2	BCL11A				CD79B	c.590A>G
ARID1A	c.1210C>T		ERCC5	BCL11B				CD79B	c.590A>C
ARID1A	c.1901C>G		ESR1	BCL2				CD79B	c.589T>G
ARID1A	c.1177C>T		EZH2	BCL2L1				CD79B	c.590A>T
ARID1A	c.1696C>T		FANCA	BCL2L2				CDKN2A	c.238C>T
ARID1A	c.2032C>T		FBXW7	BCL3				CDKN2A	c.358G>T
ARID1A	c.4477C>T		FGFR2	BCL6				CDKN2A	c.35C>A
ARID1A	c.4624G>T		FGFR3	BCL9				CDKN2A	c.322G>C
ARID1A	c.1543C>T		FLT3	BCR				CDKN2A	c.202G>A
ARID1A	c.2518C>T		FOXA1	BIRC2				CDKN2A	c.221A>C
ARID1A	c.2632C>T		FOXL2	BIRC3				CIC	c.643C>T
ARID1A	c.4087C>T		FOXP1	BIRC5				CIC	c.644G>A
ARID1A	c.6260G>A		GNA11	BLM				CTNNB1	c.121A>G
ARID2	c.890C>T		GNAQ	BLNK				CTNNB1	c.134C>T
ARID2	c.940C>T		GNAS	BMPR1A				CTNNB1	c.133T>C
ARID2	c.1624C>T		H3F3A	BRAF				CTNNB1	c.110C>T
ARID2	c.820C>T		H3F3B	BRD3				CTNNB1	c.98C>G
ASXL1	c.1934dup		HRAS	BRIP1				CTNNB1	c.110C>G
ASXL1	c.2077C>T		IDH1	BTK				CTNNB1	c.98C>T
ATM	c.5557G>A		IDH2	BUB1B				CTNNB1	c.122C>T
ATM	c.1009C>T		IRF4	CARD11				CTNNB1	c.94G>A
ATM	c.9023G>A		JAK2	CASC5				CTNNB1	c.101G>T
ATM	c.1010G>A		JAK3	CBL				CTNNB1	c.95A>G
ATR	c.7875G>A		KDR	CCND1				CTNNB1	c.100G>A
ATR	c.5460T>C		KIT	CCND2				CTNNB1	c.98C>A
ATRX	c.4276C>T		KRAS	CCNE1				CTNNB1	c.109T>G
ATRX	c.5579A>G		MAP2K1	CD79A				CTNNB1	c.107A>C
ATRX	c.2719C>T		MAPK1	CD79B				CTNNB1	c.1004A>T
ATRX	c.2341C>T		MAX	CDC73				CTNNB1	c.134C>A
ATRX	c.5408G>A		MED12	CDH1				CTNNB1	c.100G>C
ATRX	c.748C>T		MET	CDH11				CTNNB1	c.130C>G
BCL6	c.1781G>A		MLH1	CDH2				EGFR	c.2573T>G
BCOR	c.4376A>G		MPL	CDH20				EGFR	c.2235_2249del
BRAF	c.1799T>A		MSH2	CDH5				EGFR	c.2236_2250del
BRAF	c.1798_1799delinsAA		MSH6	CDK12				EGFR	c.2369C>T
BRAF	c.1801A>G		MTOR	CDK4				EGFR	c.2582T>A
BRAF	c.1781A>G		MYC	CDK6				EGFR	c.2156G>C
BRAF	c.1406G>C		MYCN	CDK8				EGFR	c.2155G>A
BRAF	c.1780G>A		MYD88	CDKN2A				EGFR	c.866C>T
BRAF	c.1397G>T		NF2	CDKN2B				EGFR	c.1793G>T
BRAF	c.1798G>A		NFE2L2	CDKN2C				EGFR	c.664C>T
BRAF	c.1742A>G		NOTCH1	CEBPA				ERBB2	c.929C>T
BRAF	c.1397G>A		NRAS	CHEK1				ERBB2	c.2329G>T
BRAF	c.1405G>A		NT5C2	CHEK2				ERBB2	c.2524G>A
BRAF	c.1406G>T		PBRM1	CIC				ERBB2	c.929C>A
BRCA1	c.2612C>T		PIK3CA	CKS1B				ERBB2	c.2305G>T
BRCA1	c.3548A>G		PIK3CB	CMPK1				ERBB2	c.2584A>G
BRCA1	c.2077G>A		PIK3CD	COL1A1				ERBB2	c.2198C>T
BRCA1	c.4900A>G		PIK3CG	CRBN				ERBB2	c.1979G>A
BRCA1	c.3113A>G		PIK3R1	CREB1				ERBB3	c.310G>A
BRCA1	c.3119G>A		PIK3R2	CRKL				ERCC2	c.713A>G
BRCA2	c.7397T>C		PMS2	CRTC1				ESR1	c.908A>G
BRCA2	c.865A>C		POLE	CSF1R				EZH2	c.1937A>T
BRCA2	c.2971A>G		PPP2R1A	CSMD3				EZH2	c.1936T>A
BRCA2	c.1365A>G		PTEN	CTNNA1				EZH2	c.1937A>C
BRCA2	c.1114A>C		PTPN11	CTNNB1				EZH2	c.1936T>C
BRCA2	c.2229T>C		RAC1	CYLD				EZH2	c.2045C>G
BRCA2	c.3807T>C		RAF1	CYP2C19				EZH2	c.2075C>T
CALR	c.1099_1150del		RB1	CYP2D6				FBXW7	c.1394G>A
CARD11	c.1876G>A		RET	DAXX				FBXW7	c.1513C>T
CARD11	c.688G>A		RHOA	DCC				FBXW7	c.1436G>A
CD79B	c.589T>C		RNF43	DDB2				FBXW7	c.1513C>G
CD79B	c.589T>A		ROS1	DDIT3				FBXW7	c.2065C>T
CD79B	c.590A>G		RXRA	DDR2				FBXW7	c.1634A>G
CD79B	c.590A>C		SF3B1	DEK				FBXW7	c.1627A>G
CD79B	c.589T>G		SMAD2	DICER1				FGFR2	c.755C>G
CD79B	c.590A>T		SMAD4	DNMT3A				FGFR2	c.1650T>A
CDH1	c.67C>T		SMARCA4	DPYD				FGFR3	c.746C>G
CDH1	c.1774G>A		SPOP	DST				FGFR3	c.1124A>G
CDH1	c.1901C>T		SRSF2	EGFR				FGFR3	c.742C>T
CDH1	c.187C>T		STAG2	EML4				FOXL2	c.402C>G
CDKN2A	c.238C>T		STAT3	EP400				GNAS	c.2531G>A
CDKN2A	c.172C>T		STK11	EPHA3				HRAS	c.37G>C
CDKN2A	c.247C>T		TERT	EPHA7				HRAS	c.182A>G
CDKN2A	c.330G>A		TET2	EPHB1				HRAS	c.35G>T
CDKN2A	c.341C>T		TP53	EPHB4				HRAS	c.182A>T
CDKN2A	c.329G>A		VHL	EPHB6				HRAS	c.181C>A
CDKN2A	c.262G>T		WT1	ERBB2				HRAS	c.34G>A
CDKN2A	c.358G>T		XPO1	ERBB3				HRAS	c.35G>A
CDKN2A	c.322G>T			ERBB4				HRAS	c.38G>T
CDKN2A	c.250G>T			ERCC1				HRAS	c.34G>T
CDKN2A	c.205G>T			ERCC2				HRAS	c.38G>A
CDKN2A	c.250G>A			ERCC3				HRAS	c.34G>C
CDKN2A	c.242C>T			ERCC4				HRAS	c.175G>A
CDKN2A	c.148C>T			ERCC5				IDH1	c.395G>A
CDKN2A	c.35C>A			ERG				IDH1	c.394C>G
CDKN2A	c.322G>A			ESR1				IDH2	c.419G>A
CDKN2A	c.143C>T			ETS1				JAK2	c.1849G>T
CDKN2A	c.181G>T			ETV1				KIT	c.2447A>T
CDKN2A	c.251A>G			ETV4				KIT	c.1727T>C
CDKN2A	c.262G>A			EXT1				KIT	c.2446G>C
CDKN2A	c.322G>C			EXT2				KIT	c.2466T>G
CDKN2A	c.387C>A			EZH2				KIT	c.1961T>C
CDKN2A	c.442G>A			FAM123B				KRAS	c.35G>A
CDKN2A	c.107C>G			FANCA				KRAS	c.35G>T
CDKN2A	c.170C>T			FANCC				KRAS	c.38G>A
CDKN2A	c.248A>G			FANCD2				KRAS	c.34G>T
CDKN2A	c.305C>T			FANCF				KRAS	c.35G>C
CDKN2A	c.45G>A			FANCG				KRAS	c.34G>A
CDKN2A	c.220G>T			FAS				KRAS	c.34G>C
CDKN2A	c.97G>T			FBXW7				KRAS	c.37G>T
CDKN2A	c.132C>A			FGFR1				KRAS	c.183A>C
CDKN2A	c.220G>A			FGFR2				KRAS	c.436G>A
CDKN2A	c.227C>T			FGFR3				KRAS	c.182A>T
CDKN2A	c.244G>A			FGFR4				KRAS	c.183A>T
CDKN2A	c.247C>G			FH				KRAS	c.351A>T
CDKN2A	c.355G>T			FLCN				MAP2K1	c.171G>T
CDKN2A	c.387C>G			FLI1				MAX	c.179G>A
CDKN2A	c.457G>A			FLT1				MLH1	c.1151T>A
CDKN2A	c.202G>A			FLT3				MPL	c.1544G>T
CDKN2A	c.221A>C			FLT4				MSH6	c.3261del
CDKN2A	c.226G>A			FN1				MYC	c.482C>T
CDKN2A	c.290T>G			FOXL2				MYD88	c.818T>C
CDKN2A	c.301G>T			FOXO1				NFE2L2	c.235G>C
CDKN2A	c.305C>A			FOXO3				NFE2L2	c.86A>G
CDKN2A	c.389T>A			FOXP1				NFE2L2	c.246A>T
CDKN2A	c.128G>T			FOXP4				NFE2L2	c.70T>C
CDKN2A	c.251A>T			FZR1				NFE2L2	c.72G>C
CDKN2A	c.323A>G			G6PD				NFE2L2	c.241G>A
CDKN2A	c.392G>A			GATA1				NFE2L2	c.242G>T
CDKN2A	c.79G>T			GATA2				NFE2L2	c.85G>T
CHD4	c.417G>T			GATA3				NFE2L2	c.239C>A
CHD4	c.2924G>A			GDNF				NFE2L2	c.239C>G
CHD4	c.3484C>T			GNA11				NFE2L2	c.80A>G
CHD4	c.3313C>T			GNAQ				NOTCH1	c.7541_7542del
CHD4	c.4013G>T			GNAS				NRAS	c.182A>G
CIC	c.2816G>C			GPR124				NRAS	c.181C>A
CIC	c.4533C>T			GRM8				NRAS	c.35G>A
CIC	c.643C>T			GUCY1A2				NRAS	c.38G>A
CIC	c.604C>T			HCAR1				NRAS	c.182A>T
CIC	c.644G>A			HIF1A				NRAS	c.34G>A
CIC	c.601C>T			HLF				NRAS	c.34G>T
CTNNB1	c.121A>G			HNF1A				NRAS	c.37G>C
CTNNB1	c.134C>T			HOOK3				NRAS	c.183A>T
CTNNB1	c.133T>C			HRAS				NRAS	c.35G>T
CTNNB1	c.110C>T			HSP90AA1				NRAS	c.35G>C
CTNNB1	c.98C>G			HSP90AB1				PIK3CA	c.3140A>G
CTNNB1	c.110C>G			ICK				PIK3CA	c.1633G>A
CTNNB1	c.94G>T			IDH1				PIK3CA	c.1624G>A
CTNNB1	c.98C>T			IDH2				PIK3CA	c.3140A>T
CTNNB1	c.122C>T			IGF1R				PIK3CA	c.1636C>A
CTNNB1	c.94G>A			IGF2				PIK3CA	c.263G>A
CTNNB1	c.101G>T			IGF2R				PIK3CA	c.1035T>A
CTNNB1	c.101G>A			IKBKB				PIK3CA	c.1634A>G
CTNNB1	c.95A>G			IKBKE				PIK3CA	c.1258T>C
CTNNB1	c.100G>A			IKZF1				PIK3CA	c.2176G>A
CTNNB1	c.97T>C			IL2				PIK3CA	c.1637A>G
CTNNB1	c.98C>A			IL21R				PIK3CA	c.3139C>T
CTNNB1	c.109T>G			IL6ST				PIK3CA	c.241G>A
CTNNB1	c.95A>T			IL7R				PIK3CA	c.3145G>C
CTNNB1	c.94G>C			ING4				PIK3CA	c.3129G>T
CTNNB1	c.107A>C			IRF4				PIK3CA	c.353G>A
CTNNB1	c.110C>A			IRS2				PIK3CA	c.1357G>A
CTNNB1	c.104T>G			ITGA10				PIK3CA	c.1633G>C
CTNNB1	c.1004A>T			ITGA9				PIK3CA	c.3062A>G
CTNNB1	c.134C>A			ITGB2				PIK3CA	c.277C>T
CTNNB1	c.109T>C			ITGB3				PIK3CA	c.331A>G
CTNNB1	c.134C>G			JAK1				PIK3CA	c.3073A>G
CTNNB1	c.97T>G			JAK2				PIK3CA	c.113G>A
CTNNB1	c.100G>C			JAK3				PIK3CA	c.1030G>A
CTNNB1	c.133T>G			JUN				PIK3CA	c.1624G>C
CTNNB1	c.95A>C			KAT6A				PIK3CA	c.311C>T
CTNNB1	c.1161T>A			KAT6B				PIK3CA	c.316G>C
CTNNB1	c.104T>C			KDM5C				PIK3R1	c.1690A>G
CTNNB1	c.1004A>C			KDM6A				PIK3R1	c.978G>A
CTNNB1	c.130C>G			KDR				PIK3R1	c.1699A>G
CTNNB1	c.1161T>G			KEAP1				POLE	c.1231G>C
CTNNB1	c.122C>A			KIT				PPP2R1A	c.548G>A
DICER1	c.5113G>A			KLF6				PTPN11	c.226G>A
DICER1	c.5125G>A			KRAS				PTPN11	c.215C>T
DICER1	c.5438A>G			LAMP1				RB1	c.1735C>T
DICER1	c.5425G>A			LCK				RHOA	c.50G>T
DNMT3A	c.2645G>A			LIFR				SMAD4	c.1082G>A
DNMT3A	c.2644C>T			LPHN3				SMAD4	c.1157G>A
EGFR	exon 19 any			LPP				SMARCA4	c.3575G>A
EGFR	exon 20 any			LRP1B				STAG2	c.646C>T
EGFR	c.2573T>G			LTF				STAG2	c.3034C>T
EGFR	c.2235_2249del			LTK				TP53	c.524G>A
EGFR	c.2236_2250del			MAF				TP53	c.743G>A
EGFR	c.2369C>T			MAFB				TP53	c.818G>A
EGFR	c.2582T>A			MAGEA1				TP53	c.817C>T
EGFR	c.2156G>C			MAGI1				TP53	c.742C>T
EGFR	c.2155G>A			MALT1				TP53	c.844C>T
EGFR	c.2303G>T			MAML2				TP53	c.637C>T
EGFR	c.866C>T			MAP2K1				TP53	c.733G>A
EGFR	c.1793G>T			MAP2K2				TP53	c.747G>T
EGFR	c.2155G>T			MAP2K4				TP53	c.659A>G
EGFR	c.2125G>A			MAP3K7				TP53	c.586C>T
EGFR	c.323G>A			MAPK1				TP53	c.1024C>T
EGFR	c.865G>A			MAPK8				TP53	c.916C>T
EGFR	c.2497T>G			MARK1				TP53	c.469G>T
EGFR	c.2126A>C			MARK4				TP53	c.536A>G
EGFR	c.664C>T			MBD1				TP53	c.853G>A
EGFR	c.1562G>A			MCL1				TP53	c.488A>G
EGFR	c.2543C>T			MDM2				TP53	c.527G>T
EGFR	c.185T>G			MDM4				TP53	c.818G>T
EGFR	c.2240T>C			MEN1				TP53	c.734G>A
EGFR	c.2320G>A			MET				TP53	c.722C>T
EGFR	c.2504A>T			MITF				TP53	c.578A>G
EGFR	c.787A>C			MLH1				TP53	c.535C>T
EGFR	c.866C>A			MLL				TP53	c.584T>C
EGFR	c.2527G>A			MLL2				TP53	c.574C>T
EGFR	c.2327G>A			MLL3				TP53	c.856G>A
EGFR	c.754C>T			MLLT10				TP53	c.701A>G
EGFR	c.340G>A			MMP2				TP53	c.711G>A
ERBB2	c.929C>T			MN1				TP53	c.713G>A
ERBB2	c.2264T>C			MPL				TP53	c.814G>A
ERBB2	c.2329G>T			MRE11A				TP53	c.743G>T
ERBB2	c.2033G>A			MSH2				TP53	c.832C>T
ERBB2	c.3508C>G			MSH6				TP53	c.646G>A
ERBB2	c.2524G>A			MTOR				TP53	c.473G>A
ERBB2	c.929C>A			MTR				TP53	c.641A>G
ERBB2	c.1963A>G			MTRR				TP53	c.527G>A
ERBB2	c.2305G>T			MUC1				TP53	c.473G>T
ERBB2	c.2301C>G			MUTYH				TP53	c.839G>C
ERBB2	c.2329G>C			MYB				TP53	c.422G>A
ERBB2	c.2606T>G			MYC				TP53	c.455C>T
ERBB2	c.2584A>G			MYCL1				TP53	c.725G>T
ERBB2	c.2305G>C			MYCN				TP53	c.614A>G
ERBB2	c.3647C>A			MYD88				TP53	c.833C>T
ERBB2	c.2198C>T			MYH11				TP53	c.734G>T
ERBB2	c.1960A>G			MYH9				TP53	c.797G>A
ERBB2	c.2327G>T			NBN				TP53	c.839G>A
ERBB2	c.829G>T			NCOA1				TP53	c.451C>T
ERBB2	c.520C>T			NCOA2				TP53	c.707A>G
ERBB2	c.808G>T			NCOA4				TP53	c.581T>G
ERBB2	c.1979G>A			NF1				TP53	c.733G>T
ERBB2	c.3382G>A			NF2				TP53	c.796G>A
ERBB2	c.428G>A			NFE2L2				TP53	c.404G>A
ERBB2	c.874G>C			NFKB1				TP53	c.517G>T
ERBB2	c.2305G>A			NFKB2				TP53	c.517G>A
ERBB2	c.2350C>T			NIN				TP53	c.395A>G
ERBB3	c.3348G>A			NKX2-1				TP53	c.380C>T
ERBB3	c.310G>A			NLRP1				TP53	c.824G>A
ERBB3	c.2783A>G			NPM1				TP53	c.404G>T
ERBB3	c.310G>T			NRAS				TP53	c.730G>T
ERBB3	c.889G>T			NSD1				TP53	c.577C>T
ERBB3	c.850G>A			NTRK1				TP53	c.749C>T
ERBB3	c.695C>T			NTRK3				TP53	c.772G>A
ERBB3	c.3355A>T			NUMA1				TP53	c.824G>T
ERBB3	c.994G>A			NUP214				TP53	c.725G>A
ERBB3	c.2537G>T			NUP98				TP53	c.481G>A
ERBB3	c.1423C>T			PAK3				TP53	c.736A>G
ERBB3	c.985A>G			PALB2				TP53	c.797G>T
ERBB3	c.2000G>A			PARP1				TP53	c.638G>T
ERBB3	c.273G>A			PAX3				TP53	c.713G>T
ERBB4	c.2131C>T			PAX5				TP53	c.578A>T
ERBB4	c.316C>T			PAX7				TP53	c.476C>T
ERBB4	c.55A>G			PAX8				TP53	c.406C>T
ERBB4	c.1354G>A			PBRM1				TP53	c.461G>T
ERBB4	c.2512C>T			PBX1				TP53	c.731G>A
ERBB4	c.283C>T			PDE4DIP				TP53	c.437G>A
ERCC2	c.934G>A			PDGFB				TP53	c.811G>A
ERCC2	c.713A>G			PDGFRA				TP53	c.638G>A
ERCC5	c.1586G>C			PDGFRB				TP53	c.715A>G
ERCC5	c.760A>G			PER1				TP53	c.493C>T
ERCC5	c.641G>A			PGAP3				TP53	c.536A>T
ERCC5	c.2636A>G			PHOX2B				TP53	c.438G>A
ERCC5	c.3310G>C			PIK3C2B				TP53	c.592G>T
ERCC5	c.3157G>C			PIK3CA				TP53	c.610G>T
ESR1	c.908A>G			PIK3CB				TP53	c.711G>T
ESR1	c.1613A>G			PIK3CD				TP53	c.430C>T
ESR1	c.1610A>C			PIK3CG				TP53	c.722C>G
ESR1	c.1138G>C			PIK3R1				TP53	c.746G>T
ESR1	c.1610A>G			PIK3R2				TP53	c.841G>C
ESR1	c.1609T>A			PIM1				TP53	c.730G>A
ESR1	c.1607T>A			PKHD1				TP53	c.329G>T
ESR1	c.739G>A			PLAG1				TP53	c.814G>T
ESR1	c.1387T>C			PLCG1				TP53	c.396G>C
ESR1	c.932C>T			PLEKHG5				TP53	c.830G>T
ESR1	c.1688C>T			PML				TP53	c.799C>T
EZH2	c.1937A>T			PMS1				TP53	c.745A>T
EZH2	c.1936T>A			PMS2				TP53	c.838A>G
EZH2	c.1937A>C			POT1				TP53	c.836G>A
EZH2	c.1936T>C			POU5F1				TP53	c.844C>G
EZH2	c.2045C>G			PPARG				TP53	c.569C>T
EZH2	c.2075C>T			PPP2R1A				TP53	c.833C>G
FANCA	c.2151G>T			PRDM1				TP53	c.475G>C
FANCA	c.4303G>C			PRKAR1A				TP53	c.396G>T
FANCA	c.1501G>A			PRKDC				TP53	c.832C>A
FANCA	c.2426G>A			PSIP1				TP53	c.548C>G
FBXW7	c.1393C>T			PTCH1				TP53	c.583A>T
FBXW7	c.1394G>A			PTGS2				TP53	c.452C>A
FBXW7	c.1513C>T			PTPN11				TP53	c.820G>T
FBXW7	c.1436G>A			PTPRD				TP53	c.775G>T
FBXW7	c.1745C>T			PTPRT				TP53	c.745A>G
FBXW7	c.1513C>G			RAD50				TP53	c.499C>T
FBXW7	c.2065C>T			RAF1				TP53	c.644G>T
FBXW7	c.832C>T			RALGDS				TP53	c.700T>C
FBXW7	c.1099C>T			RARA				TP53	c.841G>A
FBXW7	c.1972C>T			RB1				TP53	c.427G>A
FBXW7	c.1268G>T			RECQL4				TP53	c.298C>T
FBXW7	c.1514G>A			REL				TP53	c.716A>G
FBXW7	c.1435C>G			RET				TP53	c.310C>T
FBXW7	c.1514G>T			RHOH				TP53	c.763A>T
FBXW7	c.1177C>T			RNASEL				TP53	c.542G>A
FBXW7	c.1435C>T			RNF2				TP53	c.821T>C
FBXW7	c.1634A>G			RNF213				TP53	c.464C>A
FBXW7	c.1429G>A			ROS1				TP53	c.832C>G
FBXW7	c.2077G>A			RPS6KA2				TP53	c.746G>C
FBXW7	c.1436G>C			RRM1				TP53	c.818G>C
FBXW7	c.1436G>T			RUNX1				TP53	c.375G>T
FBXW7	c.1385C>T			RUNX1T1				TP53	c.467G>C
FBXW7	c.2066G>A			SAMD9				TP53	c.580C>T
FBXW7	c.670C>T			SBDS				TP53	c.845G>A
FBXW7	c.1513C>A			SDHA				TP53	c.514G>T
FBXW7	c.1322G>A			SDHB				TP53	c.772G>T
FBXW7	c.664C>T			SDHC				TP53	c.329G>C
FBXW7	c.1627A>G			SDHD				TP53	c.856G>T
FBXW7	c.1973G>A			2025-09-09				TP53	c.541C>T
FBXW7	c.41G>A			SETD2				TP53	c.405C>G
FBXW7	c.1394G>T			SF3B1				TP53	c.738G>A
FBXW7	c.1558G>A			SGK1				TP53	c.584T>A
FGFR2	c.755C>G			SH2D1A				TP53	c.785G>T
FGFR2	c.1650T>A			SMAD2				TP53	c.375G>A
FGFR2	c.1147T>C			SMAD4				TP53	c.859G>T
FGFR2	c.1127A>G			SMARCA4				TP53	c.487T>A
FGFR2	c.1650T>G			SMARCB1				TP53	c.725G>C
FGFR2	c.1978A>G			SMO				TP53	c.848G>C
FGFR2	c.758C>G			SMUG1				TP53	c.596G>T
FGFR2	c.2183A>G			SOCS1				TP53	c.743G>C
FGFR2	c.629G>A			SOX11				TP53	c.380C>A
FGFR2	c.870G>C			SOX2				TP53	c.526T>A
FGFR3	c.746C>G			SRC				TP53	c.313G>T
FGFR3	c.1124A>G			SSX1				TP53	c.374C>T
FGFR3	c.742C>T			STK11				TP53	c.451C>G
FLT3	c.2503G>T			STK36				TP53	c.472C>T
FLT3	c.2504A>T			SUFU				TP53	c.412G>C
FLT3	c.2503G>C			SYK				TP53	c.731G>T
FLT3	c.680C>T			SYNE1				TP53	c.613T>G
FLT3	c.2028C>A			TAF1				TP53	c.808T>C
FLT3	c.2505T>G			TAF1L				TP53	c.328C>T
FOXA1	c.526A>G			TAL1				TP53	c.661G>T
FOXA1	c.749C>T			TBX22				TP53	c.388C>T
FOXA1	c.798C>G			TCF12				TP53	c.796G>C
FOXA1	c.676G>A			TCF3				TP53	c.809T>G
FOXL2	c.402C>G			TCF7L1				TP53	c.578A>C
FOXP1	c.1343C>T			TCF7L2				VHL	c.221T>A
FOXP1	c.97C>T			TCL1A				XPO1	c.1711G>A
FOXP1	c.106C>T			TET1
GNA11	c.626A>T			TET2
GNA11	c.547C>T			TFE3
GNAQ	c.626A>T			TGFBR2
GNAQ	c.626A>C			TGM7
GNAQ	c.286A>T			THBS1
GNAQ	c.548G>A			TIMP3
GNAS	c.2530C>T			TLR4
GNAS	c.2531G>A			TLX1
H3F3A	c.83A>T			TNFAIP3
H3F3A	c.103G>T			TNFRSF14
H3F3A	c.103G>A			TNK2
H3F3B	c.110A>T			TOP1
HRAS	c.37G>C			TP53
HRAS	c.182A>G			TPR
HRAS	c.35G>T			TRIM24
HRAS	c.182A>T			TRIM33
HRAS	c.181C>A			TRIP11
HRAS	c.34G>A			TRRAP
HRAS	c.35G>A			TSC1
HRAS	c.81T>C			TSC2
HRAS	c.38G>T			TSHR
HRAS	c.34G>T			UBR5
HRAS	c.38G>A			UGT1A1
HRAS	c.37G>A			USP9X
HRAS	c.183G>T			VHL
HRAS	c.34G>C			WAS
HRAS	c.35G>C			WHSC1
HRAS	c.37G>T			WRN
HRAS	c.175G>A			WT1
HRAS	c.351G>C			XPA
HRAS	c.351G>T			XPC
IDH1	c.395G>A			XPO1
IDH1	c.394C>T			XRCC2
IDH1	c.394C>G			ZNF384
IDH1	c.394C>A			ZNF521
IDH1	c.395G>T			WT1
IDH2	c.419G>A			XPA
IDH2	c.515G>A			XPC
IDH2	c.516G>T			XPO1
IDH2	c.515G>T			XRCC2
IDH2	c.514A>G			ZNF384
IDH2	c.514A>T			ZNF521
IDH2	c.516G>C			NOTCH1
IDH2	c.418C>T			NOTCH2
IRF4	c.176A>G			NOTCH3
IRF4	c.208C>G			NOTCH4
JAK2	c.1849G>T
JAK3	c.1533G>A
JAK3	c.1970G>A
JAK3	c.2164G>A
KDR	c.1416A>T
KDR	c.889G>A
KDR	c.3095G>A
KDR	c.1040G>A
KIT	c.2447A>T
KIT	c.1727T>C
KIT	c.1676T>A
KIT	c.2446G>T
KIT	c.2446G>C
KIT	c.1924A>G
KIT	c.1679T>A
KIT	c.2466T>G
KIT	c.1621A>C
KIT	c.1961T>C
KIT	c.2466T>A
KIT	c.1669T>G
KIT	c.1676T>C
KRAS	c.35G>A
KRAS	c.35G>T
KRAS	c.38G>A
KRAS	c.34G>T
KRAS	c.35G>C
KRAS	c.34G>A
KRAS	c.34G>C
KRAS	c.37G>T
KRAS	c.183A>C
KRAS	c.436G>A
KRAS	c.182A>G
KRAS	c.182A>T
KRAS	c.183A>T
KRAS	c.37G>A
KRAS	c.37G>C
KRAS	c.437C>T
KRAS	c.181C>A
KRAS	c.38G>C
KRAS	c.38G>T
KRAS	c.351A>T
KRAS	c.175G>A
KRAS	c.40G>A
KRAS	c.64C>A
KRAS	c.182A>C
KRAS	c.351A>C
KRAS	c.436G>C
KRAS	c.57G>T
KRAS	c.57G>C
KRAS	c.53C>A
KRAS	c.173C>T
KRAS	c.179G>A
KRAS	c.187G>A
KRAS	c.28G>A
KRAS	c.176C>G
KRAS	c.181C>G
MAP2K1	c.370C>T
MAP2K1	c.171G>T
MAP2K1	c.167A>C
MAP2K1	c.607G>A
MAP2K1	c.371C>T
MAP2K1	c.383G>A
MAP2K1	c.199G>A
MAP2K1	c.361T>A
MAPK1	c.964G>A
MAPK1	c.961G>A
MAPK1	c.404G>A
MAX	c.179G>A
MAX	c.223C>T
MAX	c.83A>G
MED12	c.131G>A
MED12	c.130G>A
MET	c.3029C>T
MET	c.3757T>G
MET	c.1124A>G
MLH1	c.655A>G
MLH1	c.1151T>A
MPL	c.1544G>T
MSH2	c.965G>A
MSH2	c.1738G>T
MSH2	c.2038C>T
MSH6	c.276A>G
MSH6	c.3261del
MSH6	c.3261dup
MSH6	c.116G>A
MTOR	c.5553C>T
MTOR	c.6909G>A
MTOR	c.6644C>A
MTOR	c.6644C>T
MTOR	c.5395G>A
MTOR	c.5930C>A
MTOR	c.4379T>C
MTOR	c.7280T>A
MTOR	c.7280T>G
MTOR	c.5930C>G
MTOR	c.6016G>T
MTOR	c.7255G>A
MTOR	c.5930C>T
MYC	c.77A>G
MYC	c.482C>T
MYC	c.221C>T
MYCN	c.131C>T
MYCN	c.1333G>A
MYCN	c.1118G>A
MYCN	c.904C>T
MYD88	c.818T>C
NF2	c.169C>T
NF2	c.1021C>T
NFE2L2	c.235G>C
NFE2L2	c.85G>C
NFE2L2	c.101G>A
NFE2L2	c.235G>A
NFE2L2	c.100C>G
NFE2L2	c.86A>G
NFE2L2	c.246A>T
NFE2L2	c.101G>C
NFE2L2	c.230A>G
NFE2L2	c.88C>T
NFE2L2	c.92G>C
NFE2L2	c.92G>A
NFE2L2	c.245A>G
NFE2L2	c.246A>C
NFE2L2	c.85G>A
NFE2L2	c.70T>C
NFE2L2	c.72G>C
NFE2L2	c.242G>A
NFE2L2	c.244G>C
NFE2L2	c.83T>C
NFE2L2	c.89T>G
NFE2L2	c.241G>A
NFE2L2	c.242G>T
NFE2L2	c.85G>T
NFE2L2	c.1495C>T
NFE2L2	c.230A>T
NFE2L2	c.239C>A
NFE2L2	c.239C>G
NFE2L2	c.80A>G
NFE2L2	c.91G>A
NFE2L2	c.238A>C
NFE2L2	c.238A>G
NFE2L2	c.241G>C
NFE2L2	c.1705C>T
NFE2L2	c.229G>C
NFE2L2	c.236A>G
NFE2L2	c.245A>T
NFE2L2	c.68T>G
NFE2L2	c.76C>A
NFE2L2	c.79G>T
NFE2L2	c.95T>G
NFE2L2	c.101G>T
NFE2L2	c.1706G>A
NFE2L2	c.229G>T
NFE2L2	c.236A>T
NFE2L2	c.239C>T
NFE2L2	c.241G>T
NFE2L2	c.77A>C
NFE2L2	c.92G>T
NFE2L2	c.235G>T
NOTCH1	c.7541_7542del
NRAS	c.182A>G
NRAS	c.181C>A
NRAS	c.35G>A
NRAS	c.38G>A
NRAS	c.182A>T
NRAS	c.34G>A
NRAS	c.34G>T
NRAS	c.37G>C
NRAS	c.183A>T
NRAS	c.35G>T
NRAS	c.35G>C
NRAS	c.38G>T
NRAS	c.183A>C
NRAS	c.34G>C
NT5C2	c.1100G>A
PBRM1	c.2211A>G
PBRM1	c.4335A>G
PBRM1	c.3522A>T
PBRM1	c.2128C>T
PIK3CA	c.3140A>G
PIK3CA	c.1633G>A
PIK3CA	c.1624G>A
PIK3CA	c.3140A>T
PIK3CA	c.1636C>A
PIK3CA	c.263G>A
PIK3CA	c.1035T>A
PIK3CA	c.1634A>G
PIK3CA	c.1258T>C
PIK3CA	c.2176G>A
PIK3CA	c.1637A>G
PIK3CA	c.3139C>T
PIK3CA	c.241G>A
PIK3CA	c.3145G>C
PIK3CA	c.3129G>T
PIK3CA	c.353G>A
PIK3CA	c.1357G>A
PIK3CA	c.1633G>C
PIK3CA	c.3127A>G
PIK3CA	c.323G>A
PIK3CA	c.3062A>G
PIK3CA	c.277C>T
PIK3CA	c.331A>G
PIK3CA	c.3129G>A
PIK3CA	c.3073A>G
PIK3CA	c.1637A>C
PIK3CA	c.113G>A
PIK3CA	c.317G>T
PIK3CA	c.1616C>G
PIK3CA	c.1030G>A
PIK3CA	c.278G>A
PIK3CA	c.3145G>A
PIK3CA	c.1031T>G
PIK3CA	c.3132T>A
PIK3CA	c.1093G>A
PIK3CA	c.112C>T
PIK3CA	c.1635G>T
PIK3CA	c.1624G>C
PIK3CA	c.1638G>T
PIK3CA	c.1173A>G
PIK3CA	c.1252G>A
PIK3CA	c.1636C>G
PIK3CA	c.2702G>T
PIK3CA	c.1635G>C
PIK3CA	c.3019G>C
PIK3CA	c.333G>T
PIK3CA	c.311C>T
PIK3CA	c.1357G>C
PIK3CA	c.1625A>T
PIK3CA	c.2908G>A
PIK3CA	c.3132T>G
PIK3CA	c.316G>C
PIK3CA	c.1034A>T
PIK3CA	c.1639G>A
PIK3CA	c.3129G>C
PIK3CB	c.3151G>A
PIK3CB	c.3200A>T
PIK3CB	c.962G>A
PIK3CB	c.1408G>A
PIK3CB	c.1654G>A
PIK3CD	c.1558T>G
PIK3CD	c.3061G>A
PIK3CD	c.2503G>A
PIK3CD	c.113G>A
PIK3CD	c.262C>T
PIK3CG	c.2569A>G
PIK3CG	c.1565A>G
PIK3CG	c.1325C>A
PIK3CG	c.493G>A
PIK3CG	c.2275G>A
PIK3CG	c.799G>A
PIK3R1	c.1690A>G
PIK3R1	c.978G>A
PIK3R1	c.1042C>T
PIK3R1	c.1699A>G
PIK3R1	c.1126G>A
PIK3R1	c.1381C>T
PIK3R1	c.1924C>T
PIK3R1	c.1072C>T
PIK3R2	c.937T>C
PIK3R2	c.1117G>A
PIK3R2	c.1669G>T
PMS2	c.1866G>A
PMS2	c.1531A>G
PMS2	c.1789A>T
PMS2	c.2570G>C
POLE	c.857C>G
POLE	c.1231G>T
POLE	c.1231G>C
PPP2R1A	c.547C>T
PPP2R1A	c.536C>G
PPP2R1A	c.767C>T
PPP2R1A	c.548G>A
PPP2R1A	c.544C>T
PTEN	c.389G>A
PTEN	c.388C>G
PTEN	c.955_958del
PTEN	c.697C>T
PTEN	c.388C>T
PTEN	c.800del
PTEN	c.968del
PTEN	c.517C>T
PTEN	c.518G>A
PTEN	c.1003C>T
PTEN	c.511C>T
PTEN	c.733C>T
PTEN	c.19G>T
PTEN	c.389G>T
PTEN	c.640C>T
PTEN	c.406T>C
PTEN	c.49C>T
PTEN	c.892C>T
PTEN	c.278A>G
PTEN	c.395G>A
PTEN	c.895G>T
PTEN	c.202T>C
PTEN	c.112C>T
PTEN	c.376G>A
PTEN	c.424C>T
PTEN	c.182A>G
PTEN	c.385G>A
PTEN	c.389G>C
PTEN	c.686C>G
PTEN	c.834C>G
PTEN	c.407G>A
PTEN	c.493G>A
PTEN	c.737C>T
PTEN	c.302T>C
PTEN	c.464A>G
PTEN	c.276C>A
PTEN	c.386G>A
PTEN	c.1021T>G
PTEN	c.103A>G
PTEN	c.106G>A
PTEN	c.367C>T
PTEN	c.370T>A
PTEN	c.380G>A
PTEN	c.376G>T
PTEN	c.380G>T
PTEN	c.445C>T
PTEN	c.477G>T
PTEN	c.494G>A
PTPN11	c.226G>A
PTPN11	c.215C>T
PTPN11	c.214G>A
PTPN11	c.181G>T
PTPN11	c.182A>T
PTPN11	c.179G>T
PTPN11	c.205G>A
RAC1	c.85C>T
RAC1	c.533C>T
RAC1	c.86C>T
RAF1	c.770C>T
RAF1	c.776C>T
RB1	c.1735C>T
RB1	c.751C>T
RB1	c.958C>T
RB1	c.1363C>T
RB1	c.1654C>T
RB1	c.1666C>T
RB1	c.1072C>T
RB1	c.2359C>T
RB1	c.1333C>T
RET	c.2753T>C
RET	c.135A>G
RET	c.2307G>T
RHOA	c.50G>T
RHOA	c.50G>A
RHOA	c.125A>G
RHOA	c.14G>A
RHOA	c.46T>C
RHOA	c.139G>A
RHOA	c.13C>T
RHOA	c.185G>A
RHOA	c.482C>T
RNF43	c.433C>T
ROS1	c.433A>C
ROS1	c.6637G>A
ROS1	c.6686C>G
ROS1	c.6682A>C
ROS1	c.500G>A
RXRA	c.1280C>T
RXRA	c.1280C>A
SF3B1	c.2098A>G
SF3B1	c.1874G>A
SF3B1	c.1873C>T
SF3B1	c.2225G>A
SF3B1	c.1998G>C
SF3B1	c.1997A>C
SMAD2	c.1391C>G
SMAD2	c.544C>T
SMAD4	c.1082G>A
SMAD4	c.1081C>T
SMAD4	c.1333C>T
SMAD4	c.353C>T
SMAD4	c.403C>T
SMAD4	c.1157G>A
SMAD4	c.1051G>C
SMAD4	c.1067C>T
SMAD4	c.988G>A
SMAD4	c.1487G>A
SMARCA4	c.2729C>T
SMARCA4	c.3727C>T
SMARCA4	c.3575G>A
SMARCA4	c.3574C>T
SMARCA4	c.3694G>A
SMARCA4	c.2461G>A
SMARCA4	c.3566G>A
SMARCA4	c.2653C>T
SMARCA4	c.3469C>T
SMARCA4	c.2738C>T
SMARCA4	c.2758G>A
SMARCA4	c.3403C>T
SPOP	c.399C>G
SPOP	c.397T>G
SPOP	c.305T>G
SPOP	c.391T>G
SPOP	c.260A>G
SPOP	c.399C>A
SPOP	c.304T>G
SPOP	c.349A>G
SPOP	c.398T>C
SPOP	c.232G>A
SPOP	c.259T>A
SPOP	c.398T>G
SPOP	c.393G>C
SPOP	c.362G>A
SPOP	c.388G>C
SRSF2	c.284C>A
SRSF2	c.284C>T
STAG2	c.646C>T
STAG2	c.775C>T
STAG2	c.3034C>T
STAT3	c.1919A>T
STAT3	c.1981G>T
STAT3	c.1852G>C
STAT3	c.1940A>T
STK11	c.1062C>G
STK11	c.109C>T
STK11	c.580G>T
STK11	c.647C>T
STK11	c.667G>T
TERT	_C228T
TERT	_C250T
TET2	c.1648C>T
TET2	c.4393C>T
TP53	c.524G>A
TP53	c.743G>A
TP53	c.818G>A
TP53	c.817C>T
TP53	c.742C>T
TP53	c.844C>T
TP53	c.637C>T
TP53	c.733G>A
TP53	c.747G>T
TP53	c.659A>G
TP53	c.586C>T
TP53	c.1024C>T
TP53	c.916C>T
TP53	c.469G>T
TP53	c.536A>G
TP53	c.853G>A
TP53	c.488A>G
TP53	c.527G>T
TP53	c.818G>T
TP53	c.734G>A
TP53	c.722C>T
TP53	c.578A>G
TP53	c.535C>T
TP53	c.584T>C
TP53	c.574C>T
TP53	c.856G>A
TP53	c.701A>G
TP53	c.711G>A
TP53	c.713G>A
TP53	c.814G>A
TP53	c.743G>T
TP53	c.832C>T
TP53	c.646G>A
TP53	c.473G>A
TP53	c.641A>G
TP53	c.527G>A
TP53	c.473G>T
TP53	c.839G>C
TP53	c.422G>A
TP53	c.455C>T
TP53	c.725G>T
TP53	c.614A>G
TP53	c.833C>T
TP53	c.734G>T
TP53	c.797G>A
TP53	c.839G>A
TP53	c.451C>T
TP53	c.707A>G
TP53	c.581T>G
TP53	c.733G>T
TP53	c.796G>A
TP53	c.404G>A
TP53	c.517G>T
TP53	c.517G>A
TP53	c.395A>G
TP53	c.380C>T
TP53	c.824G>A
TP53	c.404G>T
TP53	c.730G>T
TP53	c.577C>T
TP53	c.749C>T
TP53	c.772G>A
TP53	c.824G>T
TP53	c.725G>A
TP53	c.481G>A
TP53	c.736A>G
TP53	c.797G>T
TP53	c.638G>T
TP53	c.713G>T
TP53	c.578A>T
TP53	c.476C>T
TP53	c.406C>T
TP53	c.461G>T
TP53	c.731G>A
TP53	c.437G>A
TP53	c.811G>A
TP53	c.638G>A
TP53	c.715A>G
TP53	c.493C>T
TP53	c.536A>T
TP53	c.438G>A
TP53	c.592G>T
TP53	c.610G>T
TP53	c.711G>T
TP53	c.430C>T
TP53	c.722C>G
TP53	c.746G>T
TP53	c.841G>C
TP53	c.730G>A
TP53	c.329G>T
TP53	c.814G>T
TP53	c.396G>C
TP53	c.830G>T
TP53	c.799C>T
TP53	c.745A>T
TP53	c.838A>G
TP53	c.836G>A
TP53	c.844C>G
TP53	c.569C>T
TP53	c.833C>G
TP53	c.475G>C
TP53	c.396G>T
TP53	c.832C>A
TP53	c.548C>G
TP53	c.583A>T
TP53	c.452C>A
TP53	c.820G>T
TP53	c.775G>T
TP53	c.745A>G
TP53	c.499C>T
TP53	c.644G>T
TP53	c.700T>C
TP53	c.841G>A
TP53	c.427G>A
TP53	c.298C>T
TP53	c.716A>G
TP53	c.310C>T
TP53	c.763A>T
TP53	c.542G>A
TP53	c.821T>C
TP53	c.464C>A
TP53	c.832C>G
TP53	c.746G>C
TP53	c.818G>C
TP53	c.375G>T
TP53	c.467G>C
TP53	c.580C>T
TP53	c.845G>A
TP53	c.514G>T
TP53	c.772G>T
TP53	c.329G>C
TP53	c.856G>T
TP53	c.511G>T
TP53	c.541C>T
TP53	c.811G>T
TP53	c.473G>C
TP53	c.405C>G
TP53	c.800G>C
TP53	c.853G>T
TP53	c.738G>A
TP53	c.584T>A
TP53	c.523C>G
TP53	c.394A>G
TP53	c.785G>T
TP53	c.375G>A
TP53	c.794T>C
TP53	c.722C>A
TP53	c.839G>T
TP53	c.528C>G
TP53	c.643A>G
TP53	c.859G>T
TP53	c.742C>G
TP53	c.747G>C
TP53	c.487T>A
TP53	c.725G>C
TP53	c.848G>C
TP53	c.487T>C
TP53	c.524G>T
TP53	c.535C>A
TP53	c.817C>A
TP53	c.454C>T
TP53	c.388C>G
TP53	c.796G>T
TP53	c.535C>G
TP53	c.596G>T
TP53	c.523C>T
TP53	c.530C>T
TP53	c.743G>C
TP53	c.380C>A
TP53	c.400T>C
TP53	c.526T>A
TP53	c.843C>A
TP53	c.313G>T
TP53	c.374C>T
TP53	c.377A>G
TP53	c.517G>C
TP53	c.503A>G
TP53	c.658T>A
TP53	c.587G>C
TP53	c.526T>C
TP53	c.451C>G
TP53	c.463A>C
TP53	c.700T>A
TP53	c.843C>G
TP53	c.472C>T
TP53	c.706T>A
TP53	c.659A>C
TP53	c.845G>C
TP53	c.623A>T
TP53	c.434T>A
TP53	c.412G>C
TP53	c.421T>C
TP53	c.731G>T
TP53	c.537T>A
TP53	c.542G>C
TP53	c.733G>C
TP53	c.857A>G
TP53	c.613T>G
TP53	c.808T>C
TP53	c.490A>G
TP53	c.718A>G
TP53	c.823T>C
TP53	c.854A>T
TP53	c.809T>C
TP53	c.645T>G
TP53	c.841G>T
TP53	c.423C>G
TP53	c.451C>A
TP53	c.497C>G
TP53	c.434T>C
TP53	c.559G>A
TP53	c.847C>T
TP53	c.328C>T
TP53	c.596G>A
TP53	c.830G>A
TP53	c.842A>G
TP53	c.712T>C
TP53	c.661G>T
TP53	c.388C>T
TP53	c.796G>C
TP53	c.809T>G
TP53	c.658T>C
TP53	c.840A>T
TP53	c.472C>G
TP53	c.833C>A
TP53	c.755T>C
TP53	c.395A>T
TP53	c.470T>G
TP53	c.530C>G
TP53	c.518T>C
TP53	c.578A>C
TP53	c.632C>T
VHL	c.481C>T
VHL	c.266T>A
VHL	c.194C>A
VHL	c.203C>A
VHL	c.472C>G
VHL	c.194C>T
VHL	c.484T>C
VHL	c.241C>T
VHL	c.343C>A
VHL	c.343C>T
VHL	c.506T>C
VHL	c.388G>C
VHL	c.240T>A
VHL	c.233A>G
VHL	c.239G>A
VHL	c.221T>A
VHL	c.263G>A
VHL	c.286C>T
VHL	c.217C>T
VHL	c.499C>T
VHL	c.263G>T
VHL	c.353T>C
VHL	c.361G>T
VHL	c.208G>T
VHL	c.266T>C
VHL	c.269A>T
VHL	c.332G>A
VHL	c.333C>A
VHL	c.452T>C
VHL	c.458T>C
VHL	c.525C>A
VHL	c.256C>T
VHL	c.383T>C
VHL	c.473T>A
VHL	c.473T>C
VHL	c.490C>T
VHL	c.551T>C
VHL	c.341G>C
VHL	c.350G>A
WT1	c.1107A>G
WT1	c.594C>T
WT1	c.1142C>A
WT1	c.1384C>T
WT1	c.1372C>T
WT1	c.1105C>T
WT1	c.1385G>A
XPO1	c.1711G>A
XPO1	c.2246G>A

## Sheet: Dataset S5_README
README for Dataset S5
Column name	Description
"OTS-1000ex_gene"	The "OTS-1000ex_gene" column lists mutations in combination with the corresponding entries in the "OTS-1000ex_CDS_change" column in the same row.
"OTS-1000ex_CDS_change"	The "OTS-1000ex_CDS_change" column lists mutations in combination with the corresponding entries in the "OTS-1000ex_gene" column in the same row.
"Cancer_driver_gene"	The "Cancer_driver_gene" column lists gene names defined as cancer driver genes in OTS-Select.
"OTS-1000ex_related_gene"	The "OTS-1000ex_related_gene" column lists the 106 genes corresponding to the mutations in OTS-1000ex.
"Cancer_related_gene"	The "Cancer_related_gene" column lists gene names defined as cancer-related genes in OTS-Select.
"Non-recommended_gene"	The "Non-recommended_gene" column lists gene names that OTS-Select defines as not suitable for use in ctDNA monitoring.
"Non-recommended_mutation_gene"	The "Non-recommended_mutation_gene" and "Non-recommended_mutation_CDS_change" columns list, by row, specific mutations unsuitable for ctDNA monitoring.
"Non-recommended_mutation_CDS_change"	The "Non-recommended_mutation_CDS_change" and "Non-recommended_mutation_gene" columns list, by row, specific mutations unsuitable for ctDNA monitoring.
"Validated_probe_gene"	The "Validated_probe_gene" column, together with the corresponding row entries in the "Validated_probe_CDS_change" column, specifies mutations for which validated probes are listed.
"Validated_probe_CDS_change"	The "Validated_probe_CDS_change" column, together with the corresponding row entries in the "Validated_probe_gene", specifies mutations for which validated probes are listed.
"LOH_gene"	The "LOH_gene" column lists genes prone to loss of heterozygosity (LOH) and is used in OTS-Select.
